# Supplementary material for: Overexpressing PpBURP2 in Rice Increases Plant Defense to Abiotic Stress and Bacterial Leaf Blight
Source: Front Plant Sci. 2022 May 6;13:812279. doi: 10.3389/fpls.2022.812279 (PMC9121072; doi:10.3389/fpls.2022.812279)
Supplement: Supplementary file 3 [file Table_2.xlsx]

## Sheet: Motif structure number of BURP
						protein name	signal peptide	conserved domain		repeat domain		BURP domain
						AtPG1d	⃝	12	16	2		9	20	10	5	4	14	1	3	6
						AtPG1c	⃝	12	16	2		9	20	10	5	4	14	1	3	6
						AtPG1b	⃝	12	16	2		9	20	10	5	4	14	1	3	6
						OsBURP14	⃝	12	16	2		9	20	10	5	4	14	1	3
						OsBURP12	⃝	12	16	2		9	20	10	5	4	14	1	3	6
						OsBURP16	⃝	12	16			9		10	5	4	14	1	3	6
						SmPG1			16			9			5	4
						SmPG5												1	3	6
						SmPG3			16						5	4		1
						SmPG4	⃝		16	2	19	9	20	10	5	4	14	1		6
						SmPG6	⃝		16	2	19	9	20	10	5	4	14	1		6
						SmPG2	⃝		16			9				4		1	3
						PpBURP4	⃝		16			9	20	10	5	4		1
						PpBURP5	⃝		16			9	20	10	5	4		1
						PpBURP8	⃝	2	16	2			20	10	5	4		1
						PpBURP7										4		1	3	6
						PpBURP6	⃝	13	16			9	20	10	5	4	17	1	3	6
						PpBURP3	⃝	13	16			9	20	10	5	4	17	1	3	6
						PpBURP2	⃝		16			9	20	10	5	4	17	1	3	6
						PpBURP1	⃝		16			9	20	10	5	4	17	1	3	6
						PpBURP9	⃝		16			9	20		5	4	17	1	3	6
						OsBURP7	⃝	13				9		10	5
						OsBURP1	⃝	13		15		9		10	5	4	18	1	3	6
						OsBURP2	⃝	13				9		10	5	4	18	1		6
						OsBURP6						9		10	5	4	18	1		6
						OsBURP8		13				9		10	5	4	18	1		6
						OsBURP3	⃝	13		15		9		10	5	4	18	1	3	6
						AtRD22	⃝	13		15		9		10	5	4		1	3
						OsBURP5		13				9		10	5	4	18	1	3	6
						OsBURP17	⃝	13		7		9		10	5	4	18	1	3	6
						OsBURP13	⃝	13				9		10		4	18	1	3	6
						OsBURP15	⃝	13				9							3
						OsBURP4						9			5	4		1		6
						OsBURP11		13		8		9		10		4		1	3	6
						OsBURP10	⃝	13				9		10		4	18	1	3	6
						OsBURP9	⃝			11		9		10		4		1	3	6
						AtUSP1	⃝					9		10	5	4		1	3

## Sheet:  accession number
protein name	accession number
AtPG1d	AT1G70370
AtPG1c	AT1G60390
AtPG1b	AT1G23760
OsBURP14	LOC_Os09g16010.1
OsBURP12	LOC_Os08g29200.1
OsBURP16	LOC_Os10g26940
SmPG1	XP_024528164.1
SmPG5	XP_024538407
SmPG3	XP_002962118.2
SmPG4	XP_024515919.1
SmPG6	XP_024514723.1
SmPG2	XP_024536418
PpBURP4	Pp1s81_232V6.1
PpBURP5	Pp1s7_236V6.1
PpBURP8	Pp1s281_126V6.1
PpBURP7	Pp1s26_27V6.1
PpBURP6	Pp1s56_133V6.1
PpBURP3	Pp1s298_14V6.1
PpBURP2	Pp1s374_47V6.1
PpBURP1	Pp1s204_70V6.1
PpBURP9	Pp1s15_23V6.1
OsBURP7	LOC_Os05g12630.1
OsBURP1	LOC_Os05g12400.1
OsBURP2	LOC_Os05g12640.1
OsBURP6	LOC_Os05g12410.1
OsBURP8	LOC_Os05g13490.1
OsBURP3	LOC_Os01g53240.1
AtRD22	AT5G25610
OsBURP5	LOC_Os04g14990.1
OsBURP17	LOC_Os11g06980.1
OsBURP13	LOC_Os08g38810.1
OsBURP15	LOC_Os09g30320.1
OsBURP4	LOC_Os02g18690.1
OsBURP11	LOC_Os06g19800
OsBURP10	LOC_Os06g17000.1
OsBURP9	LOC_Os06g13240.1
AtUSP1	AT1G49320
