# Supplementary material for: Overexpressing PpBURP2 in Rice Increases Plant Defense to Abiotic Stress and Bacterial Leaf Blight
Source: Front Plant Sci. 2022 May 6;13:812279. doi: 10.3389/fpls.2022.812279 (PMC9121072; doi:10.3389/fpls.2022.812279)
Supplement: Supplementary file 4 [file Table_3.xlsx]

## Sheet: Sheet1
Locus	Description	Score
LOC_Os03g08960	homeobox associated leucine zipper, putative, expressed	0.92
LOC_Os09g29460	homeobox associated leucine zipper, putative, expressed	0.91
LOC_Os03g12680	protein kinase, putative, expressed	0.902
LOC_Os06g08480	CHD3-type chromatin-remodeling factor PICKLE, putative, expressed	0.89
LOC_Os02g02040	protein kinase, putative, expressed	0.878
LOC_Os10g23090	homeobox associated leucine zipper, putative, expressed	0.866
LOC_Os05g49320	ribosomal protein L7/L12 C-terminal domain containing protein, expressed	0.862
LOC_Os08g37580	homeobox associated leucine zipper, putative, expressed	0.862
LOC_Os01g32660	STE_MEK_ste7_MAP2K.2 - STE kinases include homologs to sterile 7, sterile 11 and sterile 20 from yeast, expressed	0.838
LOC_Os07g15930	legume lectins beta domain containing protein, expressed	0.836
LOC_Os04g54190	cysteine-rich receptor-like protein kinase 8 precursor, putative, expressed	0.834
LOC_Os08g03240	lectin-like receptor kinase 1, putative, expressed	0.83
LOC_Os12g38610	lectin-like receptor kinase, putative, expressed	0.83
LOC_Os01g47330	ribosomal protein L7/L12 C-terminal domain containing protein, expressed	0.822
LOC_Os07g12480	receptor protein kinase, putative	0.812
LOC_Os06g05520	OsMKK1 - putative MAPKK based on amino acid sequence homology, expressed	0.812
LOC_Os04g56110	protein kinase, putative, expressed	0.806
