# Supplementary material for: Overexpressing PpBURP2 in Rice Increases Plant Defense to Abiotic Stress and Bacterial Leaf Blight
Source: Front Plant Sci. 2022 May 6;13:812279. doi: 10.3389/fpls.2022.812279 (PMC9121072; doi:10.3389/fpls.2022.812279)
Supplement: Supplementary file 5 [file Table_4.xlsx]

## Sheet: down genes
	BLASTP of down-regulated DEGs
Gene ID	Protein ID	Chlorophyta (taxid:3041)	charophytes (taxid:3146)	Bryophyta (taxid:3208)	Animalia (taxid:33208)
Os10g0569400	Os10t0569400	#N/A	#N/A	#N/A	#N/A
Os01g0606400	Os01t0606400	#N/A	#N/A	#N/A	#N/A
Os04g0498900	Os04t0498900	Os04t0498900	Os04t0498900	Os04t0498900	Os04t0498900
Os05g0472500	Os05t0472500	#N/A	#N/A	#N/A	#N/A
Os06g0493100	Os06t0493100	#N/A	#N/A	#N/A	#N/A
Os09g0344500	Os09t0344500	Os09t0344500	#N/A	Os09t0344500	Os09t0344500
Os02g0621300	Os02t0621300	Os02t0621300	Os02t0621300	Os02t0621300	Os02t0621300
Os10g0570200	Os10t0570200	#N/A	#N/A	#N/A	#N/A
Os11g0245100	Os11t0245100	Os11t0245100	Os11t0245100	Os11t0245100	Os11t0245100
Os01g0339500	Os01t0339500	#N/A	#N/A	#N/A	#N/A
Os08g0246950	Os08t0246950	#N/A	#N/A	#N/A	#N/A
Os08g0148600	Os08t0148600	Os08t0148600	#N/A	Os08t0148600	Os08t0148600
Os10g0569600	Os10t0569600	#N/A	#N/A	#N/A	#N/A
Os10g0558750	Os10t0558750	Os10t0558750	Os10t0558750	Os10t0558750	Os10t0558750
Os12g0516000	Os12t0516000	#N/A	#N/A	#N/A	#N/A
Os12g0476200	Os12t0476200	Os12t0476200	Os12t0476200	Os12t0476200	Os12t0476200
Os06g0129100	Os06t0129100	Os06t0129100	Os06t0129100	Os06t0129100	Os06t0129100
Os04g0369000	Os04t0369000	Os04t0369000	#N/A	Os04t0369000	Os04t0369000
Os05g0472400	Os05t0472400	Os05t0472400	Os05t0472400	Os05t0472400	Os05t0472400
Os10g0442400	Os10t0442400	Os10t0442400	#N/A	Os10t0442400	Os10t0442400
Os10g0569800	Os10t0569800	#N/A	#N/A	#N/A	#N/A
Os07g0614250	Os07t0614250	#N/A	#N/A	#N/A	#N/A
Os05g0390800	Os05t0390800	#N/A	#N/A	#N/A	#N/A
Os01g0115600	Os01t0115600	Os01t0115600	Os01t0115600	Os01t0115600	Os01t0115600
Os10g0569500	Os10t0569500	#N/A	#N/A	#N/A	#N/A
Os04g0474800	Os04t0474800	Os04t0474800	Os04t0474800	Os04t0474800	Os04t0474800
Os02g0216400	Os02t0216400	#N/A	#N/A	#N/A	#N/A
Os07g0519600	Os07t0519600	Os07t0519600	Os07t0519600	Os07t0519600	Os07t0519600
Os06g0591400	Os06t0591400	#N/A	#N/A	#N/A	#N/A
Os10g0570001	Os10t0570001	#N/A	#N/A	#N/A	#N/A
Os06g0486900	Os06t0486900	Os06t0486900	Os06t0486900	Os06t0486900	Os06t0486900
Os05g0424300	Os05t0424300	Os05t0424300	Os05t0424300	Os05t0424300	Os05t0424300
Os11g0598500	Os11t0598500	#N/A	#N/A	Os11t0598500	#N/A
Os04g0369066	Os04t0369066	Os04t0369066	Os04t0369066	Os04t0369066	Os04t0369066
Os12g0491800	Os12t0491800	#N/A	#N/A	Os12t0491800	Os12t0491800
Os11g0214900	Os11t0214900	#N/A	#N/A	Os11t0214900	#N/A
Os01g0558100	Os01t0558100	Os01t0558100	Os01t0558100	Os01t0558100	Os01t0558100
Os03g0235000	Os03t0235000	Os03t0235000	Os03t0235000	Os03t0235000	Os03t0235000
Os05g0432200	Os05t0432200	#N/A	#N/A	Os05t0432200	#N/A
Os04g0208450	Os04t0208450	#N/A	#N/A	#N/A	#N/A
Os09g0425200	Os09t0425200	Os09t0425200	Os09t0425200	Os09t0425200	Os09t0425200
Os04g0581000	Os04t0581000	Os04t0581000	Os04t0581000	Os04t0581000	Os04t0581000
Os08g0409900	Os08t0409900	Os08t0409900	Os08t0409900	Os08t0409900	Os08t0409900
Os11g0180800	Os11t0180800	#N/A	#N/A	#N/A	#N/A
Os10g0543400	Os10t0543400	Os10t0543400	Os10t0543400	Os10t0543400	Os10t0543400
Os03g0196400	Os03t0196400	#N/A	#N/A	Os03t0196400	#N/A
Os05g0331200	Os05t0331200	Os05t0331200	Os05t0331200	Os05t0331200	Os05t0331200
Os03g0300400	Os03t0300400	#N/A	#N/A	Os03t0300400	#N/A
Os05g0550300	Os05t0550300	#N/A	#N/A	Os05t0550300	#N/A
Os03g0347900	Os03t0347900	#N/A	#N/A	Os03t0347900	#N/A
Os12g0161500	Os12t0161500	#N/A	Os12t0161500	Os12t0161500	#N/A
Os02g0247000	Os02t0247000	#N/A	Os02t0247000	Os02t0247000	Os02t0247000
Os06g0726100	Os06t0726100	Os06t0726100	Os06t0726100	Os06t0726100	Os06t0726100
Os11g0548600	Os11t0548600	Os11t0548600	Os11t0548600	Os11t0548600	Os11t0548600
Os01g0633400	Os01t0633400	#N/A	Os01t0633400	Os01t0633400	Os01t0633400
Os01g0940800	Os01t0940800	#N/A	Os01t0940800	Os01t0940800	Os01t0940800
Os03g0197200	Os03t0197200	Os03t0197200	Os03t0197200	Os03t0197200	Os03t0197200
Os05g0509500	Os05t0509500	Os05t0509500	Os05t0509500	Os05t0509500	Os05t0509500
Os03g0348200	Os03t0348200	#N/A	#N/A	Os03t0348200	#N/A
Os08g0149000	Os08t0149000	#N/A	#N/A	#N/A	#N/A
Os06g0591200	Os06t0591200	#N/A	#N/A	#N/A	#N/A
Os06g0501900	Os06t0501900	Os06t0501900	Os06t0501900	Os06t0501900	Os06t0501900
Os10g0109600	Os10t0109600	Os10t0109600	Os10t0109600	Os10t0109600	Os10t0109600
Os07g0628500	Os07t0628500	Os07t0628500	Os07t0628500	Os07t0628500	Os07t0628500
Os09g0538000	Os09t0538000	Os09t0538000	#N/A	Os09t0538000	Os09t0538000
Os04g0532100	Os04t0532100	Os04t0532100	Os04t0532100	Os04t0532100	Os04t0532100
Os01g0162200	Os01t0162200	Os01t0162200	Os01t0162200	Os01t0162200	Os01t0162200
Os08g0230800	Os08t0230800	Os08t0230800	#N/A	Os08t0230800	Os08t0230800
Os08g0299801	Os08t0299801	#N/A	#N/A	#N/A	#N/A
Os12g0576100	Os12t0576100	#N/A	#N/A	#N/A	#N/A
Os07g0631700	Os07t0631700	Os07t0631700	#N/A	Os07t0631700	Os07t0631700
Os07g0418600	Os07t0418600	Os07t0418600	Os07t0418600	Os07t0418600	Os07t0418600
Os02g0793800	Os02t0793800	Os02t0793800	Os02t0793800	Os02t0793800	#N/A
Os09g0264400	Os09t0264400	Os09t0264400	Os09t0264400	Os09t0264400	Os09t0264400
Os09g0272600	Os09t0272600	#N/A	#N/A	#N/A	#N/A
Os11g0112200	Os11t0112200	Os11t0112200	Os11t0112200	Os11t0112200	Os11t0112200
Os04g0640700	Os04t0640700	Os04t0640700	#N/A	Os04t0640700	Os04t0640700
Os11g0590900	Os11t0590900	Os11t0590900	Os11t0590900	Os11t0590900	Os11t0590900
Os06g0329900	Os06t0329900	Os06t0329900	Os06t0329900	Os06t0329900	Os06t0329900
Os07g0131375	Os07t0131375	Os07t0131375	Os07t0131375	Os07t0131375	Os07t0131375
Os05g0395400	Os05t0395400	#N/A	#N/A	#N/A	#N/A
Os08g0167249	Os08t0167249	#N/A	Os08t0167249	Os08t0167249	#N/A
Os01g0791033	Os01t0791033	Os01t0791033	Os01t0791033	Os01t0791033	Os01t0791033
Os06g0314600	Os06t0314600	Os06t0314600	Os06t0314600	Os06t0314600	Os06t0314600
Os04g0280500	Os04t0280500	#N/A	Os04t0280500	Os04t0280500	Os04t0280500
Os04g0400000	Os04t0400000	#N/A	#N/A	#N/A	#N/A
Os09g0417500	Os09t0417500	Os09t0417500	Os09t0417500	Os09t0417500	Os09t0417500
Os07g0122000	Os07t0122000	#N/A	#N/A	#N/A	#N/A
Os11g0508600	Os11t0508600	Os11t0508600	Os11t0508600	Os11t0508600	Os11t0508600
Os09g0127300	Os09t0127300	Os09t0127300	Os09t0127300	Os09t0127300	Os09t0127300
Os11g0592600	Os11t0592600	Os11t0592600	#N/A	Os11t0592600	Os11t0592600
Os08g0404000	Os08t0404000	Os08t0404000	#N/A	Os08t0404000	Os08t0404000
Os07g0588100	Os07t0588100	Os07t0588100	Os07t0588100	Os07t0588100	Os07t0588100
Os09g0101300	Os09t0101300	#N/A	#N/A	#N/A	#N/A
Os12g0221400	Os12t0221400	Os12t0221400	#N/A	#N/A	#N/A
Os12g0595600	Os12t0595600	#N/A	#N/A	#N/A	#N/A
Os11g0214400	Os11t0214400	#N/A	#N/A	Os11t0214400	#N/A
Os08g0466200	Os08t0466200	Os08t0466200	#N/A	Os08t0466200	Os08t0466200
Os07g0689600	Os07t0689600	#N/A	#N/A	Os07t0689600	Os07t0689600
Os06g0273500	Os06t0273500	Os06t0273500	Os06t0273500	Os06t0273500	Os06t0273500
Os04g0105200	Os04t0105200	#N/A	#N/A	#N/A	#N/A
Os07g0679400	Os07t0679400	#N/A	#N/A	#N/A	#N/A
Os11g0669200	Os11t0669200	Os11t0669200	Os11t0669200	Os11t0669200	Os11t0669200
Os09g0275400	Os09t0275400	Os09t0275400	Os09t0275400	Os09t0275400	Os09t0275400
Os11g0649300	Os11t0649300	#N/A	#N/A	#N/A	#N/A
Os03g0604566	Os03t0604566	#N/A	Os03t0604566	#N/A	#N/A
Os11g0514400	Os11t0514400	Os11t0514400	Os11t0514400	Os11t0514400	Os11t0514400
Os04g0526300	Os04t0526300	Os04t0526300	#N/A	#N/A	Os04t0526300
Os01g0186000	Os01t0186000	Os01t0186000	Os01t0186000	Os01t0186000	#N/A
Os04g0688500	Os04t0688500	Os04t0688500	Os04t0688500	Os04t0688500	Os04t0688500
Os06g0708400	Os06t0708400	Os06t0708400	Os06t0708400	Os06t0708400	Os06t0708400
Os03g0396000	Os03t0396000	#N/A	#N/A	Os03t0396000	#N/A
Os05g0549800	Os05t0549800	Os05t0549800	Os05t0549800	Os05t0549800	Os05t0549800
Os01g0676900	Os01t0676900	#N/A	#N/A	Os01t0676900	#N/A
Os01g0924200	Os01t0924200	#N/A	#N/A	#N/A	#N/A
Os01g0551400	Os01t0551400	#N/A	#N/A	#N/A	#N/A
Os11g0124500	Os11t0124500	Os11t0124500	Os11t0124500	Os11t0124500	Os11t0124500
Os02g0713700	Os02t0713700	Os02t0713700	Os02t0713700	Os02t0713700	#N/A
Os03g0661900	Os03t0661900	#N/A	#N/A	#N/A	Os03t0661900
Os11g0637100	Os11t0637100	Os11t0637100	Os11t0637100	Os11t0637100	Os11t0637100
Os07g0674400	Os07t0674400	#N/A	Os07t0674400	#N/A	#N/A
Os01g0144800	Os01t0144800	#N/A	#N/A	#N/A	#N/A
Os09g0110300	Os09t0110300	Os09t0110300	#N/A	Os09t0110300	Os09t0110300
Os02g0570400	Os02t0570400	#N/A	#N/A	Os02t0570400	Os02t0570400
Os08g0170400	Os08t0170400	#N/A	Os08t0170400	Os08t0170400	#N/A
Os06g0565300	Os06t0565300	#N/A	#N/A	#N/A	#N/A
Os03g0624300	Os03t0624300	#N/A	#N/A	#N/A	#N/A
Os03g0188500	Os03t0188500	#N/A	#N/A	#N/A	#N/A
Os04g0678400	Os04t0678400	Os04t0678400	Os04t0678400	Os04t0678400	Os04t0678400
Os02g0244000	Os02t0244000	#N/A	#N/A	#N/A	#N/A
Os02g0575900	Os02t0575900	Os02t0575900	Os02t0575900	Os02t0575900	Os02t0575900
Os06g0674100	Os06t0674100	#N/A	#N/A	#N/A	#N/A
Os02g0564700	Os02t0564700	Os02t0564700	Os02t0564700	Os02t0564700	Os02t0564700
Os02g0811800	Os02t0811800	Os02t0811800	Os02t0811800	Os02t0811800	Os02t0811800
Os03g0771100	Os03t0771100	Os03t0771100	Os03t0771100	Os03t0771100	Os03t0771100
CAA34008	CAA34008	#N/A	#N/A	#N/A	#N/A
Os05g0472700	Os05t0472700	Os05t0472700	Os05t0472700	Os05t0472700	Os05t0472700
Os06g0147400	Os06t0147400	#N/A	#N/A	#N/A	#N/A
Os07g0122100	Os07t0122100	#N/A	#N/A	#N/A	#N/A
Os10g0490900	Os10t0490900	#N/A	#N/A	Os10t0490900	Os10t0490900
Os04g0369100	Os04t0369100	#N/A	#N/A	Os04t0369100	Os04t0369100
Os01g0832600	Os01t0832600	Os01t0832600	Os01t0832600	Os01t0832600	Os01t0832600
Os02g0607500	Os02t0607500	Os02t0607500	Os02t0607500	Os02t0607500	Os02t0607500
Os07g0560700	Os07t0560700	#N/A	#N/A	#N/A	#N/A
Os11g0701600	Os11t0701600	Os11t0701600	#N/A	#N/A	Os11t0701600
Os01g0902100	Os01t0902100	Os01t0902100	Os01t0902100	Os01t0902100	Os01t0902100
Os01g0137700	Os01t0137700	#N/A	#N/A	#N/A	#N/A
Os04g0506800	Os04t0506800	Os04t0506800	Os04t0506800	Os04t0506800	Os04t0506800
Os10g0490800	Os10t0490800	#N/A	#N/A	Os10t0490800	Os10t0490800
Os03g0262000	Os03t0262000	Os03t0262000	Os03t0262000	Os03t0262000	Os03t0262000
Os03g0109000	Os03t0109000	#N/A	Os03t0109000	Os03t0109000	Os03t0109000
Os04g0608900	Os04t0608900	Os04t0608900	Os04t0608900	Os04t0608900	Os04t0608900
Os03g0128932	Os03t0128932	Os03t0128932	Os03t0128932	Os03t0128932	Os03t0128932
#N/A indicates no homolog, protein ID indicates that it was found more than one homologs.
General Parameters
Max target sequences	100
Expect threshold	0.05
Scoring Parameters
Matrix	BLOSUM 62
Gap Costs	Exustence：11 E
Compositional adjustments	Conditional compositional score matrix adjustment

## Sheet: up genes
	BLASTP of up-regulated DEGs
Gene ID	Protein ID	Chlorophyta (taxid:3041)	charophytes (taxid:3146)	Bryophyta (taxid:3208)	Animalia (taxid:33208)
Os03g0115800	Os03t0115800	#N/A	#N/A	#N/A	#N/A
Os06g0597250	Os06t0597250	Os06t0597250	Os06t0597250	Os06t0597250	Os06t0597250
Os03g0299700	Os03t0299700	#N/A	#N/A	#N/A	#N/A
Os04g0397800	Os04t0397800	#N/A	#N/A	#N/A	#N/A
Os03g0629800	Os03t0629800	Os03t0629800	#N/A	#N/A	#N/A
Os07g0110000	Os07t0110000	#N/A	#N/A	#N/A	#N/A
Os01g0692400	Os01t0692400	#N/A	Os01t0692400	#N/A	#N/A
Os08g0496700	Os08t0496700	#N/A	#N/A	#N/A	#N/A
Os02g0258900	Os02t0258900	Os02t0258900	Os02t0258900	Os02t0258900	Os02t0258900
Os06g0246200	Os06t0246200	#N/A	#N/A	#N/A	#N/A
Os04g0483450	Os04t0483450	#N/A	#N/A	#N/A	#N/A
Os04g0223600	Os04t0223600	#N/A	#N/A	#N/A	#N/A
Os08g0246800	Os08t0246800	#N/A	#N/A	#N/A	#N/A
Os08g0246700	Os08t0246700	Os08t0246700	#N/A	#N/A	#N/A
Os05g0296200	Os05t0296200	#N/A	#N/A	#N/A	#N/A
Os12g0528801	Os12t0528801	#N/A	#N/A	#N/A	#N/A
Os04g0677000	Os04t0677000	#N/A	#N/A	#N/A	#N/A
Os06g0318533	Os06t0318533	#N/A	#N/A	#N/A	#N/A
Os09g0294000	Os09t0294000	Os09t0294000	Os09t0294000	Os09t0294000	Os09t0294000
Os04g0249600	Os04t0249600	Os04t0249600	Os04t0249600	Os04t0249600	Os04t0249600
Os12g0236100	Os12t0236100	Os12t0236100	Os12t0236100	Os12t0236100	#N/A
Os03g0251350	Os03t0251350	Os03t0251350	Os03t0251350	Os03t0251350	Os03t0251350
Os04g0390800	Os04t0390800	Os04t0390800	Os04t0390800	Os04t0390800	Os04t0390800
Os07g0532600	Os07t0532600	#N/A	#N/A	#N/A	#N/A
Os12g0169300	Os12t0169300	#N/A	#N/A	Os12t0169300	Os12t0169300
Os03g0303100	Os03t0303100	#N/A	#N/A	#N/A	#N/A
Os12g0516800	Os12t0516800	#N/A	Os12t0516800	Os12t0516800	#N/A
Os01g0647200	Os01t0647200	#N/A	#N/A	#N/A	#N/A
Os01g0191200	Os01t0191200	Os01t0191200	Os01t0191200	Os01t0191200	Os01t0191200
Os11g0576900	Os11t0576900	#N/A	#N/A	#N/A	#N/A
Os10g0111700	Os10t0111700	Os10t0111700	Os10t0111700	Os10t0111700	Os10t0111700
Os07g0457300	Os07t0457300	#N/A	#N/A	Os07t0457300	Os07t0457300
Os07g0589000	Os07t0589000	#N/A	Os07t0589000	Os07t0589000	#N/A
Os07g0533300	Os07t0533300	Os07t0533300	Os07t0533300	Os07t0533300	Os07t0533300
Os08g0193600	Os08t0193600	Os08t0193600	Os08t0193600	#N/A	Os08t0193600
Os10g0178500	Os10t0178500	Os10t0178500	#N/A	Os10t0178500	Os10t0178500
Os07g0457200	Os07t0457200	#N/A	#N/A	#N/A	#N/A
Os06g0516301	Os06t0516301	#N/A	#N/A	#N/A	#N/A
Os11g0471300	Os11t0471300	#N/A	#N/A	#N/A	#N/A
Os03g0105500	Os03t0105500	#N/A	#N/A	#N/A	#N/A
Os05g0166300	Os05t0166300	Os05t0166300	Os05t0166300	Os05t0166300	Os05t0166300
Os05g0326675	Os05t0326675	Os05t0326675	Os05t0326675	#N/A	#N/A
Os01g0122000	Os01t0122000	#N/A	#N/A	#N/A	Os01t0122000
Os04g0578600	Os04t0578600	Os04t0578600	Os04t0578600	Os04t0578600	Os04t0578600
Os07g0255200	Os07t0255200	Os07t0255200	Os07t0255200	Os07t0255200	Os07t0255200
Os01g0755700	Os01t0755700	Os01t0755700	Os01t0755700	Os01t0755700	Os01t0755700
Os08g0179000	Os08t0179000	Os08t0179000	Os08t0179000	Os08t0179000	Os08t0179000
Os07g0532500	Os07t0532500	Os07t0532500	Os07t0532500	Os07t0532500	Os07t0532500
Os12g0583300	Os12t0583300	Os12t0583300	Os12t0583300	Os12t0583300	Os12t0583300
Os05g0171200	Os05t0171200	Os05t0171200	#N/A	#N/A	#N/A
Os05g0590201	Os05t0590201	#N/A	#N/A	#N/A	#N/A
Os08g0240200	Os08t0240200	#N/A	#N/A	#N/A	#N/A
Os12g0236225	Os12t0236225	#N/A	#N/A	#N/A	#N/A
Os01g0727840	Os01t0727840	#N/A	#N/A	Os01t0727840	Os01t0727840
Os03g0101700	Os03t0101700	Os03t0101700	Os03t0101700	Os03t0101700	Os03t0101700
Os07g0533201	Os07t0533201	Os07t0533201	#N/A	Os07t0533201	#N/A
Os08g0170700	Os08t0170700	Os08t0170700	Os08t0170700	Os08t0170700	Os08t0170700
Os05g0375400	Os05t0375400	#N/A	Os05t0375400	Os05t0375400	Os05t0375400
Os12g0582700	Os12t0582700	Os12t0582700	Os12t0582700	Os12t0582700	Os12t0582700
Os04g0572100	Os04t0572100	#N/A	#N/A	#N/A	#N/A
Os02g0671300	Os02t0671300	#N/A	Os02t0671300	Os02t0671300	#N/A
Os11g0422000	Os11t0422000	#N/A	#N/A	#N/A	#N/A
Os02g0240300	Os02t0240300	Os02t0240300	Os02t0240300	Os02t0240300	Os02t0240300
Os05g0475700	Os05t0475700	Os05t0475700	Os05t0475700	Os05t0475700	Os05t0475700
Os09g0517000	Os09t0517000	#N/A	#N/A	#N/A	#N/A
Os05g0305200	Os05t0305200	Os05t0305200	Os05t0305200	Os05t0305200	Os05t0305200
Os07g0108100	Os07t0108100	Os07t0108100	#N/A	Os07t0108100	Os07t0108100
Os02g0772100	Os02t0772100	#N/A	#N/A	#N/A	#N/A
Os11g0285000	Os11t0285000	Os11t0285000	Os11t0285000	Os11t0285000	Os11t0285000
Os03g0251425	Os03t0251425	Os03t0251425	#N/A	Os03t0251425	#N/A
Os07g0575500	Os07t0575500	Os07t0575500	Os07t0575500	Os07t0575500	Os07t0575500
Os02g0198000	Os02t0198000	#N/A	#N/A	#N/A	#N/A
Os04g0223500	Os04t0223500	Os04t0223500	Os04t0223500	Os04t0223500	Os04t0223500
Os07g0141450	Os07t0141450	Os07t0141450	Os07t0141450	#N/A	Os07t0141450
Os11g0461000	Os11t0461000	Os11t0461000	Os11t0461000	Os11t0461000	Os11t0461000
Os01g0883000	Os01t0883000	Os01t0883000	Os01t0883000	Os01t0883000	Os01t0883000
Os02g0142250	Os02t0142250	#N/A	#N/A	Os02t0142250	#N/A
Os04g0401000	Os04t0401000	#N/A	#N/A	#N/A	#N/A
Os08g0136100	Os08t0136100	Os08t0136100	Os08t0136100	Os08t0136100	Os08t0136100
Os03g0736900	Os03t0736900	Os03t0736900	Os03t0736900	Os03t0736900	#N/A
Os09g0438100	Os09t0438100	#N/A	#N/A	#N/A	#N/A
Os10g0567900	Os10t0567900	#N/A	#N/A	#N/A	#N/A
Os09g0530200	Os09t0530200	Os09t0530200	Os09t0530200	Os09t0530200	Os09t0530200
Os07g0142100	Os07t0142100	#N/A	#N/A	#N/A	#N/A
Os03g0100020	Os03t0100020	#N/A	Os03t0100020	Os03t0100020	#N/A
Os10g0205700	Os10t0205700	#N/A	#N/A	#N/A	#N/A
Os02g0156000	Os02t0156000	Os02t0156000	Os02t0156000	Os02t0156000	Os02t0156000
Os04g0457000	Os04t0457000	Os04t0457000	Os04t0457000	Os04t0457000	Os04t0457000
Os04g0387000	Os04t0387000	#N/A	#N/A	#N/A	#N/A
Os03g0651950	Os03t0651950	#N/A	#N/A	#N/A	#N/A
Os02g0734400	Os02t0734400	Os02t0734400	Os02t0734400	Os02t0734400	#N/A
Os07g0607400	Os07t0607400	#N/A	Os07t0607400	Os07t0607400	Os07t0607400
Os08g0355400	Os08t0355400	#N/A	#N/A	#N/A	#N/A
Os07g0657100	Os07t0657100	Os07t0657100	Os07t0657100	Os07t0657100	Os07t0657100
Os08g0441100	Os08t0441100	Os08t0441100	Os08t0441100	Os08t0441100	Os08t0441100
Os08g0499300	Os08t0499300	Os08t0499300	Os08t0499300	Os08t0499300	#N/A
Os03g0304500	Os03t0304500	Os03t0304500	Os03t0304500	Os03t0304500	#N/A
Os03g0282300	Os03t0282300	#N/A	#N/A	#N/A	#N/A
Os05g0542300	Os05t0542300	#N/A	#N/A	#N/A	#N/A
Os05g0555600	Os05t0555600	Os05t0555600	Os05t0555600	Os05t0555600	Os05t0555600
Os08g0126700	Os08t0126700	Os08t0126700	Os08t0126700	Os08t0126700	Os08t0126700
Os05g0269200	Os05t0269200	Os05t0269200	#N/A	Os05t0269200	#N/A
Os08g0200750	Os08t0200750	#N/A	#N/A	#N/A	#N/A
Os06g0299100	Os06t0299100	Os06t0299100	Os06t0299100	Os06t0299100	Os06t0299100
Os06g0536333	Os06t0536333	Os06t0536333	Os06t0536333	Os06t0536333	Os06t0536333
Os12g0554100	Os12t0554100	#N/A	Os12t0554100	Os12t0554100	#N/A
Os01g0495701	Os01t0495701	#N/A	#N/A	#N/A	#N/A
Os08g0240000	Os08t0240000	Os08t0240000	#N/A	#N/A	Os08t0240000
Os03g0842501	Os03t0842501	#N/A	#N/A	#N/A	#N/A
Os08g0508700	Os08t0508700	#N/A	Os08t0508700	Os08t0508700	#N/A
Os04g0606000	Os04t0606000	Os04t0606000	Os04t0606000	Os04t0606000	Os04t0606000
Os01g0232000	Os01t0232000	Os01t0232000	Os01t0232000	Os01t0232000	Os01t0232000
Os01g0669100	Os01t0669100	Os01t0669100	Os01t0669100	Os01t0669100	Os01t0669100
Os04g0470801	Os04t0470801	#N/A	#N/A	#N/A	#N/A
Os05g0249500	Os05t0249500	#N/A	Os05t0249500	#N/A	#N/A
Os02g0827400	Os02t0827400	Os02t0827400	#N/A	Os02t0827400	#N/A
Os03g0115700	Os03t0115700	Os03t0115700	Os03t0115700	Os03t0115700	Os03t0115700
Os01g0136100	Os01t0136100	Os01t0136100	Os01t0136100	Os01t0136100	Os01t0136100
Os02g0690000	Os02t0690000	#N/A	#N/A	Os02t0690000	#N/A
Os06g0667200	Os06t0667200	Os06t0667200	Os06t0667200	Os06t0667200	Os06t0667200
Os12g0152100	Os12t0152100	Os12t0152100	Os12t0152100	Os12t0152100	Os12t0152100
Os10g0486300	Os10t0486300	Os10t0486300	#N/A	Os10t0486300	Os10t0486300
Os01g0952800	Os01t0952800	#N/A	#N/A	Os01t0952800	Os01t0952800
Os06g0108500	Os06t0108500	Os06t0108500	Os06t0108500	Os06t0108500	Os06t0108500
Os01g0356951	Os01t0356951	#N/A	#N/A	#N/A	#N/A
Os01g0845950	Os01t0845950	#N/A	#N/A	#N/A	#N/A
Os01g0806000	Os01t0806000	Os01t0806000	Os01t0806000	Os01t0806000	Os01t0806000
Os07g0537500	Os07t0537500	Os07t0537500	Os07t0537500	Os07t0537500	Os07t0537500
Os01g0197450	Os01t0197450	Os01t0197450	Os01t0197450	Os01t0197450	Os01t0197450
Os08g0495300	Os08t0495300	#N/A	#N/A	#N/A	#N/A
Os07g0181200	Os07t0181200	#N/A	#N/A	#N/A	#N/A
Os01g0566800	Os01t0566800	Os01t0566800	Os01t0566800	Os01t0566800	Os01t0566800
Os07g0117300	Os07t0117300	Os07t0117300	Os07t0117300	Os07t0117300	#N/A
Os06g0188400	Os06t0188400	#N/A	#N/A	Os06t0188400	Os06t0188400
Os07g0631950	Os07t0631950	#N/A	#N/A	#N/A	#N/A
Os03g0751100	Os03t0751100	#N/A	#N/A	Os03t0751100	Os03t0751100
Os03g0440200	Os03t0440200	Os03t0440200	Os03t0440200	Os03t0440200	Os03t0440200
Os02g0526700	Os02t0526700	#N/A	#N/A	#N/A	#N/A
Os11g0118500	Os11t0118500	#N/A	Os11t0118500	Os11t0118500	Os11t0118500
Os05g0405400	Os05t0405400	#N/A	#N/A	#N/A	#N/A
Os02g0611500	Os02t0611500	Os02t0611500	Os02t0611500	Os02t0611500	Os02t0611500
Os01g0600900	Os01t0600900	Os01t0600900	Os01t0600900	Os01t0600900	Os01t0600900
Os12g0111000	Os12t0111000	#N/A	#N/A	#N/A	#N/A
Os09g0325366	Os09t0325366	#N/A	#N/A	#N/A	#N/A
Os02g0578000	Os02t0578000	#N/A	#N/A	#N/A	#N/A
Os05g0587300	Os05t0587300	Os05t0587300	Os05t0587300	Os05t0587300	Os05t0587300
Os12g0508400	Os12t0508400	#N/A	#N/A	#N/A	#N/A
Os03g0861400	Os03t0861400	#N/A	#N/A	Os03t0861400	#N/A
Os08g0158600	Os08t0158600	#N/A	#N/A	#N/A	#N/A
Os03g0667500	Os03t0667500	Os03t0667500	Os03t0667500	Os03t0667500	Os03t0667500
Os03g0798300	Os03t0798300	Os03t0798300	Os03t0798300	Os03t0798300	Os03t0798300
Os05g0363951	Os05t0363951	#N/A	#N/A	#N/A	#N/A
Os11g0621825	Os11t0621825	Os11t0621825	Os11t0621825	Os11t0621825	Os11t0621825
Os02g0649900	Os02t0649900	Os02t0649900	#N/A	Os02t0649900	Os02t0649900
Os07g0297200	Os07t0297200	#N/A	#N/A	#N/A	#N/A
Os01g0613500	Os01t0613500	Os01t0613500	Os01t0613500	Os01t0613500	Os01t0613500
Os01g0577300	Os01t0577300	Os01t0577300	Os01t0577300	Os01t0577300	Os01t0577300
Os10g0516600	Os10t0516600	#N/A	Os10t0516600	Os10t0516600	#N/A
Os01g0715900	Os01t0715900	Os01t0715900	Os01t0715900	Os01t0715900	Os01t0715900
Os04g0272200	Os04t0272200	#N/A	#N/A	Os04t0272200	Os04t0272200
Os06g0602400	Os06t0602400	Os06t0602400	Os06t0602400	Os06t0602400	Os06t0602400
Os02g0212975	Os02t0212975	#N/A	#N/A	#N/A	#N/A
Os07g0142802	Os07t0142802	#N/A	#N/A	#N/A	#N/A
Os08g0137400	Os08t0137400	Os08t0137400	#N/A	Os08t0137400	#N/A
Os06g0561800	Os06t0561800	Os06t0561800	Os06t0561800	Os06t0561800	Os06t0561800
Os04g0483500	Os04t0483500	Os04t0483500	Os04t0483500	Os04t0483500	Os04t0483500
Os12g0569700	Os12t0569700	Os12t0569700	Os12t0569700	Os12t0569700	Os12t0569700
Os06g0478600	Os06t0478600	Os06t0478600	Os06t0478600	Os06t0478600	Os06t0478600
Os01g0511800	Os01t0511800	#N/A	#N/A	#N/A	#N/A
Os05g0408900	Os05t0408900	Os05t0408900	Os05t0408900	Os05t0408900	Os05t0408900
Os12g0600100	Os12t0600100	Os12t0600100	Os12t0600100	Os12t0600100	Os12t0600100
Os10g0459300	Os10t0459300	Os10t0459300	Os10t0459300	Os10t0459300	Os10t0459300
Os12g0152200	Os12t0152200	#N/A	Os12t0152200	Os12t0152200	#N/A
Os03g0636800	Os03t0636800	Os03t0636800	Os03t0636800	Os03t0636800	Os03t0636800
Os05g0590100	Os05t0590100	Os05t0590100	Os05t0590100	Os05t0590100	Os05t0590100
Os08g0462300	Os08t0462300	#N/A	#N/A	#N/A	#N/A
Os10g0475100	Os10t0475100	Os10t0475100	#N/A	Os10t0475100	Os10t0475100
Os05g0398800	Os05t0398800	Os05t0398800	Os05t0398800	Os05t0398800	Os05t0398800
Os12g0194900	Os12t0194900	Os12t0194900	#N/A	Os12t0194900	Os12t0194900
#N/A indicates no homolog, protein ID indicates that it was found more than one homologs.
General Parameters
Max target sequences	100
Expect threshold	0.05
Scoring Parameters
Matrix	BLOSUM 62
Gap Costs	Exustence：11 E
Compositional adjustments	Conditional compositional score matrix adjustment
