# Supplementary material for: Overexpressing PpBURP2 in Rice Increases Plant Defense to Abiotic Stress and Bacterial Leaf Blight
Source: Front Plant Sci. 2022 May 6;13:812279. doi: 10.3389/fpls.2022.812279 (PMC9121072; doi:10.3389/fpls.2022.812279)
Supplement: Supplementary file 6 [file Table_5.xlsx]

## Sheet: Sheet1
Category	GO.ID	Term	Up	Down	DEG	Total	Pvalue	FDR	Up_Gene	Down_Gene
MF	GO:0010333	terpene synthase activity	0	4	4	43	0.00095	0.272131	-	Os02g0570400(ENT-KAURENE SYNTHASE 7),Os03g0347900,Os03g0348200(terpene synthase 10),Os12g0491800(KAURENE SYNTHASE-LIKE 10)
CC	GO:0071944	cell periphery	20	21	41	2948	0.0011	0.272131	Os01g0232000(TONOPLAST INTRINSIC PROTEIN 4;3),Os01g0669100(Large spike S-domain receptor like Kinase 1),Os01g0883000(RECEPTOR-LIKE CYTOPLASMIC KINASE 50),Os02g0156000(RECEPTOR-LIKE CYTOPLASMIC KINASE 62),Os02g0649900(YELLOW STRIP-LIKE GENE 2),Os03g0100020(TETRASPANIN 4),Os03g0667500(ZINC TRANSPORTER 10),Os03g0751100("Oligopeptide Transporter),Os05g0166300,Os05g0269200,Os05g0375400("(1),Os05g03988…	Os01g0940800("beta-1),Os02g0247000,Os02g0575900(EXOCYST SUBUNIT EXO70 FAMILY PROTEIN FX6),Os03g0128932,Os03g0196400,Os03g0197200,Os04g0369066(RECEPTOR-LIKE CYTOPLASMIC KINASE 144),Os04g0369100(RECEPTOR-LIKE CYTOPLASMIC KINASE 145),Os04g0640700,Os04g0688500(class III peroxidase 62),Os05g0472400("zinc transporter 9),Os05g0472700(ZINC TRANSPORTER 5),Os06g0708400(CYCLOPHILIN 19-4),Os07g0131375,Os08g0…
BP	GO:0006829	zinc II ion transport	1	2	3	23	0.0013	0.272131	Os03g0667500(ZINC TRANSPORTER 10)	Os05g0472400("zinc transporter 9),Os05g0472700(ZINC TRANSPORTER 5)
BP	GO:0071577	zinc II ion transmembrane transport	1	2	3	23	0.0013	0.272131	Os03g0667500(ZINC TRANSPORTER 10)	Os05g0472400("zinc transporter 9),Os05g0472700(ZINC TRANSPORTER 5)
CC	GO:0005886	plasma membrane	19	17	36	2504	0.0013	0.272131	Os01g0232000(TONOPLAST INTRINSIC PROTEIN 4;3),Os01g0669100(Large spike S-domain receptor like Kinase 1),Os01g0883000(RECEPTOR-LIKE CYTOPLASMIC KINASE 50),Os02g0156000(RECEPTOR-LIKE CYTOPLASMIC KINASE 62),Os02g0649900(YELLOW STRIP-LIKE GENE 2),Os03g0100020(TETRASPANIN 4),Os03g0667500(ZINC TRANSPORTER 10),Os03g0751100("Oligopeptide Transporter),Os05g0166300,Os05g0269200,Os05g0375400("(1),Os05g03988…	Os01g0940800("beta-1),Os02g0247000,Os03g0128932,Os03g0196400,Os03g0197200,Os04g0369066(RECEPTOR-LIKE CYTOPLASMIC KINASE 144),Os04g0369100(RECEPTOR-LIKE CYTOPLASMIC KINASE 145),Os05g0472400("zinc transporter 9),Os05g0472700(ZINC TRANSPORTER 5),Os06g0708400(CYCLOPHILIN 19-4),Os07g0131375,Os08g0230800(Lectin Receptor Kinase paralog),Os11g0508600(11N3),Os11g0598500,Os11g0637100,Os11g0669200(RECEPTOR-…
MF	GO:0016838	carbon-oxygen lyase activity, acting on phosphates	0	4	4	48	0.00144	0.272131	-	Os02g0570400(ENT-KAURENE SYNTHASE 7),Os03g0347900,Os03g0348200(terpene synthase 10),Os12g0491800(KAURENE SYNTHASE-LIKE 10)
MF	GO:0005385	zinc ion transmembrane transporter activity	1	2	3	23	0.00159	0.272131	Os03g0667500(ZINC TRANSPORTER 10)	Os05g0472400("zinc transporter 9),Os05g0472700(ZINC TRANSPORTER 5)
BP	GO:0055065	metal ion homeostasis	5	2	7	184	0.0019	0.272131	Os02g0649900(YELLOW STRIP-LIKE GENE 2),Os03g0667500(ZINC TRANSPORTER 10),Os03g0751100("Oligopeptide Transporter),Os03g0861400,Os04g0401000(PYRICULARIA ORYZAE RESISTANCE 21)	Os04g0400000,Os11g0124500
MF	GO:0004563	beta-N-acetylhexosaminidase activity	1	1	2	7	0.0021	0.272131	Os07g0575500(beta-hexosaminidase precursor)	Os06g0726100(CHITINASE 3)
MF	GO:0015929	hexosaminidase activity	1	1	2	7	0.0021	0.272131	Os07g0575500	Os06g0726100(CHITINASE 3)
BP	GO:0034219	carbohydrate transmembrane transport	0	5	5	97	0.0023	0.272131	-	Os03g0128932,Os03g0197200,Os11g0508600(11N3),Os11g0637100,Os12g0476200(SWEET13)
BP	GO:0055076	transition metal ion homeostasis	5	1	6	144	0.0025	0.272131	Os02g0649900(YELLOW STRIP-LIKE GENE 2),Os03g0667500(ZINC TRANSPORTER 10),Os03g0751100("Oligopeptide Transporter),Os03g0861400,Os04g0401000(PYRICULARIA ORYZAE RESISTANCE 21)	Os04g0400000(basic proline-rich protein)
CC	GO:0031224	intrinsic component of membrane	47	36	83	7558	0.003	0.272131	Os01g0122000("OsPR5),Os01g0197450,Os01g0232000(TONOPLAST INTRINSIC PROTEIN 4;3),Os01g0600900(CHLOROPHYLL A/B BINDING PROTEIN 2R),Os01g0669100(Large spike S-domain receptor like Kinase 1),Os01g0755700,Os01g0806000,Os01g0883000(RECEPTOR-LIKE CYTOPLASMIC KINASE 50),Os02g0142250,Os02g0156000(RECEPTOR-LIKE CYTOPLASMIC KINASE 62),Os02g0198000,Os02g0649900(YELLOW STRIP-LIKE GENE 2),Os03g0100020(TETRASPA…	Os01g0115600(RECEPTOR-LIKE CYTOPLASMIC KINASE 11),Os01g0144800,Os01g0162200,Os01g0902100(MULTIDRUG RESISTANCE-ASSOCIATED PROTEIN 2),Os01g0924200,Os01g0940800("beta-1),Os02g0247000,Os02g0621300("ECERIFERUM 1),Os03g0128932,Os03g0196400,Os03g0197200,Os04g0369066(RECEPTOR-LIKE CYTOPLASMIC KINASE 144),Os04g0506800(STLP3),Os05g0472400("zinc transporter 9),Os05g0472700(ZINC TRANSPORTER 5),Os05g0549800(A…
BP	GO:0050801	ion homeostasis	6	2	8	261	0.0034	0.272131	Os02g0649900(YELLOW STRIP-LIKE GENE 2),Os03g0667500(ZINC TRANSPORTER 10),Os03g0751100("Oligopeptide Transporter),Os03g0861400,Os04g0401000(PYRICULARIA ORYZAE RESISTANCE 21),Os05g0269200	Os04g0400000,Os11g0124500
BP	GO:0006873	cellular ion homeostasis	5	2	7	206	0.0035	0.272131	Os02g0649900(YELLOW STRIP-LIKE GENE 2),Os03g0751100("Oligopeptide Transporter),Os03g0861400,Os04g0401000(PYRICULARIA ORYZAE RESISTANCE 21),Os05g0269200	Os04g0400000,Os11g0124500
MF	GO:0045703	ketoreductase activity	2	0	2	9	0.00355	0.272131	Os04g0483500("beta-ketoacyl-CoA reductase 1),Os06g0299100	-
BP	GO:0055114	oxidation-reduction process	13	19	32	2082	0.0037	0.272131	Os02g0240300(class III peroxidase 29),Os02g0734400,Os03g0115700,Os04g0223500,Os04g0390800,Os04g0483500("beta-ketoacyl-CoA reductase 1),Os04g0578600(FERRIC REDUCTASE 2),Os05g0555600(NADH-DEPENDENT GLUTAMATE SYNTHASE 2),Os06g0299100,Os08g0137400(UCLACYANIN-LIKE PROTEIN 23),Os09g0294000,Os10g0475100,Os12g0582700	Os01g0832600,Os02g0621300("ECERIFERUM 1),Os02g0811800(CINNAMOYL-COA REDUCTASE 10),Os03g0235000(PEROXIDASE N),Os04g0532100,Os04g0581000,Os04g0688500(class III peroxidase 62),Os05g0331200,Os05g0424300,Os06g0129100,Os06g0486900("FDH2),Os06g0501900(P-450 76M9),Os07g0519600,Os09g0127300,Os09g0264400,Os09g0275400,Os10g0109600(PEROXIDASE A),Os10g0558750,Os11g0112200(class III peroxidase 131)
BP	GO:0006875	cellular metal ion homeostasis	4	2	6	157	0.0038	0.272131	Os02g0649900(YELLOW STRIP-LIKE GENE 2),Os03g0751100("Oligopeptide Transporter),Os03g0861400,Os04g0401000(PYRICULARIA ORYZAE RESISTANCE 21)	Os04g0400000,Os11g0124500
MF	GO:0051119	sugar transmembrane transporter activity	0	5	5	102	0.00392	0.272131	-	Os03g0128932,Os03g0197200,Os11g0508600(11N3),Os11g0637100,Os12g0476200(SWEET13)
MF	GO:0015144	carbohydrate transmembrane transporter activity	0	5	5	107	0.00481	0.288226	-	Os03g0128932,Os03g0197200,Os11g0508600(11N3),Os11g0637100,Os12g0476200(SWEET13)
BP	GO:0055072	iron ion homeostasis	3	0	3	37	0.0051	0.288226	Os02g0649900(YELLOW STRIP-LIKE GENE 2),Os03g0667500(ZINC TRANSPORTER 10),Os03g0751100("Oligopeptide Transporter)	-
BP	GO:0055082	cellular chemical homeostasis	5	2	7	223	0.0054	0.288226	Os02g0649900(YELLOW STRIP-LIKE GENE 2),Os03g0751100("Oligopeptide Transporter),Os03g0861400,Os04g0401000(PYRICULARIA ORYZAE RESISTANCE 21),Os05g0269200	Os04g0400000,Os11g0124500
BP	GO:0019748	secondary metabolic process	3	6	9	343	0.0054	0.288226	Os01g0952800(basic helix-loop-helix protein 056),Os11g0461000(SERINE CARBOXYPEPTIDASE 61),Os12g0582700	Os01g0558100(TAU GLUTATHIONE S-TRANSFERASE 6),Os02g0811800(CINNAMOYL-COA REDUCTASE 10),Os05g0424300,Os06g0501900(P-450 76M9),Os09g0264400,Os09g0275400
MF	GO:0046915	transition metal ion transmembrane transporter activity	2	2	4	69	0.0054	0.288226	Os03g0667500(ZINC TRANSPORTER 10),Os03g0751100("Oligopeptide Transporter)	Os05g0472400("zinc transporter 9),Os05g0472700(ZINC TRANSPORTER 5)
BP	GO:0048878	chemical homeostasis	6	3	9	350	0.0062	0.288226	Os02g0649900(YELLOW STRIP-LIKE GENE 2),Os03g0667500(ZINC TRANSPORTER 10),Os03g0751100("Oligopeptide Transporter),Os03g0861400,Os04g0401000(PYRICULARIA ORYZAE RESISTANCE 21),Os05g0269200	Os04g0400000,Os07g0519600,Os11g0124500
BP	GO:0044550	secondary metabolite biosynthetic process	2	5	7	229	0.0062	0.288226	Os01g0952800(basic helix-loop-helix protein 056),Os12g0582700	Os02g0811800(CINNAMOYL-COA REDUCTASE 10),Os05g0424300,Os06g0501900(P-450 76M9),Os09g0264400,Os09g0275400
BP	GO:0000041	transition metal ion transport	2	2	4	81	0.0073	0.288226	Os03g0667500(ZINC TRANSPORTER 10),Os03g0751100("Oligopeptide Transporter)	Os05g0472400("zinc transporter 9),Os05g0472700(ZINC TRANSPORTER 5)
CC	GO:0016021	integral component of membrane	45	35	80	7437	0.0073	0.288226	Os01g0122000("OsPR5),Os01g0197450,Os01g0232000(TONOPLAST INTRINSIC PROTEIN 4;3),Os01g0600900(CHLOROPHYLL A/B BINDING PROTEIN 2R),Os01g0669100(Large spike S-domain receptor like Kinase 1),Os01g0755700,Os01g0806000,Os01g0883000(RECEPTOR-LIKE CYTOPLASMIC KINASE 50),Os02g0142250,Os02g0156000(RECEPTOR-LIKE CYTOPLASMIC KINASE 62),Os02g0198000,Os02g0649900(YELLOW STRIP-LIKE GENE 2),Os03g0100020(TETRASPA…	Os01g0115600(RECEPTOR-LIKE CYTOPLASMIC KINASE 11),Os01g0144800,Os01g0162200,Os01g0902100(MULTIDRUG RESISTANCE-ASSOCIATED PROTEIN 2),Os01g0924200,Os02g0247000,Os02g0621300("ECERIFERUM 1),Os03g0128932,Os03g0196400,Os03g0197200,Os04g0369066(RECEPTOR-LIKE CYTOPLASMIC KINASE 144),Os04g0506800(STLP3),Os05g0472400("zinc transporter 9),Os05g0472700(ZINC TRANSPORTER 5),Os05g0549800(APETALA2/ETHYLENE-RESPO…
BP	GO:0055080	cation homeostasis	5	2	7	238	0.0076	0.288226	Os02g0649900(YELLOW STRIP-LIKE GENE 2),Os03g0667500(ZINC TRANSPORTER 10),Os03g0751100("Oligopeptide Transporter),Os03g0861400,Os04g0401000(PYRICULARIA ORYZAE RESISTANCE 21)	Os04g0400000,Os11g0124500
BP	GO:0006811	ion transport	10	8	18	1018	0.0078	0.288226	Os01g0232000(TONOPLAST INTRINSIC PROTEIN 4;3),Os02g0649900(YELLOW STRIP-LIKE GENE 2),Os03g0667500(ZINC TRANSPORTER 10),Os03g0751100("Oligopeptide Transporter),Os03g0861400,Os04g0401000(PYRICULARIA ORYZAE RESISTANCE 21),Os05g0269200,Os06g0188400(Glutamate receptor homolog 4.1),Os10g0111700,Os12g0194900("amino acid permease 10B)	Os03g0128932,Os03g0197200,Os04g0400000,Os05g0472400("zinc transporter 9),Os05g0472700(ZINC TRANSPORTER 5),Os07g0519600,Os08g0466200(HIGH-AFFINITY POTASSIUM(K+) TRANSPORTER 4),Os11g0637100
CC	GO:0044425	membrane part	47	37	84	7908	0.0078	0.288226	Os01g0122000("OsPR5),Os01g0197450,Os01g0232000(TONOPLAST INTRINSIC PROTEIN 4;3),Os01g0600900(CHLOROPHYLL A/B BINDING PROTEIN 2R),Os01g0669100(Large spike S-domain receptor like Kinase 1),Os01g0755700,Os01g0806000,Os01g0883000(RECEPTOR-LIKE CYTOPLASMIC KINASE 50),Os02g0142250,Os02g0156000(RECEPTOR-LIKE CYTOPLASMIC KINASE 62),Os02g0198000,Os02g0649900(YELLOW STRIP-LIKE GENE 2),Os03g0100020(TETRASPA…	Os01g0115600(RECEPTOR-LIKE CYTOPLASMIC KINASE 11),Os01g0144800,Os01g0162200,Os01g0902100(MULTIDRUG RESISTANCE-ASSOCIATED PROTEIN 2),Os01g0924200,Os01g0940800("beta-1),Os02g0247000,Os02g0621300("ECERIFERUM 1),Os03g0128932,Os03g0196400,Os03g0197200,Os04g0369000(RECEPTOR-LIKE CYTOPLASMIC KINASE 144),Os04g0369066(RECEPTOR-LIKE CYTOPLASMIC KINASE 144),Os04g0506800(STLP3),Os05g0472400("zinc transporter…
MF	GO:0046983	protein dimerization activity	9	3	12	528	0.00813	0.288226	Os01g0566800(basic helix-loop-helix protein 117),Os01g0577300(TRANSCRIPTIONAL ACTIVATOR B),Os01g0952800(basic helix-loop-helix protein 056),Os02g0671300(basic helix-loop-helix protein 076),Os03g0251350(HAP5C SUBUNIT OF CCAAT-BOX BINDING COMPLEX),Os03g0251425,Os06g0108500,Os06g0667200(MADS BOX GENE 30),Os10g0567900	Os02g0564700(basic helix-loop-helix protein 097),Os07g0628500("basic Helix-Loop-Helix protein 1),Os09g0344500("O-methyltransferase ZRP4)
BP	GO:0008643	carbohydrate transport	0	5	5	132	0.0084	0.288226	-	Os03g0128932,Os03g0197200,Os11g0508600(11N3),Os11g0637100,Os12g0476200(SWEET13)
MF	GO:0016491	oxidoreductase activity	13	18	31	1950	0.00842	0.288226	Os02g0240300(class III peroxidase 29),Os02g0734400,Os03g0115700,Os04g0223500,Os04g0390800,Os04g0483500("beta-ketoacyl-CoA reductase 1),Os04g0578600(FERRIC REDUCTASE 2),Os05g0555600(NADH-DEPENDENT GLUTAMATE SYNTHASE 2),Os06g0299100,Os08g0137400(UCLACYANIN-LIKE PROTEIN 23),Os09g0294000,Os10g0475100,Os12g0582700	Os01g0832600,Os02g0621300("ECERIFERUM 1),Os02g0811800(CINNAMOYL-COA REDUCTASE 10),Os03g0235000(PEROXIDASE N),Os04g0581000,Os04g0688500(class III peroxidase 62),Os05g0331200,Os05g0424300,Os06g0129100,Os06g0486900("FDH2),Os06g0501900(P-450 76M9),Os07g0519600,Os09g0127300,Os09g0264400,Os09g0275400,Os10g0109600(PEROXIDASE A),Os10g0558750,Os11g0112200(class III peroxidase 131)
BP	GO:0098771	inorganic ion homeostasis	5	2	7	244	0.0086	0.288226	Os02g0649900(YELLOW STRIP-LIKE GENE 2),Os03g0667500(ZINC TRANSPORTER 10),Os03g0751100("Oligopeptide Transporter),Os03g0861400,Os04g0401000(PYRICULARIA ORYZAE RESISTANCE 21)	Os04g0400000,Os11g0124500
BP	GO:0009828	plant-type cell wall loosening	1	0	1	1	0.0095	0.288226	Os09g0530200(glycoside hydrolase OsGH9B14)	-
BP	GO:1900704	regulation of siderophore biosynthetic process	1	0	1	1	0.0095	0.288226	Os01g0952800(basic helix-loop-helix protein 056)	-
BP	GO:1900706	positive regulation of siderophore biosynthetic process	1	0	1	1	0.0095	0.288226	Os01g0952800(basic helix-loop-helix protein 056)	-
BP	GO:1990059	fruit valve development	1	0	1	1	0.0095	0.288226	Os09g0530200(glycoside hydrolase OsGH9B14)	-
BP	GO:1990388	xylem-to-phloem iron transport	1	0	1	1	0.0095	0.288226	Os03g0751100("Oligopeptide Transporter)	-
BP	GO:0009768	photosynthesis, light harvesting in photosystem I	2	0	2	16	0.0098	0.288226	Os01g0600900(CHLOROPHYLL A/B BINDING PROTEIN 2R),Os04g0457000("light-harvesting protein CP24)	-
MF	GO:0034277	ent-cassa-12,15-diene synthase activity	0	1	1	1	0.01019	0.288226	-	Os02g0570400(ENT-KAURENE SYNTHASE 7)
MF	GO:0034280	ent-sandaracopimaradiene synthase activity	0	1	1	1	0.01019	0.288226	-	Os12g0491800(KAURENE SYNTHASE-LIKE 10)
MF	GO:0042972	licheninase activity	1	0	1	1	0.01019	0.288226	Os05g0375400("(1)	-
MF	GO:0102064	gamma-curcumene synthase activity	0	1	1	1	0.01019	0.288226	-	Os12g0491800(KAURENE SYNTHASE-LIKE 10)
BP	GO:0030003	cellular cation homeostasis	4	2	6	194	0.0104	0.288226	Os02g0649900(YELLOW STRIP-LIKE GENE 2),Os03g0751100("Oligopeptide Transporter),Os03g0861400,Os04g0401000(PYRICULARIA ORYZAE RESISTANCE 21)	Os04g0400000,Os11g0124500
BP	GO:0042430	indole-containing compound metabolic process	1	2	3	48	0.0105	0.288226	Os12g0582700	Os09g0110300(cyclase-like 4),Os09g0344500("O-methyltransferase ZRP4)
MF	GO:0046906	tetrapyrrole binding	4	9	13	616	0.01074	0.288226	Os01g0600900(CHLOROPHYLL A/B BINDING PROTEIN 2R),Os02g0240300(class III peroxidase 29),Os04g0457000("light-harvesting protein CP24),Os12g0582700	Os03g0235000(PEROXIDASE N),Os04g0688500(class III peroxidase 62),Os05g0424300,Os06g0501900(P-450 76M9),Os07g0519600,Os09g0264400,Os09g0275400,Os10g0109600(PEROXIDASE A),Os11g0112200(class III peroxidase 131)
MF	GO:0031409	pigment binding	2	0	2	16	0.01129	0.288226	Os01g0600900(CHLOROPHYLL A/B BINDING PROTEIN 2R),Os04g0457000("light-harvesting protein CP24)	-
BP	GO:0006026	aminoglycan catabolic process	0	3	3	50	0.0118	0.288226	-	Os06g0726100(CHITINASE 3),Os10g0543400(CHIT15 - Chitinase family protein),Os11g0701600
BP	GO:0006030	chitin metabolic process	0	3	3	50	0.0118	0.288226	-	Os06g0726100(CHITINASE 3),Os10g0543400,Os11g0701600
BP	GO:0006032	chitin catabolic process	0	3	3	50	0.0118	0.288226	-	Os06g0726100(CHITINASE 3),Os10g0543400,Os11g0701600
BP	GO:0046348	amino sugar catabolic process	0	3	3	50	0.0118	0.288226	-	Os06g0726100(CHITINASE 3),Os10g0543400,Os11g0701600
BP	GO:1901072	glucosamine-containing compound catabolic process	0	3	3	50	0.0118	0.288226	-	Os06g0726100(CHITINASE 3),Os10g0543400,Os11g0701600
BP	GO:0016102	diterpenoid biosynthetic process	0	3	3	51	0.0124	0.297375	-	Os02g0570400(ENT-KAURENE SYNTHASE 7),Os06g0501900(P-450 76M9),Os12g0491800(KAURENE SYNTHASE-LIKE 10)
BP	GO:0030001	metal ion transport	4	4	8	327	0.0127	0.29913	Os03g0667500(ZINC TRANSPORTER 10),Os03g0751100("Oligopeptide Transporter),Os03g0861400,Os04g0401000(PYRICULARIA ORYZAE RESISTANCE 21)	Os04g0400000,Os05g0472400("zinc transporter 9),Os05g0472700(ZINC TRANSPORTER 5),Os08g0466200(HIGH-AFFINITY POTASSIUM(K+) TRANSPORTER 4)
CC	GO:0044459	plasma membrane part	3	7	10	512	0.0137	0.317023	Os01g0232000(TONOPLAST INTRINSIC PROTEIN 4;3),Os05g0375400("(1),Os08g0137400(UCLACYANIN-LIKE PROTEIN 23)	Os01g0940800("beta-1),Os02g0247000,Os03g0128932,Os03g0197200,Os11g0508600(11N3),Os11g0637100,Os12g0476200(SWEET13)
CC	GO:0031226	intrinsic component of plasma membrane	3	6	9	443	0.0151	0.343395	Os01g0232000(TONOPLAST INTRINSIC PROTEIN 4;3),Os05g0375400("(1),Os08g0137400(UCLACYANIN-LIKE PROTEIN 23)	Os01g0940800("beta-1),Os03g0128932,Os03g0197200,Os11g0508600(11N3),Os11g0637100,Os12g0476200(SWEET13)
MF	GO:0004568	chitinase activity	0	3	3	52	0.01599	0.351733	-	Os06g0726100(CHITINASE 3),Os10g0543400,Os11g0701600
BP	GO:1901071	glucosamine-containing compound metabolic process	0	3	3	56	0.016	0.351733	-	Os06g0726100(CHITINASE 3),Os10g0543400,Os11g0701600
BP	GO:0009074	aromatic amino acid family catabolic process	0	2	2	21	0.0166	0.358941	-	Os09g0110300(cyclase-like 4),Os11g0245100(ZETA GLUTATHIONE S-TRANSFERASE 4)
MF	GO:0016774	phosphotransferase activity, carboxyl group as acceptor	1	1	2	20	0.01741	0.359138	Os09g0294000	Os10g0442400
BP	GO:0006022	aminoglycan metabolic process	0	3	3	58	0.0175	0.359138	-	Os06g0726100(CHITINASE 3),Os10g0543400,Os11g0701600
BP	GO:0009623	response to parasitic fungus	1	0	1	2	0.0188	0.359138	Os04g0401000(PYRICULARIA ORYZAE RESISTANCE 21)	-
BP	GO:0034421	post-translational protein acetylation	0	1	1	2	0.0188	0.359138	-	Os04g0498900
BP	GO:0042183	formate catabolic process	0	1	1	2	0.0188	0.359138	-	Os06g0486900("FDH2)
BP	GO:0052863	1-deoxy-D-xylulose 5-phosphate metabolic process	1	0	1	2	0.0188	0.359138	Os05g0408900(1-DEOXY-D-XYLULOSE 5-PHOSPHATE SYNTHASE 1)	-
BP	GO:0052865	1-deoxy-D-xylulose 5-phosphate biosynthetic process	1	0	1	2	0.0188	0.359138	Os05g0408900(1-DEOXY-D-XYLULOSE 5-PHOSPHATE SYNTHASE 1)	-
BP	GO:0006812	cation transport	5	7	12	642	0.0191	0.359138	Os03g0667500(ZINC TRANSPORTER 10),Os03g0751100("Oligopeptide Transporter),Os03g0861400,Os04g0401000(PYRICULARIA ORYZAE RESISTANCE 21),Os10g0111700	Os03g0128932,Os03g0197200,Os04g0400000,Os05g0472400("zinc transporter 9),Os05g0472700(ZINC TRANSPORTER 5),Os08g0466200(HIGH-AFFINITY POTASSIUM(K+) TRANSPORTER 4),Os11g0637100
BP	GO:0016101	diterpenoid metabolic process	0	3	3	60	0.0192	0.359138	-	Os02g0570400(ENT-KAURENE SYNTHASE 7),Os06g0501900(P-450 76M9),Os12g0491800(KAURENE SYNTHASE-LIKE 10)
BP	GO:0006826	iron ion transport	2	0	2	23	0.0197	0.359138	Os03g0667500(ZINC TRANSPORTER 10),Os03g0751100("Oligopeptide Transporter)	-
MF	GO:0008843	endochitinase activity	0	1	1	2	0.02028	0.359138	-	Os06g0726100(CHITINASE 3)
MF	GO:0016231	beta-N-acetylglucosaminidase activity	0	1	1	2	0.02028	0.359138	-	Os06g0726100(CHITINASE 3)
MF	GO:0017096	acetylserotonin O-methyltransferase activity	0	1	1	2	0.02028	0.359138	-	Os09g0344500("O-methyltransferase ZRP4)
BP	GO:0016114	terpenoid biosynthetic process	1	3	4	111	0.0211	0.359138	Os05g0408900(1-DEOXY-D-XYLULOSE 5-PHOSPHATE SYNTHASE 1)	Os02g0570400(ENT-KAURENE SYNTHASE 7),Os06g0501900(P-450 76M9),Os12g0491800(KAURENE SYNTHASE-LIKE 10)
BP	GO:0042592	homeostatic process	8	3	11	582	0.0227	0.359138	Os02g0649900(YELLOW STRIP-LIKE GENE 2),Os03g0667500(ZINC TRANSPORTER 10),Os03g0751100("Oligopeptide Transporter),Os03g0861400,Os04g0401000(PYRICULARIA ORYZAE RESISTANCE 21),Os05g0269200,Os05g0587300,Os07g0255200	Os04g0400000,Os07g0519600,Os11g0124500
BP	GO:0035428	hexose transmembrane transport	0	3	3	64	0.0227	0.359138	-	Os03g0128932,Os03g0197200,Os11g0637100
BP	GO:1904659	glucose transmembrane transport	0	3	3	64	0.0227	0.359138	-	Os03g0128932,Os03g0197200,Os11g0637100
BP	GO:1905950	monosaccharide transmembrane transport	0	3	3	64	0.0227	0.359138	-	Os03g0128932,Os03g0197200,Os11g0637100
BP	GO:0006040	amino sugar metabolic process	0	3	3	66	0.0246	0.359138	-	Os06g0726100(CHITINASE 3),Os10g0543400,Os11g0701600
BP	GO:0019725	cellular homeostasis	6	2	8	370	0.0247	0.359138	Os02g0649900(YELLOW STRIP-LIKE GENE 2),Os03g0751100("Oligopeptide Transporter),Os03g0861400,Os04g0401000(PYRICULARIA ORYZAE RESISTANCE 21),Os05g0269200,Os05g0587300	Os04g0400000,Os11g0124500
CC	GO:0005887	integral component of plasma membrane	1	5	6	259	0.0253	0.359138	Os01g0232000(TONOPLAST INTRINSIC PROTEIN 4;3)	Os03g0128932,Os03g0197200,Os11g0508600(11N3),Os11g0637100,Os12g0476200(SWEET13)
BP	GO:0015758	glucose transport	0	3	3	67	0.0256	0.359138	-	Os03g0128932,Os03g0197200,Os11g0637100
CC	GO:0019008	molybdopterin synthase complex	1	0	1	3	0.0257	0.359138	Os02g0258900	-
BP	GO:0008037	cell recognition	3	1	4	118	0.0258	0.359138	Os01g0669100(Large spike S-domain receptor like Kinase 1),Os05g0166300,Os08g0179000	Os08g0230800(Lectin Receptor Kinase paralog)
BP	GO:0048544	recognition of pollen	3	1	4	118	0.0258	0.359138	Os01g0669100(Large spike S-domain receptor like Kinase 1),Os05g0166300,Os08g0179000	Os08g0230800(Lectin Receptor Kinase paralog)
BP	GO:0008645	hexose transport	0	3	3	68	0.0266	0.359138	-	Os03g0128932,Os03g0197200,Os11g0637100
MF	GO:0022891	substrate-specific transmembrane transporter activity	7	9	16	921	0.02666	0.359138	Os01g0232000(TONOPLAST INTRINSIC PROTEIN 4;3),Os03g0667500(ZINC TRANSPORTER 10),Os03g0751100("Oligopeptide Transporter),Os05g0269200,Os06g0188400(Glutamate receptor homolog 4.1),Os10g0111700,Os12g0194900("amino acid permease 10B)	Os03g0128932,Os03g0197200,Os05g0472400("zinc transporter 9),Os05g0472700(ZINC TRANSPORTER 5),Os07g0519600,Os08g0466200(HIGH-AFFINITY POTASSIUM(K+) TRANSPORTER 4),Os11g0508600(11N3),Os11g0637100,Os12g0476200(SWEET13)
BP	GO:0009765	photosynthesis, light harvesting	2	0	2	27	0.0267	0.359138	Os01g0600900(CHLOROPHYLL A/B BINDING PROTEIN 2R),Os04g0457000("light-harvesting protein CP24)	-
BP	GO:0016998	cell wall macromolecule catabolic process	0	2	2	27	0.0267	0.359138	-	Os06g0726100(CHITINASE 3),Os10g0543400
BP	GO:0015749	monosaccharide transport	0	3	3	69	0.0276	0.359138	-	Os03g0128932,Os03g0197200,Os11g0637100
MF	GO:0016614	oxidoreductase activity, acting on CH-OH group of donors	4	3	7	286	0.02766	0.359138	Os04g0483500("beta-ketoacyl-CoA reductase 1),Os06g0299100,Os09g0294000,Os10g0475100	Os02g0811800(CINNAMOYL-COA REDUCTASE 10),Os06g0486900("FDH2),Os09g0127300
BP	GO:0009875	pollen-pistil interaction	3	1	4	121	0.0279	0.359138	Os01g0669100(Large spike S-domain receptor like Kinase 1),Os05g0166300,Os08g0179000	Os08g0230800(Lectin Receptor Kinase paralog)
BP	GO:0009827	plant-type cell wall modification	1	0	1	3	0.0281	0.359138	Os09g0530200(glycoside hydrolase OsGH9B14)	-
BP	GO:0010047	fruit dehiscence	1	0	1	3	0.0281	0.359138	Os09g0530200(glycoside hydrolase OsGH9B14)	-
BP	GO:0015942	formate metabolic process	0	1	1	3	0.0281	0.359138	-	Os06g0486900("FDH2)
BP	GO:0019676	ammonia assimilation cycle	1	0	1	3	0.0281	0.359138	Os05g0555600(NADH-DEPENDENT GLUTAMATE SYNTHASE 2)	-
BP	GO:0030417	nicotianamine metabolic process	0	1	1	3	0.0281	0.359138	-	Os07g0689600(NICOTIANAMINE SYNTHASE 3)
BP	GO:0030418	nicotianamine biosynthetic process	0	1	1	3	0.0281	0.359138	-	Os07g0689600(NICOTIANAMINE SYNTHASE 3)
BP	GO:0043048	dolichyl monophosphate biosynthetic process	1	0	1	3	0.0281	0.359138	Os02g0142250	-
BP	GO:0072351	tricarboxylic acid biosynthetic process	0	1	1	3	0.0281	0.359138	-	Os07g0689600(NICOTIANAMINE SYNTHASE 3)
BP	GO:0097054	L-glutamate biosynthetic process	1	0	1	3	0.0281	0.359138	Os05g0555600(NADH-DEPENDENT GLUTAMATE SYNTHASE 2)	-
MF	GO:0016168	chlorophyll binding	2	0	2	26	0.02862	0.359138	Os01g0600900(CHLOROPHYLL A/B BINDING PROTEIN 2R),Os04g0457000("light-harvesting protein CP24)	-
MF	GO:0000287	magnesium ion binding	0	5	5	169	0.02968	0.359138	-	Os01g0791033,Os02g0570400(ENT-KAURENE SYNTHASE 7),Os03g0347900,Os03g0348200(terpene synthase 10),Os12g0491800(KAURENE SYNTHASE-LIKE 10)
MF	GO:0004168	dolichol kinase activity	1	0	1	3	0.03027	0.359138	Os02g0142250	-
MF	GO:0008661	1-deoxy-D-xylulose-5-phosphate synthase activity	1	0	1	3	0.03027	0.359138	Os05g0408900(1-DEOXY-D-XYLULOSE 5-PHOSPHATE SYNTHASE 1)	-
MF	GO:0008863	formate dehydrogenase (NAD+) activity	0	1	1	3	0.03027	0.359138	-	Os06g0486900("FDH2)
MF	GO:0015930	glutamate synthase activity	1	0	1	3	0.03027	0.359138	Os05g0555600(NADH-DEPENDENT GLUTAMATE SYNTHASE 2)	-
MF	GO:0016040	glutamate synthase (NADH) activity	1	0	1	3	0.03027	0.359138	Os05g0555600(NADH-DEPENDENT GLUTAMATE SYNTHASE 2)	-
MF	GO:0030410	nicotianamine synthase activity	0	1	1	3	0.03027	0.359138	-	Os07g0689600(NICOTIANAMINE SYNTHASE 3)
MF	GO:0045181	glutamate synthase activity, NAD(P)H as acceptor	1	0	1	3	0.03027	0.359138	Os05g0555600(NADH-DEPENDENT GLUTAMATE SYNTHASE 2)	-
BP	GO:0046916	cellular transition metal ion homeostasis	3	1	4	125	0.031	0.359138	Os02g0649900(YELLOW STRIP-LIKE GENE 2),Os03g0861400,Os04g0401000(PYRICULARIA ORYZAE RESISTANCE 21)	Os04g0400000
MF	GO:0005355	glucose transmembrane transporter activity	0	3	3	67	0.03104	0.359138	-	Os03g0128932,Os03g0197200,Os11g0637100
MF	GO:0015149	hexose transmembrane transporter activity	0	3	3	67	0.03104	0.359138	-	Os03g0128932,Os03g0197200,Os11g0637100
MF	GO:0015145	monosaccharide transmembrane transporter activity	0	3	3	68	0.03224	0.362725	-	Os03g0128932,Os03g0197200,Os11g0637100
BP	GO:0018298	protein-chromophore linkage	2	0	2	30	0.0325	0.362725	Os01g0600900(CHLOROPHYLL A/B BINDING PROTEIN 2R),Os04g0457000("light-harvesting protein CP24)	-
BP	GO:0006721	terpenoid metabolic process	1	3	4	129	0.0342	0.362725	Os05g0408900(1-DEOXY-D-XYLULOSE 5-PHOSPHATE SYNTHASE 1)	Os02g0570400(ENT-KAURENE SYNTHASE 7),Os06g0501900(P-450 76M9),Os12g0491800(KAURENE SYNTHASE-LIKE 10)
CC	GO:0009522	photosystem I	2	0	2	34	0.0348	0.362725	Os01g0600900(CHLOROPHYLL A/B BINDING PROTEIN 2R),Os04g0457000("light-harvesting protein CP24)	-
BP	GO:1901136	carbohydrate derivative catabolic process	0	3	3	77	0.0365	0.362725	-	Os06g0726100(CHITINASE 3),Os10g0543400,Os11g0701600
BP	GO:0006537	glutamate biosynthetic process	1	0	1	4	0.0373	0.362725	Os05g0555600(NADH-DEPENDENT GLUTAMATE SYNTHASE 2)	-
BP	GO:0009554	megasporogenesis	1	0	1	4	0.0373	0.362725	Os03g0100020(TETRASPANIN 4)	-
BP	GO:0009608	response to symbiont	1	0	1	4	0.0373	0.362725	Os04g0401000(PYRICULARIA ORYZAE RESISTANCE 21)	-
BP	GO:0009610	response to symbiotic fungus	1	0	1	4	0.0373	0.362725	Os04g0401000(PYRICULARIA ORYZAE RESISTANCE 21)	-
BP	GO:0010196	nonphotochemical quenching	1	0	1	4	0.0373	0.362725	Os04g0457000("light-harvesting protein CP24)	-
BP	GO:0010232	vascular transport	1	0	1	4	0.0373	0.362725	Os03g0751100("Oligopeptide Transporter)	-
BP	GO:0010233	phloem transport	1	0	1	4	0.0373	0.362725	Os03g0751100("Oligopeptide Transporter)	-
BP	GO:0010424	DNA methylation on cytosine within a CG sequence	1	0	1	4	0.0373	0.362725	Os03g0798300(METHYLTRANSFERASE 1A)	-
BP	GO:0030186	melatonin metabolic process	0	1	1	4	0.0373	0.362725	-	Os09g0344500("O-methyltransferase ZRP4)
BP	GO:0030187	melatonin biosynthetic process	0	1	1	4	0.0373	0.362725	-	Os09g0344500("O-methyltransferase ZRP4)
BP	GO:0031930	mitochondria-nucleus signaling pathway	1	0	1	4	0.0373	0.362725	Os01g0197450	-
BP	GO:0051194	positive regulation of cofactor metabolic process	1	0	1	4	0.0373	0.362725	Os01g0952800(basic helix-loop-helix protein 056)	-
BP	GO:0060359	response to ammonium ion	1	0	1	4	0.0373	0.362725	Os05g0555600(NADH-DEPENDENT GLUTAMATE SYNTHASE 2)	-
BP	GO:1900378	positive regulation of secondary metabolite biosynthetic process	1	0	1	4	0.0373	0.362725	Os01g0952800(basic helix-loop-helix protein 056)	-
BP	GO:1990066	energy quenching	1	0	1	4	0.0373	0.362725	Os04g0457000("light-harvesting protein CP24)	-
MF	GO:0080043	quercetin 3-O-glucosyltransferase activity	3	2	5	180	0.0374	0.362725	Os04g0272200,Os10g0178500,Os11g0471300	Os08g0404000,Os10g0442400
MF	GO:0080044	quercetin 7-O-glucosyltransferase activity	3	2	5	180	0.0374	0.362725	Os04g0272200,Os10g0178500,Os11g0471300	Os08g0404000,Os10g0442400
MF	GO:0000981	RNA polymerase II transcription factor activity, sequence-specific DNA binding	4	2	6	242	0.038	0.365318	Os02g0671300(basic helix-loop-helix protein 076),Os06g0108500,Os06g0667200(MADS BOX GENE 30),Os10g0567900	Os02g0564700(basic helix-loop-helix protein 097),Os03g0771100
CC	GO:0016020	membrane	51	42	93	9411	0.0384	0.365318	Os01g0122000("OsPR5),Os01g0197450,Os01g0232000(TONOPLAST INTRINSIC PROTEIN 4;3),Os01g0600900(CHLOROPHYLL A/B BINDING PROTEIN 2R),Os01g0669100(Large spike S-domain receptor like Kinase 1),Os01g0755700,Os01g0806000,Os01g0883000(RECEPTOR-LIKE CYTOPLASMIC KINASE 50),Os02g0142250,Os02g0156000(RECEPTOR-LIKE CYTOPLASMIC KINASE 62),Os02g0198000,Os02g0649900(YELLOW STRIP-LIKE GENE 2),Os03g0100020(TETRASPA…	Os01g0115600(RECEPTOR-LIKE CYTOPLASMIC KINASE 11),Os01g0144800,Os01g0162200,Os01g0902100(MULTIDRUG RESISTANCE-ASSOCIATED PROTEIN 2),Os01g0924200,Os01g0940800("beta-1),Os02g0247000,Os02g0621300("ECERIFERUM 1),Os03g0128932,Os03g0196400,Os03g0197200,Os04g0369000(RECEPTOR-LIKE CYTOPLASMIC KINASE 144),Os04g0369066(RECEPTOR-LIKE CYTOPLASMIC KINASE 144),Os04g0369100(RECEPTOR-LIKE CYTOPLASMIC KINASE 145)…
MF	GO:0020037	heme binding	2	9	11	588	0.03905	0.365318	Os02g0240300(class III peroxidase 29),Os12g0582700	Os03g0235000(PEROXIDASE N),Os04g0688500(class III peroxidase 62),Os05g0424300,Os06g0501900(P-450 76M9),Os07g0519600,Os09g0264400,Os09g0275400,Os10g0109600(PEROXIDASE A),Os11g0112200(class III peroxidase 131)
MF	GO:0005351	sugar:proton symporter activity	0	3	3	74	0.03991	0.365318	-	Os03g0128932,Os03g0197200,Os11g0637100
MF	GO:0005402	cation:sugar symporter activity	0	3	3	74	0.03991	0.365318	-	Os03g0128932,Os03g0197200,Os11g0637100
MF	GO:0004061	arylformamidase activity	0	1	1	4	0.04016	0.365318	-	Os09g0110300(cyclase-like 4)
MF	GO:0004412	homoserine dehydrogenase activity	1	0	1	4	0.04016	0.365318	Os09g0294000	-
MF	GO:0016034	maleylacetoacetate isomerase activity	0	1	1	4	0.04016	0.365318	-	Os11g0245100(ZETA GLUTATHIONE S-TRANSFERASE 4)
MF	GO:0046577	long-chain-alcohol oxidase activity	1	0	1	4	0.04016	0.365318	Os10g0475100	-
BP	GO:0006979	response to oxidative stress	3	4	7	336	0.0408	0.368597	Os01g0136100(16.9 KDA CLASS I HEAT SHOCK PROTEIN 1),Os01g0952800(basic helix-loop-helix protein 056),Os02g0240300(class III peroxidase 29)	Os03g0235000(PEROXIDASE N),Os04g0688500(class III peroxidase 62),Os10g0109600(PEROXIDASE A),Os11g0112200(class III peroxidase 131)
CC	GO:0016281	eukaryotic translation initiation factor 4F complex	1	0	1	5	0.0425	0.377788	Os02g0611500	-
MF	GO:0001871	pattern binding	1	5	6	250	0.04336	0.377788	Os05g0375400("(1)	Os01g0115600(RECEPTOR-LIKE CYTOPLASMIC KINASE 11),Os01g0137700,Os01g0940800("beta-1),Os06g0726100(CHITINASE 3),Os10g0543400
MF	GO:0030247	polysaccharide binding	1	5	6	250	0.04336	0.377788	Os05g0375400("(1)	Os01g0115600(RECEPTOR-LIKE CYTOPLASMIC KINASE 11),Os01g0137700,Os01g0940800("beta-1),Os06g0726100(CHITINASE 3),Os10g0543400
MF	GO:0004553	hydrolase activity, hydrolyzing O-glycosyl compounds	3	6	9	455	0.04411	0.377788	Os05g0375400("(1),Os07g0575500,Os09g0530200(glycoside hydrolase OsGH9B14)	Os01g0940800("beta-1),Os04g0474800(BETA-GLUCOSIDASE 12),Os04g0640700,Os06g0726100(CHITINASE 3),Os10g0543400,Os11g0701600
MF	GO:0004601	peroxidase activity	1	4	5	190	0.04539	0.377788	Os02g0240300(class III peroxidase 29)	Os03g0235000(PEROXIDASE N),Os04g0688500(class III peroxidase 62),Os10g0109600(PEROXIDASE A),Os11g0112200(class III peroxidase 131)
MF	GO:0016709	oxidoreductase activity, acting on paired donors, with incorporation or reduction of molecular oxygen, NAD(P)H as one donor, and incorporation of one atom of oxygen	2	4	6	253	0.04548	0.377788	Os04g0223500,Os12g0582700	Os05g0424300,Os06g0501900(P-450 76M9),Os09g0264400,Os09g0275400
MF	GO:0016684	oxidoreductase activity, acting on peroxide as acceptor	1	4	5	191	0.04624	0.377788	Os02g0240300(class III peroxidase 29)	Os03g0235000(PEROXIDASE N),Os04g0688500(class III peroxidase 62),Os10g0109600(PEROXIDASE A),Os11g0112200(class III peroxidase 131)
BP	GO:0009237	siderophore metabolic process	1	0	1	5	0.0464	0.377788	Os01g0952800(basic helix-loop-helix protein 056)	-
BP	GO:0015688	iron chelate transport	1	0	1	5	0.0464	0.377788	Os02g0649900(YELLOW STRIP-LIKE GENE 2)	-
BP	GO:0019290	siderophore biosynthetic process	1	0	1	5	0.0464	0.377788	Os01g0952800(basic helix-loop-helix protein 056)	-
BP	GO:0019441	tryptophan catabolic process to kynurenine	0	1	1	5	0.0464	0.377788	-	Os09g0110300(cyclase-like 4)
BP	GO:0033212	iron assimilation	1	0	1	5	0.0464	0.377788	Os02g0649900(YELLOW STRIP-LIKE GENE 2)	-
BP	GO:0033214	iron assimilation by chelation and transport	1	0	1	5	0.0464	0.377788	Os02g0649900(YELLOW STRIP-LIKE GENE 2)	-
BP	GO:0051091	positive regulation of DNA binding transcription factor activity	0	1	1	5	0.0464	0.377788	-	Os05g0390800(VQ motif-containing protein 19)
BP	GO:0097503	sialylation	0	1	1	5	0.0464	0.377788	-	Os04g0506800(STLP3)
BP	GO:0106004	tRNA (guanine-N7)-methylation	0	1	1	5	0.0464	0.377788	-	Os10g0442400
MF	GO:0008146	sulfotransferase activity	1	1	2	34	0.04686	0.379192	Os08g0240000	Os04g0526300
MF	GO:0008176	tRNA (guanine-N7-)-methyltransferase activity	0	1	1	5	0.04994	0.387941	-	Os10g0442400
MF	GO:0008373	sialyltransferase activity	0	1	1	5	0.04994	0.387941	-	Os04g0506800(STLP3)
MF	GO:0015292	uniporter activity	0	1	1	5	0.04994	0.387941	-	Os11g0124500
MF	GO:0015603	iron chelate transmembrane transporter activity	1	0	1	5	0.04994	0.387941	Os02g0649900(YELLOW STRIP-LIKE GENE 2)	-
MF	GO:0051980	iron-nicotianamine transmembrane transporter activity	1	0	1	5	0.04994	0.387941	Os02g0649900(YELLOW STRIP-LIKE GENE 2)	-
MF	GO:0102148	N-acetyl-beta-D-galactosaminidase activity	1	0	1	5	0.04994	0.387941	Os07g0575500	-
BP	GO:0042744	hydrogen peroxide catabolic process	1	3	4	146	0.05	0.387941	Os02g0240300(class III peroxidase 29)	Os04g0688500(class III peroxidase 62),Os10g0109600(PEROXIDASE A),Os11g0112200(class III peroxidase 131)
MF	GO:1990837	sequence-specific double-stranded DNA binding	4	2	6	260	0.0507	0.391072	Os01g0952800(basic helix-loop-helix protein 056),Os02g0671300(basic helix-loop-helix protein 076),Os06g0108500,Os06g0667200(MADS BOX GENE 30)	Os02g0564700(basic helix-loop-helix protein 097),Os02g0713700
MF	GO:0035251	UDP-glucosyltransferase activity	3	3	6	261	0.05147	0.39448	Os04g0272200,Os10g0178500,Os11g0471300	Os02g0247000,Os08g0404000,Os10g0442400
MF	GO:0022857	transmembrane transporter activity	9	11	20	1328	0.05174	0.39448	Os01g0232000(TONOPLAST INTRINSIC PROTEIN 4;3),Os02g0649900(YELLOW STRIP-LIKE GENE 2),Os03g0667500(ZINC TRANSPORTER 10),Os03g0751100("Oligopeptide Transporter),Os05g0269200,Os06g0188400(Glutamate receptor homolog 4.1),Os06g0561800(MULTIDRUG RESISTANCE-ASSOCIATED PROTEIN 11),Os10g0111700,Os12g0194900("amino acid permease 10B)	Os01g0902100(MULTIDRUG RESISTANCE-ASSOCIATED PROTEIN 2),Os03g0128932,Os03g0197200,Os05g0472400("zinc transporter 9),Os05g0472700(ZINC TRANSPORTER 5),Os07g0519600,Os08g0466200(HIGH-AFFINITY POTASSIUM(K+) TRANSPORTER 4),Os11g0124500,Os11g0508600(11N3),Os11g0637100,Os12g0476200(SWEET13)
MF	GO:0015075	ion transmembrane transporter activity	6	7	13	770	0.0522	0.3957	Os03g0667500(ZINC TRANSPORTER 10),Os03g0751100("Oligopeptide Transporter),Os05g0269200,Os06g0188400(Glutamate receptor homolog 4.1),Os10g0111700,Os12g0194900("amino acid permease 10B)	Os03g0128932,Os03g0197200,Os05g0472400("zinc transporter 9),Os05g0472700(ZINC TRANSPORTER 5),Os07g0519600,Os08g0466200(HIGH-AFFINITY POTASSIUM(K+) TRANSPORTER 4),Os11g0637100
BP	GO:0070838	divalent metal ion transport	1	2	3	90	0.0537	0.399304	Os03g0667500(ZINC TRANSPORTER 10)	Os05g0472400("zinc transporter 9),Os05g0472700(ZINC TRANSPORTER 5)
BP	GO:0072511	divalent inorganic cation transport	1	2	3	90	0.0537	0.399304	Os03g0667500(ZINC TRANSPORTER 10)	Os05g0472400("zinc transporter 9),Os05g0472700(ZINC TRANSPORTER 5)
CC	GO:0005576	extracellular region	3	8	11	736	0.0551	0.399304	Os01g0613500,Os02g0240300(class III peroxidase 29),Os09g0530200(glycoside hydrolase OsGH9B14)	Os04g0688500(class III peroxidase 62),Os09g0110300(cyclase-like 4),Os09g0538000(RIBONUCLEASE 5),Os10g0109600(PEROXIDASE A),Os11g0112200(class III peroxidase 131),Os11g0214400,Os11g0214900,Os11g0701600
BP	GO:0006569	tryptophan catabolic process	0	1	1	6	0.0554	0.399304	-	Os09g0110300(cyclase-like 4)
BP	GO:0009934	regulation of meristem structural organization	1	0	1	6	0.0554	0.399304	Os03g0100020(TETRASPANIN 4)	-
BP	GO:0009956	radial pattern formation	1	0	1	6	0.0554	0.399304	Os03g0100020(TETRASPANIN 4)	-
BP	GO:0042436	indole-containing compound catabolic process	0	1	1	6	0.0554	0.399304	-	Os09g0110300(cyclase-like 4)
BP	GO:0046218	indolalkylamine catabolic process	0	1	1	6	0.0554	0.399304	-	Os09g0110300(cyclase-like 4)
BP	GO:0051560	mitochondrial calcium ion homeostasis	0	1	1	6	0.0554	0.399304	-	Os11g0124500
BP	GO:0008299	isoprenoid biosynthetic process	1	3	4	152	0.0563	0.401404	Os05g0408900(1-DEOXY-D-XYLULOSE 5-PHOSPHATE SYNTHASE 1)	Os02g0570400(ENT-KAURENE SYNTHASE 7),Os06g0501900(P-450 76M9),Os12g0491800(KAURENE SYNTHASE-LIKE 10)
BP	GO:0042743	hydrogen peroxide metabolic process	1	3	4	152	0.0563	0.401404	Os02g0240300(class III peroxidase 29)	Os04g0688500(class III peroxidase 62),Os10g0109600(PEROXIDASE A),Os11g0112200(class III peroxidase 131)
MF	GO:0046873	metal ion transmembrane transporter activity	2	3	5	203	0.0572	0.405628	Os03g0667500(ZINC TRANSPORTER 10),Os03g0751100("Oligopeptide Transporter)	Os05g0472400("zinc transporter 9),Os05g0472700(ZINC TRANSPORTER 5),Os08g0466200(HIGH-AFFINITY POTASSIUM(K+) TRANSPORTER 4)
MF	GO:0004618	phosphoglycerate kinase activity	0	1	1	6	0.05963	0.416148	-	Os10g0442400
MF	GO:0016621	cinnamoyl-CoA reductase activity	0	1	1	6	0.05963	0.416148	-	Os02g0811800(CINNAMOYL-COA REDUCTASE 10)
MF	GO:0051538	3 iron, 4 sulfur cluster binding	1	0	1	6	0.05963	0.416148	Os05g0555600(NADH-DEPENDENT GLUTAMATE SYNTHASE 2)	-
CC	GO:0010287	plastoglobule	2	0	2	46	0.0601	0.417221	Os01g0600900(CHLOROPHYLL A/B BINDING PROTEIN 2R),Os04g0457000("light-harvesting protein CP24)	-
BP	GO:0051090	regulation of DNA binding transcription factor activity	0	1	1	7	0.0643	0.435608	-	Os05g0390800(VQ motif-containing protein 19)
BP	GO:0071731	response to nitric oxide	1	0	1	7	0.0643	0.435608	Os01g0952800(basic helix-loop-helix protein 056)	-
BP	GO:1900376	regulation of secondary metabolite biosynthetic process	1	0	1	7	0.0643	0.435608	Os01g0952800(basic helix-loop-helix protein 056)	-
BP	GO:1990641	response to iron ion starvation	1	0	1	7	0.0643	0.435608	Os01g0952800(basic helix-loop-helix protein 056)	-
MF	GO:0072509	divalent inorganic cation transmembrane transporter activity	1	2	3	90	0.0644	0.435608	Os03g0667500(ZINC TRANSPORTER 10)	Os05g0472400("zinc transporter 9),Os05g0472700(ZINC TRANSPORTER 5)
MF	GO:0004497	monooxygenase activity	3	5	8	420	0.06654	0.447787	Os02g0734400,Os04g0223500,Os12g0582700	Os05g0424300,Os06g0501900(P-450 76M9),Os07g0519600,Os09g0264400,Os09g0275400
CC	GO:0044611	nuclear pore inner ring	1	0	1	8	0.0672	0.449933	Os12g0236100	-
MF	GO:0015295	solute:proton symporter activity	1	3	4	151	0.06894	0.455428	Os10g0111700	Os03g0128932,Os03g0197200,Os11g0637100
MF	GO:0022892	substrate-specific transporter activity	7	9	16	1047	0.06958	0.455428	Os01g0232000(TONOPLAST INTRINSIC PROTEIN 4;3),Os03g0667500(ZINC TRANSPORTER 10),Os03g0751100("Oligopeptide Transporter),Os05g0269200,Os06g0188400(Glutamate receptor homolog 4.1),Os10g0111700,Os12g0194900("amino acid permease 10B)	Os03g0128932,Os03g0197200,Os05g0472400("zinc transporter 9),Os05g0472700(ZINC TRANSPORTER 5),Os07g0519600,Os08g0466200(HIGH-AFFINITY POTASSIUM(K+) TRANSPORTER 4),Os11g0508600(11N3),Os11g0637100,Os12g0476200(SWEET13)
CC	GO:0000325	plant-type vacuole	2	1	3	110	0.0703	0.455428	Os01g0232000(TONOPLAST INTRINSIC PROTEIN 4;3),Os06g0561800(MULTIDRUG RESISTANCE-ASSOCIATED PROTEIN 11)	Os01g0902100(MULTIDRUG RESISTANCE-ASSOCIATED PROTEIN 2)
MF	GO:0001046	core promoter sequence-specific DNA binding	1	1	2	43	0.07112	0.455428	Os02g0671300(basic helix-loop-helix protein 076)	Os02g0564700(basic helix-loop-helix protein 097)
MF	GO:0001047	core promoter binding	1	1	2	43	0.07112	0.455428	Os02g0671300(basic helix-loop-helix protein 076)	Os02g0564700(basic helix-loop-helix protein 097)
BP	GO:0009856	pollination	3	1	4	165	0.0716	0.455428	Os01g0669100(Large spike S-domain receptor like Kinase 1),Os05g0166300,Os08g0179000	Os08g0230800(Lectin Receptor Kinase paralog)
BP	GO:0044706	multi-multicellular organism process	3	1	4	165	0.0716	0.455428	Os01g0669100(Large spike S-domain receptor like Kinase 1),Os05g0166300,Os08g0179000	Os08g0230800(Lectin Receptor Kinase paralog)
MF	GO:0000976	transcription regulatory region sequence-specific DNA binding	4	1	5	217	0.07171	0.455428	Os01g0952800(basic helix-loop-helix protein 056),Os02g0671300(basic helix-loop-helix protein 076),Os06g0108500,Os06g0667200(MADS BOX GENE 30)	Os02g0564700(basic helix-loop-helix protein 097)
BP	GO:0009090	homoserine biosynthetic process	1	0	1	8	0.0732	0.455428	Os09g0294000	-
BP	GO:0009228	thiamine biosynthetic process	1	0	1	8	0.0732	0.455428	Os05g0408900(1-DEOXY-D-XYLULOSE 5-PHOSPHATE SYNTHASE 1)	-
BP	GO:0032776	DNA methylation on cytosine	1	0	1	8	0.0732	0.455428	Os03g0798300(METHYLTRANSFERASE 1A)	-
BP	GO:0042724	thiamine-containing compound biosynthetic process	1	0	1	8	0.0732	0.455428	Os05g0408900(1-DEOXY-D-XYLULOSE 5-PHOSPHATE SYNTHASE 1)	-
BP	GO:0046685	response to arsenic-containing substance	1	0	1	8	0.0732	0.455428	Os01g0952800(basic helix-loop-helix protein 056)	-
BP	GO:0070189	kynurenine metabolic process	0	1	1	8	0.0732	0.455428	-	Os09g0110300(cyclase-like 4)
BP	GO:0090116	C-5 methylation of cytosine	1	0	1	8	0.0732	0.455428	Os03g0798300(METHYLTRANSFERASE 1A)	-
CC	GO:0005786	signal recognition particle, endoplasmic reticulum targeting	0	1	1	9	0.0752	0.46257	-	Os05g0509500
BP	GO:0000272	polysaccharide catabolic process	2	2	4	168	0.0754	0.46257	Os07g0607400(PECTIN METHYLESTERASE 20),Os09g0530200(glycoside hydrolase OsGH9B14)	Os04g0640700,Os06g0726100(CHITINASE 3)
BP	GO:0098662	inorganic cation transmembrane transport	2	6	8	466	0.0754	0.46257	Os03g0667500(ZINC TRANSPORTER 10),Os10g0111700	Os03g0128932,Os03g0197200,Os05g0472400("zinc transporter 9),Os05g0472700(ZINC TRANSPORTER 5),Os08g0466200(HIGH-AFFINITY POTASSIUM(K+) TRANSPORTER 4),Os11g0637100
MF	GO:0003886	DNA (cytosine-5-)-methyltransferase activity	1	0	1	8	0.07871	0.473041	Os03g0798300(METHYLTRANSFERASE 1A)	-
MF	GO:0004072	aspartate kinase activity	1	0	1	8	0.07871	0.473041	Os09g0294000	-
MF	GO:0016639	oxidoreductase activity, acting on the CH-NH2 group of donors, NAD or NADP as acceptor	1	0	1	8	0.07871	0.473041	Os05g0555600(NADH-DEPENDENT GLUTAMATE SYNTHASE 2)	-
MF	GO:0033897	ribonuclease T2 activity	0	1	1	8	0.07871	0.473041	-	Os09g0538000(RIBONUCLEASE 5)
BP	GO:0055085	transmembrane transport	8	11	19	1421	0.0789	0.473041	Os01g0232000(TONOPLAST INTRINSIC PROTEIN 4;3),Os02g0649900(YELLOW STRIP-LIKE GENE 2),Os03g0667500(ZINC TRANSPORTER 10),Os03g0751100("Oligopeptide Transporter),Os05g0269200,Os06g0561800(MULTIDRUG RESISTANCE-ASSOCIATED PROTEIN 11),Os10g0111700,Os12g0194900("amino acid permease 10B)	Os01g0902100(MULTIDRUG RESISTANCE-ASSOCIATED PROTEIN 2),Os03g0128932,Os03g0197200,Os05g0472400("zinc transporter 9),Os05g0472700(ZINC TRANSPORTER 5),Os08g0409900,Os08g0466200(HIGH-AFFINITY POTASSIUM(K+) TRANSPORTER 4),Os11g0124500,Os11g0508600(11N3),Os11g0637100,Os12g0476200(SWEET13)
MF	GO:0015294	solute:cation symporter activity	1	3	4	160	0.08135	0.474377	Os10g0111700	Os03g0128932,Os03g0197200,Os11g0637100
BP	GO:0006777	Mo-molybdopterin cofactor biosynthetic process	1	0	1	9	0.082	0.474377	Os02g0258900	-
BP	GO:0009900	dehiscence	1	0	1	9	0.082	0.474377	Os09g0530200(glycoside hydrolase OsGH9B14)	-
BP	GO:0010216	maintenance of DNA methylation	1	0	1	9	0.082	0.474377	Os03g0798300(METHYLTRANSFERASE 1A)	-
BP	GO:0015798	myo-inositol transport	0	1	1	9	0.082	0.474377	-	Os03g0128932
BP	GO:0019720	Mo-molybdopterin cofactor metabolic process	1	0	1	9	0.082	0.474377	Os02g0258900	-
BP	GO:0043545	molybdopterin cofactor metabolic process	1	0	1	9	0.082	0.474377	Os02g0258900	-
BP	GO:0051189	prosthetic group metabolic process	1	0	1	9	0.082	0.474377	Os02g0258900	-
CC	GO:0042807	central vacuole	1	0	1	10	0.0832	0.479217	Os01g0232000(TONOPLAST INTRINSIC PROTEIN 4;3)	-
MF	GO:0046527	glucosyltransferase activity	3	3	6	297	0.08412	0.48241	Os04g0272200,Os10g0178500,Os11g0471300	Os02g0247000,Os08g0404000,Os10g0442400
BP	GO:0098754	detoxification	1	5	6	321	0.0847	0.483633	Os02g0240300(class III peroxidase 29)	Os01g0558100(TAU GLUTATHIONE S-TRANSFERASE 6),Os03g0235000(PEROXIDASE N),Os04g0688500(class III peroxidase 62),Os10g0109600(PEROXIDASE A),Os11g0112200(class III peroxidase 131)
MF	GO:0005365	myo-inositol transmembrane transporter activity	0	1	1	9	0.08811	0.491775	-	Os03g0128932
MF	GO:0005366	myo-inositol:proton symporter activity	0	1	1	9	0.08811	0.491775	-	Os03g0128932
MF	GO:0008312	7S RNA binding	0	1	1	9	0.08811	0.491775	-	Os05g0509500
MF	GO:0009008	DNA-methyltransferase activity	1	0	1	9	0.08811	0.491775	Os03g0798300(METHYLTRANSFERASE 1A)	-
MF	GO:0008061	chitin binding	0	2	2	49	0.08907	0.491775	-	Os06g0726100(CHITINASE 3),Os11g0701600
BP	GO:0006720	isoprenoid metabolic process	1	3	4	179	0.0901	0.491775	Os05g0408900(1-DEOXY-D-XYLULOSE 5-PHOSPHATE SYNTHASE 1)	Os02g0570400(ENT-KAURENE SYNTHASE 7),Os06g0501900(P-450 76M9),Os12g0491800(KAURENE SYNTHASE-LIKE 10)
BP	GO:0015791	polyol transport	0	1	1	10	0.0906	0.491775	-	Os03g0128932
BP	GO:0031221	arabinan metabolic process	0	1	1	10	0.0906	0.491775	-	Os04g0640700
BP	GO:0031222	arabinan catabolic process	0	1	1	10	0.0906	0.491775	-	Os04g0640700
BP	GO:0036265	RNA (guanine-N7)-methylation	0	1	1	10	0.0906	0.491775	-	Os10g0442400
BP	GO:1900150	regulation of defense response to fungus	1	0	1	10	0.0906	0.491775	Os04g0401000(PYRICULARIA ORYZAE RESISTANCE 21)	-
BP	GO:1901678	iron coordination entity transport	1	0	1	10	0.0906	0.491775	Os02g0649900(YELLOW STRIP-LIKE GENE 2)	-
CC	GO:0048500	signal recognition particle	0	1	1	11	0.0912	0.493003	-	Os05g0509500
BP	GO:0009636	response to toxic substance	1	5	6	329	0.0926	0.49736	Os02g0240300(class III peroxidase 29)	Os01g0558100(TAU GLUTATHIONE S-TRANSFERASE 6),Os03g0235000(PEROXIDASE N),Os04g0688500(class III peroxidase 62),Os10g0109600(PEROXIDASE A),Os11g0112200(class III peroxidase 131)
MF	GO:0008324	cation transmembrane transporter activity	3	6	9	529	0.09276	0.49736	Os03g0667500(ZINC TRANSPORTER 10),Os03g0751100("Oligopeptide Transporter),Os10g0111700	Os03g0128932,Os03g0197200,Os05g0472400("zinc transporter 9),Os05g0472700(ZINC TRANSPORTER 5),Os08g0466200(HIGH-AFFINITY POTASSIUM(K+) TRANSPORTER 4),Os11g0637100
MF	GO:0016798	hydrolase activity, acting on glycosyl bonds	3	6	9	531	0.0944	0.499408	Os05g0375400("(1),Os07g0575500,Os09g0530200(glycoside hydrolase OsGH9B14)	Os01g0940800("beta-1),Os04g0474800(BETA-GLUCOSIDASE 12),Os04g0640700,Os06g0726100(CHITINASE 3),Os10g0543400,Os11g0701600
MF	GO:0016835	carbon-oxygen lyase activity	0	4	4	170	0.09632	0.499408	-	Os02g0570400(ENT-KAURENE SYNTHASE 7),Os03g0347900,Os03g0348200(terpene synthase 10),Os12g0491800(KAURENE SYNTHASE-LIKE 10)
MF	GO:0050662	coenzyme binding	4	3	7	382	0.0968	0.499408	Os04g0223500,Os05g0555600(NADH-DEPENDENT GLUTAMATE SYNTHASE 2),Os09g0294000,Os10g0475100	Os02g0811800(CINNAMOYL-COA REDUCTASE 10),Os06g0486900("FDH2),Os09g0127300
MF	GO:0000170	sphingosine hydroxylase activity	0	1	1	10	0.09741	0.499408	-	Os02g0621300("ECERIFERUM 1)
MF	GO:0008515	sucrose transmembrane transporter activity	0	1	1	10	0.09741	0.499408	-	Os11g0508600(11N3)
MF	GO:0009044	xylan 1,4-beta-xylosidase activity	0	1	1	10	0.09741	0.499408	-	Os04g0640700
MF	GO:0009924	octadecanal decarbonylase activity	0	1	1	10	0.09741	0.499408	-	Os02g0621300("ECERIFERUM 1)
MF	GO:0015166	polyol transmembrane transporter activity	0	1	1	10	0.09741	0.499408	-	Os03g0128932
MF	GO:0071771	aldehyde decarbonylase activity	0	1	1	10	0.09741	0.499408	-	Os02g0621300("ECERIFERUM 1)
MF	GO:0097599	xylanase activity	0	1	1	10	0.09741	0.499408	-	Os04g0640700
MF	GO:1990465	aldehyde oxygenase (deformylating) activity	0	1	1	10	0.09741	0.499408	-	Os02g0621300("ECERIFERUM 1)
BP	GO:0042545	cell wall modification	2	0	2	56	0.0983	0.499408	Os07g0607400(PECTIN METHYLESTERASE 20),Os09g0530200(glycoside hydrolase OsGH9B14)	-
BP	GO:0010104	regulation of ethylene-activated signaling pathway	1	0	1	11	0.0992	0.499408	Os01g0952800(basic helix-loop-helix protein 056)	-
BP	GO:0019740	nitrogen utilization	1	0	1	11	0.0992	0.499408	Os05g0555600(NADH-DEPENDENT GLUTAMATE SYNTHASE 2)	-
BP	GO:0051193	regulation of cofactor metabolic process	1	0	1	11	0.0992	0.499408	Os01g0952800(basic helix-loop-helix protein 056)	-
BP	GO:0070297	regulation of phosphorelay signal transduction system	1	0	1	11	0.0992	0.499408	Os01g0952800(basic helix-loop-helix protein 056)	-
BP	GO:0006576	cellular biogenic amine metabolic process	0	2	2	57	0.1013	0.506038	-	Os07g0689600(NICOTIANAMINE SYNTHASE 3),Os09g0110300(cyclase-like 4)
BP	GO:1901698	response to nitrogen compound	2	2	4	188	0.1031	0.506038	Os01g0952800(basic helix-loop-helix protein 056),Os05g0555600(NADH-DEPENDENT GLUTAMATE SYNTHASE 2)	Os07g0519600,Os08g0148600
BP	GO:0051704	multi-organism process	6	3	9	585	0.1037	0.506038	Os01g0669100(Large spike S-domain receptor like Kinase 1),Os02g0156000(RECEPTOR-LIKE CYTOPLASMIC KINASE 62),Os03g0100020(TETRASPANIN 4),Os04g0401000(PYRICULARIA ORYZAE RESISTANCE 21),Os05g0166300,Os08g0179000	Os06g0726100(CHITINASE 3),Os07g0131375,Os08g0230800(Lectin Receptor Kinase paralog)
MF	GO:0016782	transferase activity, transferring sulfur-containing groups	1	1	2	54	0.10493	0.506038	Os08g0240000	Os04g0526300
BP	GO:0098655	cation transmembrane transport	2	6	8	504	0.106	0.506038	Os03g0667500(ZINC TRANSPORTER 10),Os10g0111700	Os03g0128932,Os03g0197200,Os05g0472400("zinc transporter 9),Os05g0472700(ZINC TRANSPORTER 5),Os08g0466200(HIGH-AFFINITY POTASSIUM(K+) TRANSPORTER 4),Os11g0637100
BP	GO:0072593	reactive oxygen species metabolic process	1	3	4	190	0.1062	0.506038	Os02g0240300(class III peroxidase 29)	Os04g0688500(class III peroxidase 62),Os10g0109600(PEROXIDASE A),Os11g0112200(class III peroxidase 131)
MF	GO:0015154	disaccharide transmembrane transporter activity	0	1	1	11	0.10661	0.506038	-	Os11g0508600(11N3)
MF	GO:0015157	oligosaccharide transmembrane transporter activity	0	1	1	11	0.10661	0.506038	-	Os11g0508600(11N3)
MF	GO:0016892	endoribonuclease activity, producing 3'-phosphomonoesters	0	1	1	11	0.10661	0.506038	-	Os09g0538000(RIBONUCLEASE 5)
MF	GO:0019202	amino acid kinase activity	1	0	1	11	0.10661	0.506038	Os09g0294000	-
CC	GO:0016442	RISC complex	0	1	1	13	0.1068	0.506038	-	Os08g0148600
CC	GO:0031332	RNAi effector complex	0	1	1	13	0.1068	0.506038	-	Os08g0148600
BP	GO:0044106	cellular amine metabolic process	0	2	2	59	0.1073	0.506038	-	Os07g0689600(NICOTIANAMINE SYNTHASE 3),Os09g0110300(cyclase-like 4)
BP	GO:0006772	thiamine metabolic process	1	0	1	12	0.1078	0.506038	Os05g0408900(1-DEOXY-D-XYLULOSE 5-PHOSPHATE SYNTHASE 1)	-
BP	GO:0009092	homoserine metabolic process	1	0	1	12	0.1078	0.506038	Os09g0294000	-
BP	GO:0015770	sucrose transport	0	1	1	12	0.1078	0.506038	-	Os11g0508600(11N3)
BP	GO:0042343	indole glucosinolate metabolic process	1	0	1	12	0.1078	0.506038	Os12g0582700	-
BP	GO:0042723	thiamine-containing compound metabolic process	1	0	1	12	0.1078	0.506038	Os05g0408900(1-DEOXY-D-XYLULOSE 5-PHOSPHATE SYNTHASE 1)	-
MF	GO:0008194	UDP-glycosyltransferase activity	4	3	7	393	0.10811	0.506038	Os04g0272200,Os10g0178500,Os10g0516600(OsSTA247),Os11g0471300	Os02g0247000,Os08g0404000,Os10g0442400
MF	GO:0016620	oxidoreductase activity, acting on the aldehyde or oxo group of donors, NAD or NADP as acceptor	0	2	2	55	0.10819	0.506038	-	Os02g0811800(CINNAMOYL-COA REDUCTASE 10),Os06g0486900("FDH2)
BP	GO:0098660	inorganic ion transmembrane transport	2	6	8	509	0.1105	0.514321	Os03g0667500(ZINC TRANSPORTER 10),Os10g0111700	Os03g0128932,Os03g0197200,Os05g0472400("zinc transporter 9),Os05g0472700(ZINC TRANSPORTER 5),Os08g0466200(HIGH-AFFINITY POTASSIUM(K+) TRANSPORTER 4),Os11g0637100
BP	GO:0098869	cellular oxidant detoxification	1	4	5	268	0.1109	0.514321	Os02g0240300(class III peroxidase 29)	Os03g0235000(PEROXIDASE N),Os04g0688500(class III peroxidase 62),Os10g0109600(PEROXIDASE A),Os11g0112200(class III peroxidase 131)
MF	GO:0003700	DNA binding transcription factor activity	8	6	14	957	0.11171	0.514321	Os01g0952800(basic helix-loop-helix protein 056),Os02g0671300(basic helix-loop-helix protein 076),Os06g0108500,Os06g0667200(MADS BOX GENE 30),Os08g0246800,Os08g0499300(WRKY GENE 30),Os08g0508700(ETHYLENE INSENSITIVE-LIKE GENE 4),Os10g0567900	Os01g0186000(WRKY GENE 10),Os01g0676900,Os02g0564700(basic helix-loop-helix protein 097),Os02g0713700,Os03g0771100,Os05g0549800(APETALA2/ETHYLENE-RESPONSIVE ELEMENT BINDING PROTEIN 96)
CC	GO:0005771	multivesicular body	0	1	1	14	0.1146	0.514321	-	Os06g0708400(CYCLOPHILIN 19-4)
MF	GO:0015665	alcohol transmembrane transporter activity	0	1	1	12	0.11572	0.514321	-	Os03g0128932
MF	GO:1901618	organic hydroxy compound transmembrane transporter activity	0	1	1	12	0.11572	0.514321	-	Os03g0128932
BP	GO:0006999	nuclear pore organization	1	0	1	13	0.1162	0.514321	Os12g0236100	-
BP	GO:0009310	amine catabolic process	0	1	1	13	0.1162	0.514321	-	Os09g0110300(cyclase-like 4)
BP	GO:0015766	disaccharide transport	0	1	1	13	0.1162	0.514321	-	Os11g0508600(11N3)
BP	GO:0015772	oligosaccharide transport	0	1	1	13	0.1162	0.514321	-	Os11g0508600(11N3)
BP	GO:0018196	peptidyl-asparagine modification	0	1	1	13	0.1162	0.514321	-	Os04g0506800(STLP3)
BP	GO:0018279	protein N-linked glycosylation via asparagine	0	1	1	13	0.1162	0.514321	-	Os04g0506800(STLP3)
BP	GO:0034293	sexual sporulation	1	0	1	13	0.1162	0.514321	Os03g0100020(TETRASPANIN 4)	-
BP	GO:0042402	cellular biogenic amine catabolic process	0	1	1	13	0.1162	0.514321	-	Os09g0110300(cyclase-like 4)
BP	GO:0043934	sporulation	1	0	1	13	0.1162	0.514321	Os03g0100020(TETRASPANIN 4)	-
BP	GO:0048236	plant-type sporogenesis	1	0	1	13	0.1162	0.514321	Os03g0100020(TETRASPANIN 4)	-
MF	GO:0005506	iron ion binding	2	6	8	479	0.1177	0.519218	Os05g0555600(NADH-DEPENDENT GLUTAMATE SYNTHASE 2),Os12g0582700	Os02g0621300("ECERIFERUM 1),Os05g0424300,Os06g0501900(P-450 76M9),Os07g0519600,Os09g0264400,Os09g0275400
BP	GO:0016054	organic acid catabolic process	0	3	3	127	0.1192	0.520961	-	Os06g0486900("FDH2),Os09g0110300(cyclase-like 4),Os11g0245100(ZETA GLUTATHIONE S-TRANSFERASE 4)
BP	GO:0046395	carboxylic acid catabolic process	0	3	3	127	0.1192	0.520961	-	Os06g0486900("FDH2),Os09g0110300(cyclase-like 4),Os11g0245100(ZETA GLUTATHIONE S-TRANSFERASE 4)
MF	GO:0015293	symporter activity	1	3	4	184	0.11928	0.520961	Os10g0111700	Os03g0128932,Os03g0197200,Os11g0637100
BP	GO:0065008	regulation of biological quality	8	4	12	867	0.1202	0.523247	Os02g0649900(YELLOW STRIP-LIKE GENE 2),Os03g0667500(ZINC TRANSPORTER 10),Os03g0751100("Oligopeptide Transporter),Os03g0861400,Os04g0401000(PYRICULARIA ORYZAE RESISTANCE 21),Os05g0269200,Os05g0587300,Os07g0255200	Os04g0400000,Os07g0519600,Os09g0344500("O-methyltransferase ZRP4),Os11g0124500
MF	GO:0000982	transcription factor activity, RNA polymerase II core promoter proximal region sequence-specific binding	2	0	2	59	0.12149	0.527123	Os06g0108500,Os06g0667200(MADS BOX GENE 30)	-
BP	GO:0006559	L-phenylalanine catabolic process	0	1	1	14	0.1246	0.530559	-	Os11g0245100(ZETA GLUTATHIONE S-TRANSFERASE 4)
BP	GO:0010305	leaf vascular tissue pattern formation	1	0	1	14	0.1246	0.530559	Os03g0100020(TETRASPANIN 4)	-
BP	GO:0019184	nonribosomal peptide biosynthetic process	1	0	1	14	0.1246	0.530559	Os01g0952800(basic helix-loop-helix protein 056)	-
BP	GO:0043687	post-translational protein modification	0	1	1	14	0.1246	0.530559	-	Os04g0498900
BP	GO:1902222	erythrose 4-phosphate/phosphoenolpyruvate family amino acid catabolic process	0	1	1	14	0.1246	0.530559	-	Os11g0245100(ZETA GLUTATHIONE S-TRANSFERASE 4)
MF	GO:0016018	cyclosporin A binding	0	1	1	13	0.12474	0.530559	-	Os06g0708400(CYCLOPHILIN 19-4)
BP	GO:0097237	cellular response to toxic substance	1	4	5	279	0.1255	0.530559	Os02g0240300(class III peroxidase 29)	Os03g0235000(PEROXIDASE N),Os04g0688500(class III peroxidase 62),Os10g0109600(PEROXIDASE A),Os11g0112200(class III peroxidase 131)
BP	GO:1990748	cellular detoxification	1	4	5	279	0.1255	0.530559	Os02g0240300(class III peroxidase 29)	Os03g0235000(PEROXIDASE N),Os04g0688500(class III peroxidase 62),Os10g0109600(PEROXIDASE A),Os11g0112200(class III peroxidase 131)
MF	GO:0016209	antioxidant activity	1	4	5	260	0.12746	0.537124	Os02g0240300(class III peroxidase 29)	Os03g0235000(PEROXIDASE N),Os04g0688500(class III peroxidase 62),Os10g0109600(PEROXIDASE A),Os11g0112200(class III peroxidase 131)
CC	GO:0009523	photosystem II	2	0	2	72	0.1287	0.540622	Os01g0600900(CHLOROPHYLL A/B BINDING PROTEIN 2R),Os04g0457000("light-harvesting protein CP24)	-
MF	GO:0005215	transporter activity	9	11	20	1499	0.13087	0.547992	Os01g0232000(TONOPLAST INTRINSIC PROTEIN 4;3),Os02g0649900(YELLOW STRIP-LIKE GENE 2),Os03g0667500(ZINC TRANSPORTER 10),Os03g0751100("Oligopeptide Transporter),Os05g0269200,Os06g0188400(Glutamate receptor homolog 4.1),Os06g0561800(MULTIDRUG RESISTANCE-ASSOCIATED PROTEIN 11),Os10g0111700,Os12g0194900("amino acid permease 10B)	Os01g0902100(MULTIDRUG RESISTANCE-ASSOCIATED PROTEIN 2),Os03g0128932,Os03g0197200,Os05g0472400("zinc transporter 9),Os05g0472700(ZINC TRANSPORTER 5),Os07g0519600,Os08g0466200(HIGH-AFFINITY POTASSIUM(K+) TRANSPORTER 4),Os11g0124500,Os11g0508600(11N3),Os11g0637100,Os12g0476200(SWEET13)
BP	GO:0042446	hormone biosynthetic process	0	2	2	67	0.1322	0.549101	-	Os07g0519600,Os09g0344500("O-methyltransferase ZRP4)
BP	GO:1901606	alpha-amino acid catabolic process	0	2	2	67	0.1322	0.549101	-	Os09g0110300(cyclase-like 4),Os11g0245100(ZETA GLUTATHIONE S-TRANSFERASE 4)
BP	GO:0010018	far-red light signaling pathway	1	0	1	15	0.1328	0.549101	Os08g0246800	-
BP	GO:0071490	cellular response to far red light	1	0	1	15	0.1328	0.549101	Os08g0246800	-
MF	GO:0016423	tRNA (guanine) methyltransferase activity	0	1	1	14	0.13367	0.550971	-	Os10g0442400
MF	GO:0030246	carbohydrate binding	1	7	8	496	0.13553	0.556897	Os05g0375400("(1)	Os01g0115600(RECEPTOR-LIKE CYTOPLASMIC KINASE 11),Os01g0137700,Os01g0940800("beta-1),Os04g0369100(RECEPTOR-LIKE CYTOPLASMIC KINASE 145),Os06g0726100(CHITINASE 3),Os07g0131375,Os10g0543400
BP	GO:0016143	S-glycoside metabolic process	1	0	1	16	0.141	0.573081	Os12g0582700	-
BP	GO:0019757	glycosinolate metabolic process	1	0	1	16	0.141	0.573081	Os12g0582700	-
BP	GO:0019760	glucosinolate metabolic process	1	0	1	16	0.141	0.573081	Os12g0582700	-
BP	GO:0045893	positive regulation of transcription, DNA-templated	5	1	6	372	0.1416	0.573081	Os01g0952800(basic helix-loop-helix protein 056),Os02g0671300(basic helix-loop-helix protein 076),Os06g0108500,Os06g0667200(MADS BOX GENE 30),Os08g0246800	Os02g0564700(basic helix-loop-helix protein 097)
BP	GO:0016052	carbohydrate catabolic process	2	3	5	291	0.1423	0.573081	Os07g0607400(PECTIN METHYLESTERASE 20),Os09g0530200(glycoside hydrolase OsGH9B14)	Os04g0640700,Os06g0726100(CHITINASE 3),Os10g0442400
MF	GO:0015112	nitrate transmembrane transporter activity	0	1	1	15	0.14251	0.573081	-	Os07g0519600
MF	GO:0016744	transferase activity, transferring aldehyde or ketonic groups	1	0	1	15	0.14251	0.573081	Os05g0408900(1-DEOXY-D-XYLULOSE 5-PHOSPHATE SYNTHASE 1)	-
CC	GO:0000148	1,3-beta-D-glucan synthase complex	0	1	1	18	0.1448	0.58052	-	Os02g0247000
BP	GO:0034220	ion transmembrane transport	4	6	10	722	0.147	0.587555	Os01g0232000(TONOPLAST INTRINSIC PROTEIN 4;3),Os03g0667500(ZINC TRANSPORTER 10),Os10g0111700,Os12g0194900("amino acid permease 10B)	Os03g0128932,Os03g0197200,Os05g0472400("zinc transporter 9),Os05g0472700(ZINC TRANSPORTER 5),Os08g0466200(HIGH-AFFINITY POTASSIUM(K+) TRANSPORTER 4),Os11g0637100
BP	GO:0009063	cellular amino acid catabolic process	0	2	2	72	0.1484	0.589206	-	Os09g0110300(cyclase-like 4),Os11g0245100(ZETA GLUTATHIONE S-TRANSFERASE 4)
BP	GO:0015691	cadmium ion transport	1	0	1	17	0.1492	0.589206	Os03g0667500(ZINC TRANSPORTER 10)	-
BP	GO:0015706	nitrate transport	0	1	1	17	0.1492	0.589206	-	Os07g0519600
BP	GO:0042753	positive regulation of circadian rhythm	1	0	1	17	0.1492	0.589206	Os08g0246800	-
MF	GO:0008134	transcription factor binding	3	0	3	132	0.15218	0.59918	Os01g0952800(basic helix-loop-helix protein 056),Os06g0108500,Os06g0667200(MADS BOX GENE 30)	-
BP	GO:0032501	multicellular organismal process	11	4	15	1186	0.1534	0.602186	Os01g0122000("OsPR5),Os01g0669100(Large spike S-domain receptor like Kinase 1),Os02g0649900(YELLOW STRIP-LIKE GENE 2),Os03g0100020(TETRASPANIN 4),Os03g0251350(HAP5C SUBUNIT OF CCAAT-BOX BINDING COMPLEX),Os03g0751100("Oligopeptide Transporter),Os05g0166300,Os06g0108500,Os06g0667200(MADS BOX GENE 30),Os08g0179000,Os09g0530200(glycoside hydrolase OsGH9B14)	Os02g0713700,Os06g0708400(CYCLOPHILIN 19-4),Os07g0519600,Os08g0230800(Lectin Receptor Kinase paralog)
BP	GO:0006074	(1->3)-beta-D-glucan metabolic process	0	1	1	18	0.1572	0.609999	-	Os02g0247000
BP	GO:0006075	(1->3)-beta-D-glucan biosynthetic process	0	1	1	18	0.1572	0.609999	-	Os02g0247000
BP	GO:0043455	regulation of secondary metabolic process	1	0	1	18	0.1572	0.609999	Os01g0952800(basic helix-loop-helix protein 056)	-
MF	GO:0004674	protein serine/threonine kinase activity	9	7	16	1190	0.15724	0.609999	Os01g0669100(Large spike S-domain receptor like Kinase 1),Os01g0883000(RECEPTOR-LIKE CYTOPLASMIC KINASE 50),Os02g0156000(RECEPTOR-LIKE CYTOPLASMIC KINASE 62),Os03g0636800(NIMA-related kinase 1),Os05g0166300,Os05g0398800,Os07g0537500,Os08g0179000,Os08g0441100(CALCINEURIN B-LIKE PROTEIN-INTERACTING PROTEIN KINASE 6)	Os01g0115600(RECEPTOR-LIKE CYTOPLASMIC KINASE 11),Os04g0369066(RECEPTOR-LIKE CYTOPLASMIC KINASE 144),Os04g0369100(RECEPTOR-LIKE CYTOPLASMIC KINASE 145),Os04g0608900(dual-specificity protein kinase 4),Os07g0131375,Os08g0230800(Lectin Receptor Kinase paralog),Os11g0669200(RECEPTOR-LIKE CYTOPLASMIC KINASE 350)
BP	GO:0009072	aromatic amino acid family metabolic process	0	2	2	75	0.1582	0.610134	-	Os09g0110300(cyclase-like 4),Os11g0245100(ZETA GLUTATHIONE S-TRANSFERASE 4)
BP	GO:0050832	defense response to fungus	1	1	2	75	0.1582	0.610134	Os04g0401000(PYRICULARIA ORYZAE RESISTANCE 21)	Os06g0726100(CHITINASE 3)
BP	GO:1902680	positive regulation of RNA biosynthetic process	5	1	6	389	0.1638	0.625032	Os01g0952800(basic helix-loop-helix protein 056),Os02g0671300(basic helix-loop-helix protein 076),Os06g0108500,Os06g0667200(MADS BOX GENE 30),Os08g0246800	Os02g0564700(basic helix-loop-helix protein 097)
BP	GO:1903508	positive regulation of nucleic acid-templated transcription	5	1	6	389	0.1638	0.625032	Os01g0952800(basic helix-loop-helix protein 056),Os02g0671300(basic helix-loop-helix protein 076),Os06g0108500,Os06g0667200(MADS BOX GENE 30),Os08g0246800	Os02g0564700(basic helix-loop-helix protein 097)
BP	GO:0006536	glutamate metabolic process	1	0	1	19	0.1652	0.625032	Os05g0555600(NADH-DEPENDENT GLUTAMATE SYNTHASE 2)	-
BP	GO:0006874	cellular calcium ion homeostasis	0	1	1	19	0.1652	0.625032	-	Os11g0124500
BP	GO:0009873	ethylene-activated signaling pathway	1	0	1	19	0.1652	0.625032	Os01g0952800(basic helix-loop-helix protein 056)	-
BP	GO:0010051	xylem and phloem pattern formation	1	0	1	19	0.1652	0.625032	Os03g0100020(TETRASPANIN 4)	-
MF	GO:0016616	oxidoreductase activity, acting on the CH-OH group of donors, NAD or NADP as acceptor	1	3	4	209	0.16538	0.625032	Os09g0294000	Os02g0811800(CINNAMOYL-COA REDUCTASE 10),Os06g0486900("FDH2),Os09g0127300
MF	GO:0016859	cis-trans isomerase activity	0	2	2	72	0.16702	0.629427	-	Os06g0708400(CYCLOPHILIN 19-4),Os11g0245100(ZETA GLUTATHIONE S-TRANSFERASE 4)
MF	GO:0022838	substrate-specific channel activity	3	0	3	140	0.17185	0.642312	Os01g0232000(TONOPLAST INTRINSIC PROTEIN 4;3),Os05g0269200,Os06g0188400(Glutamate receptor homolog 4.1)	-
BP	GO:0006486	protein glycosylation	2	1	3	151	0.1719	0.642312	Os02g0142250,Os10g0459300	Os04g0506800(STLP3)
BP	GO:0043413	macromolecule glycosylation	2	1	3	151	0.1719	0.642312	Os02g0142250,Os10g0459300	Os04g0506800(STLP3)
BP	GO:0048579	negative regulation of long-day photoperiodism, flowering	1	0	1	20	0.1731	0.643872	Os03g0251350(HAP5C SUBUNIT OF CCAAT-BOX BINDING COMPLEX)	-
BP	GO:0022414	reproductive process	7	3	10	750	0.1736	0.643872	Os01g0669100(Large spike S-domain receptor like Kinase 1),Os02g0649900(YELLOW STRIP-LIKE GENE 2),Os03g0100020(TETRASPANIN 4),Os03g0251350(HAP5C SUBUNIT OF CCAAT-BOX BINDING COMPLEX),Os05g0166300,Os08g0179000,Os09g0530200(glycoside hydrolase OsGH9B14)	Os02g0713700,Os04g0498900,Os08g0230800(Lectin Receptor Kinase paralog)
BP	GO:0009101	glycoprotein biosynthetic process	2	1	3	152	0.1742	0.643872	Os02g0142250,Os10g0459300	Os04g0506800(STLP3)
MF	GO:0016903	oxidoreductase activity, acting on the aldehyde or oxo group of donors	0	2	2	74	0.17427	0.643872	-	Os02g0811800(CINNAMOYL-COA REDUCTASE 10),Os06g0486900("FDH2)
BP	GO:0000003	reproduction	7	3	10	753	0.1765	0.646602	Os01g0669100(Large spike S-domain receptor like Kinase 1),Os02g0649900(YELLOW STRIP-LIKE GENE 2),Os03g0100020(TETRASPANIN 4),Os03g0251350(HAP5C SUBUNIT OF CCAAT-BOX BINDING COMPLEX),Os05g0166300,Os08g0179000,Os09g0530200(glycoside hydrolase OsGH9B14)	Os02g0713700,Os04g0498900,Os08g0230800(Lectin Receptor Kinase paralog)
MF	GO:0003843	1,3-beta-D-glucan synthase activity	0	1	1	19	0.17697	0.646602	-	Os02g0247000
MF	GO:0016307	phosphatidylinositol phosphate kinase activity	0	1	1	19	0.17697	0.646602	-	Os03g0262000
MF	GO:0016894	endonuclease activity, active with either ribo- or deoxyribonucleic acids and producing 3'-phosphomonoesters	0	1	1	19	0.17697	0.646602	-	Os09g0538000(RIBONUCLEASE 5)
MF	GO:0001228	transcriptional activator activity, RNA polymerase II transcription regulatory region sequence-specific binding	1	1	2	75	0.17791	0.648241	Os02g0671300(basic helix-loop-helix protein 076)	Os02g0564700(basic helix-loop-helix protein 097)
BP	GO:0045944	positive regulation of transcription from RNA polymerase II promoter	3	1	4	233	0.1794	0.648389	Os02g0671300(basic helix-loop-helix protein 076),Os06g0108500,Os06g0667200(MADS BOX GENE 30)	Os02g0564700(basic helix-loop-helix protein 097)
BP	GO:0006305	DNA alkylation	1	0	1	21	0.1809	0.648389	Os03g0798300(METHYLTRANSFERASE 1A)	-
BP	GO:0006306	DNA methylation	1	0	1	21	0.1809	0.648389	Os03g0798300(METHYLTRANSFERASE 1A)	-
BP	GO:0006879	cellular iron ion homeostasis	1	0	1	21	0.1809	0.648389	Os02g0649900(YELLOW STRIP-LIKE GENE 2)	-
BP	GO:0010039	response to iron ion	1	0	1	21	0.1809	0.648389	Os02g0649900(YELLOW STRIP-LIKE GENE 2)	-
BP	GO:0071369	cellular response to ethylene stimulus	1	0	1	21	0.1809	0.648389	Os01g0952800(basic helix-loop-helix protein 056)	-
MF	GO:0050661	NADP binding	2	0	2	76	0.18157	0.649027	Os04g0223500,Os09g0294000	-
MF	GO:0003690	double-stranded DNA binding	4	2	6	375	0.18517	0.659038	Os01g0952800(basic helix-loop-helix protein 056),Os02g0671300(basic helix-loop-helix protein 076),Os06g0108500,Os06g0667200(MADS BOX GENE 30)	Os02g0564700(basic helix-loop-helix protein 097),Os02g0713700
MF	GO:0016899	oxidoreductase activity, acting on the CH-OH group of donors, oxygen as acceptor	1	0	1	20	0.18537	0.659038	Os10g0475100	-
BP	GO:0006357	regulation of transcription from RNA polymerase II promoter	5	2	7	493	0.1867	0.659712	Os01g0952800(basic helix-loop-helix protein 056),Os02g0671300(basic helix-loop-helix protein 076),Os06g0108500,Os06g0667200(MADS BOX GENE 30),Os10g0567900	Os02g0564700(basic helix-loop-helix protein 097),Os03g0771100
MF	GO:0015267	channel activity	3	0	3	146	0.18706	0.659712	Os01g0232000(TONOPLAST INTRINSIC PROTEIN 4;3),Os05g0269200,Os06g0188400(Glutamate receptor homolog 4.1)	-
MF	GO:0022803	passive transmembrane transporter activity	3	0	3	146	0.18706	0.659712	Os01g0232000(TONOPLAST INTRINSIC PROTEIN 4;3),Os05g0269200,Os06g0188400(Glutamate receptor homolog 4.1)	-
BP	GO:0007215	glutamate receptor signaling pathway	1	0	1	22	0.1887	0.6602	Os06g0188400(Glutamate receptor homolog 4.1)	-
BP	GO:0035235	ionotropic glutamate receptor signaling pathway	1	0	1	22	0.1887	0.6602	Os06g0188400(Glutamate receptor homolog 4.1)	-
BP	GO:0080163	regulation of protein serine/threonine phosphatase activity	0	1	1	22	0.1887	0.6602	-	Os03g0300400(JASMONATE INDUCIBLE PATHOGENESIS-RELATED CLASS 10 PROTEIN)
BP	GO:0051254	positive regulation of RNA metabolic process	5	1	6	409	0.1916	0.662749	Os01g0952800(basic helix-loop-helix protein 056),Os02g0671300(basic helix-loop-helix protein 076),Os06g0108500,Os06g0667200(MADS BOX GENE 30),Os08g0246800	Os02g0564700(basic helix-loop-helix protein 097)
BP	GO:0002229	defense response to oomycetes	1	1	2	85	0.192	0.662749	Os02g0156000(RECEPTOR-LIKE CYTOPLASMIC KINASE 62)	Os07g0131375
CC	GO:0009521	photosystem	2	0	2	93	0.1923	0.662749	Os01g0600900(CHLOROPHYLL A/B BINDING PROTEIN 2R),Os04g0457000("light-harvesting protein CP24)	-
MF	GO:0016758	transferase activity, transferring hexosyl groups	4	4	8	544	0.1926	0.662749	Os04g0272200,Os10g0178500,Os10g0516600(OsSTA247),Os11g0471300	Os02g0247000,Os04g0506800(STLP3),Os08g0404000,Os10g0442400
MF	GO:0004525	ribonuclease III activity	0	1	1	21	0.19368	0.662749	-	Os08g0148600
MF	GO:0019904	protein domain specific binding	1	0	1	21	0.19368	0.662749	Os04g0457000("light-harvesting protein CP24)	-
MF	GO:0032296	double-stranded RNA-specific ribonuclease activity	0	1	1	21	0.19368	0.662749	-	Os08g0148600
BP	GO:0002239	response to oomycetes	1	1	2	86	0.1954	0.662749	Os02g0156000(RECEPTOR-LIKE CYTOPLASMIC KINASE 62)	Os07g0131375
BP	GO:0010228	vegetative to reproductive phase transition of meristem	1	1	2	86	0.1954	0.662749	Os03g0251350(HAP5C SUBUNIT OF CCAAT-BOX BINDING COMPLEX)	Os02g0713700
BP	GO:0009933	meristem structural organization	1	0	1	23	0.1964	0.662749	Os03g0100020(TETRASPANIN 4)	-
BP	GO:0015850	organic hydroxy compound transport	0	1	1	23	0.1964	0.662749	-	Os03g0128932
BP	GO:0055074	calcium ion homeostasis	0	1	1	23	0.1964	0.662749	-	Os11g0124500
BP	GO:0000302	response to reactive oxygen species	2	0	2	87	0.1988	0.662749	Os01g0136100(16.9 KDA CLASS I HEAT SHOCK PROTEIN 1),Os01g0952800(basic helix-loop-helix protein 056)	-
BP	GO:0044036	cell wall macromolecule metabolic process	0	3	3	163	0.2004	0.662749	-	Os04g0640700,Os06g0726100(CHITINASE 3),Os10g0543400
BP	GO:0008610	lipid biosynthetic process	2	5	7	504	0.201	0.662749	Os02g0142250,Os05g0408900(1-DEOXY-D-XYLULOSE 5-PHOSPHATE SYNTHASE 1)	Os02g0570400(ENT-KAURENE SYNTHASE 7),Os02g0621300("ECERIFERUM 1),Os06g0501900(P-450 76M9),Os07g0519600,Os12g0491800(KAURENE SYNTHASE-LIKE 10)
MF	GO:0004970	ionotropic glutamate receptor activity	1	0	1	22	0.20191	0.662749	Os06g0188400(Glutamate receptor homolog 4.1)	-
MF	GO:0005230	extracellular ligand-gated ion channel activity	1	0	1	22	0.20191	0.662749	Os06g0188400(Glutamate receptor homolog 4.1)	-
MF	GO:0008066	glutamate receptor activity	1	0	1	22	0.20191	0.662749	Os06g0188400(Glutamate receptor homolog 4.1)	-
MF	GO:0022824	transmitter-gated ion channel activity	1	0	1	22	0.20191	0.662749	Os06g0188400(Glutamate receptor homolog 4.1)	-
MF	GO:0022835	transmitter-gated channel activity	1	0	1	22	0.20191	0.662749	Os06g0188400(Glutamate receptor homolog 4.1)	-
MF	GO:0030594	neurotransmitter receptor activity	1	0	1	22	0.20191	0.662749	Os06g0188400(Glutamate receptor homolog 4.1)	-
MF	GO:0046556	alpha-L-arabinofuranosidase activity	0	1	1	22	0.20191	0.662749	-	Os04g0640700
CC	GO:0005795	Golgi stack	0	1	1	26	0.2023	0.662749	-	Os06g0708400(CYCLOPHILIN 19-4)
BP	GO:0006810	transport	13	16	29	2618	0.2039	0.662749	Os01g0232000(TONOPLAST INTRINSIC PROTEIN 4;3),Os02g0649900(YELLOW STRIP-LIKE GENE 2),Os03g0282300,Os03g0667500(ZINC TRANSPORTER 10),Os03g0751100("Oligopeptide Transporter),Os03g0861400,Os04g0401000(PYRICULARIA ORYZAE RESISTANCE 21),Os05g0269200,Os06g0188400(Glutamate receptor homolog 4.1),Os06g0561800(MULTIDRUG RESISTANCE-ASSOCIATED PROTEIN 11),Os10g0111700,Os12g0194900("amino acid permease 10B),…	Os01g0902100(MULTIDRUG RESISTANCE-ASSOCIATED PROTEIN 2),Os02g0575900(EXOCYST SUBUNIT EXO70 FAMILY PROTEIN FX6),Os03g0128932,Os03g0197200,Os04g0400000,Os05g0472400("zinc transporter 9),Os05g0472700(ZINC TRANSPORTER 5),Os05g0509500,Os05g0550300("non-specific lipid transfer protein 2.4),Os07g0519600,Os08g0409900,Os08g0466200(HIGH-AFFINITY POTASSIUM(K+) TRANSPORTER 4),Os11g0124500,Os11g0508600(11N3),…
BP	GO:0007602	phototransduction	1	0	1	24	0.204	0.662749	Os08g0246800	-
BP	GO:0009583	detection of light stimulus	1	0	1	24	0.204	0.662749	Os08g0246800	-
BP	GO:0009585	red, far-red light phototransduction	1	0	1	24	0.204	0.662749	Os08g0246800	-
BP	GO:0042752	regulation of circadian rhythm	1	0	1	24	0.204	0.662749	Os08g0246800	-
BP	GO:0072503	cellular divalent inorganic cation homeostasis	0	1	1	24	0.204	0.662749	-	Os11g0124500
BP	GO:0010628	positive regulation of gene expression	5	1	6	419	0.2061	0.667926	Os01g0952800(basic helix-loop-helix protein 056),Os02g0671300(basic helix-loop-helix protein 076),Os06g0108500,Os06g0667200(MADS BOX GENE 30),Os08g0246800	Os02g0564700(basic helix-loop-helix protein 097)
BP	GO:0009100	glycoprotein metabolic process	2	1	3	166	0.2077	0.671462	Os02g0142250,Os10g0459300	Os04g0506800(STLP3)
BP	GO:0006952	defense response	4	6	10	785	0.2098	0.675746	Os02g0156000(RECEPTOR-LIKE CYTOPLASMIC KINASE 62),Os04g0401000(PYRICULARIA ORYZAE RESISTANCE 21),Os07g0117300,Os08g0170700	Os02g0570400(ENT-KAURENE SYNTHASE 7),Os03g0300400(JASMONATE INDUCIBLE PATHOGENESIS-RELATED CLASS 10 PROTEIN),Os06g0726100(CHITINASE 3),Os07g0131375,Os11g0598500,Os12g0491800(KAURENE SYNTHASE-LIKE 10)
MF	GO:0010427	abscisic acid binding	0	1	1	23	0.21005	0.675746	-	Os03g0300400(JASMONATE INDUCIBLE PATHOGENESIS-RELATED CLASS 10 PROTEIN)
BP	GO:0010218	response to far red light	1	0	1	25	0.2115	0.677108	Os08g0246800	-
BP	GO:0048532	anatomical structure arrangement	1	0	1	25	0.2115	0.677108	Os03g0100020(TETRASPANIN 4)	-
BP	GO:0010557	positive regulation of macromolecule biosynthetic process	5	1	6	423	0.2121	0.677385	Os01g0952800(basic helix-loop-helix protein 056),Os02g0671300(basic helix-loop-helix protein 076),Os06g0108500,Os06g0667200(MADS BOX GENE 30),Os08g0246800	Os02g0564700(basic helix-loop-helix protein 097)
CC	GO:0046658	anchored component of plasma membrane	2	1	3	184	0.2135	0.679885	Os05g0375400("(1),Os08g0137400(UCLACYANIN-LIKE PROTEIN 23)	Os01g0940800("beta-1)
MF	GO:0000977	RNA polymerase II regulatory region sequence-specific DNA binding	3	0	3	157	0.21578	0.679885	Os01g0952800(basic helix-loop-helix protein 056),Os06g0108500,Os06g0667200(MADS BOX GENE 30)	-
BP	GO:0009620	response to fungus	1	1	2	92	0.2161	0.679885	Os04g0401000(PYRICULARIA ORYZAE RESISTANCE 21)	Os06g0726100(CHITINASE 3)
BP	GO:0042445	hormone metabolic process	0	2	2	92	0.2161	0.679885	-	Os07g0519600,Os09g0344500("O-methyltransferase ZRP4)
BP	GO:0009607	response to biotic stimulus	2	3	5	338	0.2165	0.679885	Os02g0156000(RECEPTOR-LIKE CYTOPLASMIC KINASE 62),Os04g0401000(PYRICULARIA ORYZAE RESISTANCE 21)	Os03g0300400(JASMONATE INDUCIBLE PATHOGENESIS-RELATED CLASS 10 PROTEIN),Os06g0726100(CHITINASE 3),Os07g0131375
MF	GO:0016638	oxidoreductase activity, acting on the CH-NH2 group of donors	1	0	1	24	0.21812	0.679885	Os05g0555600(NADH-DEPENDENT GLUTAMATE SYNTHASE 2)	-
MF	GO:0019840	isoprenoid binding	0	1	1	24	0.21812	0.679885	-	Os03g0300400(JASMONATE INDUCIBLE PATHOGENESIS-RELATED CLASS 10 PROTEIN)
BP	GO:0006614	SRP-dependent cotranslational protein targeting to membrane	0	1	1	26	0.219	0.679885	-	Os05g0509500
MF	GO:0140110	transcription regulator activity	8	6	14	1087	0.22	0.679885	Os01g0952800(basic helix-loop-helix protein 056),Os02g0671300(basic helix-loop-helix protein 076),Os06g0108500,Os06g0667200(MADS BOX GENE 30),Os08g0246800,Os08g0499300(WRKY GENE 30),Os08g0508700(ETHYLENE INSENSITIVE-LIKE GENE 4),Os10g0567900	Os01g0186000(WRKY GENE 10),Os01g0676900,Os02g0564700(basic helix-loop-helix protein 097),Os02g0713700,Os03g0771100,Os05g0549800(APETALA2/ETHYLENE-RESPONSIVE ELEMENT BINDING PROTEIN 96)
BP	GO:0045935	positive regulation of nucleobase-containing compound metabolic process	5	1	6	429	0.2211	0.679885	Os01g0952800(basic helix-loop-helix protein 056),Os02g0671300(basic helix-loop-helix protein 076),Os06g0108500,Os06g0667200(MADS BOX GENE 30),Os08g0246800	Os02g0564700(basic helix-loop-helix protein 097)
MF	GO:0001012	RNA polymerase II regulatory region DNA binding	3	0	3	159	0.2211	0.679885	Os01g0952800(basic helix-loop-helix protein 056),Os06g0108500,Os06g0667200(MADS BOX GENE 30)	-
MF	GO:0046872	metal ion binding	15	23	38	3290	0.22265	0.679885	Os01g0600900(CHLOROPHYLL A/B BINDING PROTEIN 2R),Os01g0755700,Os02g0240300(class III peroxidase 29),Os02g0258900,Os02g0734400,Os03g0861400,Os04g0401000(PYRICULARIA ORYZAE RESISTANCE 21),Os05g0296200,Os05g0305200,Os05g0408900(1-DEOXY-D-XYLULOSE 5-PHOSPHATE SYNTHASE 1),Os05g0555600(NADH-DEPENDENT GLUTAMATE SYNTHASE 2),Os08g0126700(ZINC FINGER CCCH DOMAIN-CONTAINING PROTEIN 54),Os08g0246800,Os10g048…	Os01g0791033,Os01g0832600,Os02g0570400(ENT-KAURENE SYNTHASE 7),Os02g0607500("protein phosphatase 2C22),Os02g0621300("ECERIFERUM 1),Os03g0347900,Os03g0348200(terpene synthase 10),Os04g0400000,Os04g0581000,Os04g0688500(class III peroxidase 62),Os05g0331200,Os05g0424300,Os06g0501900(P-450 76M9),Os07g0519600,Os07g0588100,Os07g0631700,Os09g0264400,Os09g0275400,Os10g0109600(PEROXIDASE A),Os10g0558750,O…
BP	GO:0009308	amine metabolic process	0	2	2	94	0.2231	0.679885	-	Os07g0689600(NICOTIANAMINE SYNTHASE 3),Os09g0110300(cyclase-like 4)
MF	GO:0022890	inorganic cation transmembrane transporter activity	2	3	5	317	0.22313	0.679885	Os03g0667500(ZINC TRANSPORTER 10),Os03g0751100("Oligopeptide Transporter)	Os05g0472400("zinc transporter 9),Os05g0472700(ZINC TRANSPORTER 5),Os08g0466200(HIGH-AFFINITY POTASSIUM(K+) TRANSPORTER 4)
BP	GO:0031328	positive regulation of cellular biosynthetic process	5	1	6	431	0.2241	0.679885	Os01g0952800(basic helix-loop-helix protein 056),Os02g0671300(basic helix-loop-helix protein 076),Os06g0108500,Os06g0667200(MADS BOX GENE 30),Os08g0246800	Os02g0564700(basic helix-loop-helix protein 097)
BP	GO:0009891	positive regulation of biosynthetic process	5	1	6	432	0.2256	0.679885	Os01g0952800(basic helix-loop-helix protein 056),Os02g0671300(basic helix-loop-helix protein 076),Os06g0108500,Os06g0667200(MADS BOX GENE 30),Os08g0246800	Os02g0564700(basic helix-loop-helix protein 097)
BP	GO:0051234	establishment of localization	13	16	29	2654	0.2261	0.679885	Os01g0232000(TONOPLAST INTRINSIC PROTEIN 4;3),Os02g0649900(YELLOW STRIP-LIKE GENE 2),Os03g0282300,Os03g0667500(ZINC TRANSPORTER 10),Os03g0751100("Oligopeptide Transporter),Os03g0861400,Os04g0401000(PYRICULARIA ORYZAE RESISTANCE 21),Os05g0269200,Os06g0188400(Glutamate receptor homolog 4.1),Os06g0561800(MULTIDRUG RESISTANCE-ASSOCIATED PROTEIN 11),Os10g0111700,Os12g0194900("amino acid permease 10B),…	Os01g0902100(MULTIDRUG RESISTANCE-ASSOCIATED PROTEIN 2),Os02g0575900(EXOCYST SUBUNIT EXO70 FAMILY PROTEIN FX6),Os03g0128932,Os03g0197200,Os04g0400000,Os05g0472400("zinc transporter 9),Os05g0472700(ZINC TRANSPORTER 5),Os05g0509500,Os05g0550300("non-specific lipid transfer protein 2.4),Os07g0519600,Os08g0409900,Os08g0466200(HIGH-AFFINITY POTASSIUM(K+) TRANSPORTER 4),Os11g0124500,Os11g0508600(11N3),…
MF	GO:0015276	ligand-gated ion channel activity	1	0	1	25	0.2261	0.679885	Os06g0188400(Glutamate receptor homolog 4.1)	-
MF	GO:0022834	ligand-gated channel activity	1	0	1	25	0.2261	0.679885	Os06g0188400(Glutamate receptor homolog 4.1)	-
BP	GO:0006558	L-phenylalanine metabolic process	0	1	1	27	0.2264	0.679885	-	Os11g0245100(ZETA GLUTATHIONE S-TRANSFERASE 4)
BP	GO:0006568	tryptophan metabolic process	0	1	1	27	0.2264	0.679885	-	Os09g0110300(cyclase-like 4)
BP	GO:0006586	indolalkylamine metabolic process	0	1	1	27	0.2264	0.679885	-	Os09g0110300(cyclase-like 4)
BP	GO:0030245	cellulose catabolic process	1	0	1	27	0.2264	0.679885	Os09g0530200(glycoside hydrolase OsGH9B14)	-
BP	GO:0043650	dicarboxylic acid biosynthetic process	1	0	1	27	0.2264	0.679885	Os05g0555600(NADH-DEPENDENT GLUTAMATE SYNTHASE 2)	-
BP	GO:0051275	beta-glucan catabolic process	1	0	1	27	0.2264	0.679885	Os09g0530200(glycoside hydrolase OsGH9B14)	-
BP	GO:1902221	erythrose 4-phosphate/phosphoenolpyruvate family amino acid metabolic process	0	1	1	27	0.2264	0.679885	-	Os11g0245100(ZETA GLUTATHIONE S-TRANSFERASE 4)
BP	GO:0010035	response to inorganic substance	3	2	5	344	0.2268	0.679885	Os01g0136100(16.9 KDA CLASS I HEAT SHOCK PROTEIN 1),Os01g0952800(basic helix-loop-helix protein 056),Os02g0649900(YELLOW STRIP-LIKE GENE 2)	Os07g0519600,Os09g0110300(cyclase-like 4)
MF	GO:0000975	regulatory region DNA binding	4	2	6	403	0.22971	0.683945	Os01g0952800(basic helix-loop-helix protein 056),Os02g0671300(basic helix-loop-helix protein 076),Os06g0108500,Os06g0667200(MADS BOX GENE 30)	Os02g0564700(basic helix-loop-helix protein 097),Os03g0771100
MF	GO:0001067	regulatory region nucleic acid binding	4	2	6	403	0.22971	0.683945	Os01g0952800(basic helix-loop-helix protein 056),Os02g0671300(basic helix-loop-helix protein 076),Os06g0108500,Os06g0667200(MADS BOX GENE 30)	Os02g0564700(basic helix-loop-helix protein 097),Os03g0771100
MF	GO:0044212	transcription regulatory region DNA binding	4	2	6	403	0.22971	0.683945	Os01g0952800(basic helix-loop-helix protein 056),Os02g0671300(basic helix-loop-helix protein 076),Os06g0108500,Os06g0667200(MADS BOX GENE 30)	Os02g0564700(basic helix-loop-helix protein 097),Os03g0771100
CC	GO:0031225	anchored component of membrane	2	1	3	192	0.2316	0.687378	Os05g0375400("(1),Os08g0137400(UCLACYANIN-LIKE PROTEIN 23)	Os01g0940800("beta-1)
MF	GO:0016705	oxidoreductase activity, acting on paired donors, with incorporation or reduction of molecular oxygen	2	5	7	489	0.2329	0.687378	Os04g0223500,Os12g0582700	Os05g0424300,Os06g0501900(P-450 76M9),Os07g0519600,Os09g0264400,Os09g0275400
BP	GO:0051273	beta-glucan metabolic process	1	1	2	97	0.2335	0.687378	Os09g0530200(glycoside hydrolase OsGH9B14)	Os02g0247000
BP	GO:0006275	regulation of DNA replication	0	1	1	28	0.2337	0.687378	-	Os04g0498900
BP	GO:0044728	DNA methylation or demethylation	1	0	1	28	0.2337	0.687378	Os03g0798300(METHYLTRANSFERASE 1A)	-
MF	GO:0008810	cellulase activity	1	0	1	26	0.23399	0.687378	Os09g0530200(glycoside hydrolase OsGH9B14)	-
MF	GO:0043565	sequence-specific DNA binding	6	5	11	836	0.23454	0.687463	Os01g0952800(basic helix-loop-helix protein 056),Os02g0671300(basic helix-loop-helix protein 076),Os06g0108500,Os06g0667200(MADS BOX GENE 30),Os08g0136100(RICE OUTMOST CELL-SPECIFIC GENE 7),Os08g0499300(WRKY GENE 30)	Os01g0186000(WRKY GENE 10),Os02g0564700(basic helix-loop-helix protein 097),Os02g0713700,Os03g0771100,Os09g0101300
MF	GO:0043169	cation binding	15	23	38	3315	0.23761	0.693364	Os01g0600900(CHLOROPHYLL A/B BINDING PROTEIN 2R),Os01g0755700,Os02g0240300(class III peroxidase 29),Os02g0258900,Os02g0734400,Os03g0861400,Os04g0401000(PYRICULARIA ORYZAE RESISTANCE 21),Os05g0296200,Os05g0305200,Os05g0408900(1-DEOXY-D-XYLULOSE 5-PHOSPHATE SYNTHASE 1),Os05g0555600(NADH-DEPENDENT GLUTAMATE SYNTHASE 2),Os08g0126700(ZINC FINGER CCCH DOMAIN-CONTAINING PROTEIN 54),Os08g0246800,Os10g048…	Os01g0791033,Os01g0832600,Os02g0570400(ENT-KAURENE SYNTHASE 7),Os02g0607500("protein phosphatase 2C22),Os02g0621300("ECERIFERUM 1),Os03g0347900,Os03g0348200(terpene synthase 10),Os04g0400000,Os04g0581000,Os04g0688500(class III peroxidase 62),Os05g0331200,Os05g0424300,Os06g0501900(P-450 76M9),Os07g0519600,Os07g0588100,Os07g0631700,Os09g0264400,Os09g0275400,Os10g0109600(PEROXIDASE A),Os10g0558750,O…
BP	GO:0006613	cotranslational protein targeting to membrane	0	1	1	29	0.2409	0.693364	-	Os05g0509500
BP	GO:0009084	glutamine family amino acid biosynthetic process	1	0	1	29	0.2409	0.693364	Os05g0555600(NADH-DEPENDENT GLUTAMATE SYNTHASE 2)	-
BP	GO:0009581	detection of external stimulus	1	0	1	29	0.2409	0.693364	Os08g0246800	-
BP	GO:0009582	detection of abiotic stimulus	1	0	1	29	0.2409	0.693364	Os08g0246800	-
BP	GO:0034250	positive regulation of cellular amide metabolic process	1	0	1	29	0.2409	0.693364	Os01g0952800(basic helix-loop-helix protein 056)	-
BP	GO:0042435	indole-containing compound biosynthetic process	0	1	1	29	0.2409	0.693364	-	Os09g0344500("O-methyltransferase ZRP4)
MF	GO:0003680	AT DNA binding	0	1	1	27	0.24181	0.693364	-	Os02g0713700
MF	GO:0008175	tRNA methyltransferase activity	0	1	1	27	0.24181	0.693364	-	Os10g0442400
MF	GO:0008308	voltage-gated anion channel activity	1	0	1	27	0.24181	0.693364	Os05g0269200	-
BP	GO:0098542	defense response to other organism	2	2	4	266	0.2443	0.698984	Os02g0156000(RECEPTOR-LIKE CYTOPLASMIC KINASE 62),Os04g0401000(PYRICULARIA ORYZAE RESISTANCE 21)	Os06g0726100(CHITINASE 3),Os07g0131375
BP	GO:0044282	small molecule catabolic process	0	3	3	182	0.2475	0.70224	-	Os06g0486900("FDH2),Os09g0110300(cyclase-like 4),Os11g0245100(ZETA GLUTATHIONE S-TRANSFERASE 4)
BP	GO:0015698	inorganic anion transport	1	1	2	101	0.2475	0.70224	Os05g0269200	Os07g0519600
BP	GO:0006541	glutamine metabolic process	1	0	1	30	0.2481	0.70224	Os05g0555600(NADH-DEPENDENT GLUTAMATE SYNTHASE 2)	-
BP	GO:0015995	chlorophyll biosynthetic process	1	0	1	30	0.2481	0.70224	Os05g0408900(1-DEOXY-D-XYLULOSE 5-PHOSPHATE SYNTHASE 1)	-
BP	GO:0030422	production of siRNA involved in RNA interference	0	1	1	30	0.2481	0.70224	-	Os08g0148600
MF	GO:0005253	anion channel activity	1	0	1	28	0.24955	0.703326	Os05g0269200	-
MF	GO:0017056	structural constituent of nuclear pore	1	0	1	28	0.24955	0.703326	Os12g0236100	-
MF	GO:0051536	iron-sulfur cluster binding	2	1	3	171	0.25353	0.708928	Os02g0258900,Os05g0555600(NADH-DEPENDENT GLUTAMATE SYNTHASE 2)	Os03g0196400
MF	GO:0051540	metal cluster binding	2	1	3	171	0.25353	0.708928	Os02g0258900,Os05g0555600(NADH-DEPENDENT GLUTAMATE SYNTHASE 2)	Os03g0196400
BP	GO:0009809	lignin biosynthetic process	0	1	1	31	0.2553	0.708928	-	Os02g0811800(CINNAMOYL-COA REDUCTASE 10)
BP	GO:0032515	negative regulation of phosphoprotein phosphatase activity	0	1	1	31	0.2553	0.708928	-	Os03g0300400(JASMONATE INDUCIBLE PATHOGENESIS-RELATED CLASS 10 PROTEIN)
BP	GO:0035308	negative regulation of protein dephosphorylation	0	1	1	31	0.2553	0.708928	-	Os03g0300400(JASMONATE INDUCIBLE PATHOGENESIS-RELATED CLASS 10 PROTEIN)
BP	GO:0045493	xylan catabolic process	0	1	1	31	0.2553	0.708928	-	Os04g0640700
BP	GO:0072507	divalent inorganic cation homeostasis	0	1	1	31	0.2553	0.708928	-	Os11g0124500
MF	GO:0043178	alcohol binding	0	1	1	29	0.25721	0.712731	-	Os03g0300400(JASMONATE INDUCIBLE PATHOGENESIS-RELATED CLASS 10 PROTEIN)
MF	GO:0022836	gated channel activity	2	0	2	97	0.26007	0.717667	Os05g0269200,Os06g0188400(Glutamate receptor homolog 4.1)	-
BP	GO:0006304	DNA modification	1	0	1	32	0.2623	0.717667	Os03g0798300(METHYLTRANSFERASE 1A)	-
BP	GO:0010923	negative regulation of phosphatase activity	0	1	1	32	0.2623	0.717667	-	Os03g0300400(JASMONATE INDUCIBLE PATHOGENESIS-RELATED CLASS 10 PROTEIN)
BP	GO:0016246	RNA interference	0	1	1	32	0.2623	0.717667	-	Os08g0148600
BP	GO:0034754	cellular hormone metabolic process	0	1	1	32	0.2623	0.717667	-	Os09g0344500("O-methyltransferase ZRP4)
BP	GO:0035305	negative regulation of dephosphorylation	0	1	1	32	0.2623	0.717667	-	Os03g0300400(JASMONATE INDUCIBLE PATHOGENESIS-RELATED CLASS 10 PROTEIN)
BP	GO:1902600	hydrogen ion transmembrane transport	1	3	4	275	0.2628	0.717667	Os10g0111700	Os03g0128932,Os03g0197200,Os11g0637100
BP	GO:0015672	monovalent inorganic cation transport	1	4	5	365	0.2637	0.718637	Os10g0111700	Os03g0128932,Os03g0197200,Os08g0466200(HIGH-AFFINITY POTASSIUM(K+) TRANSPORTER 4),Os11g0637100
MF	GO:0050660	flavin adenine dinucleotide binding	3	0	3	175	0.26449	0.719208	Os04g0223500,Os05g0555600(NADH-DEPENDENT GLUTAMATE SYNTHASE 2),Os10g0475100	-
BP	GO:0019684	photosynthesis, light reaction	2	0	2	106	0.265	0.719208	Os01g0600900(CHLOROPHYLL A/B BINDING PROTEIN 2R),Os04g0457000("light-harvesting protein CP24)	-
BP	GO:0006818	hydrogen transport	1	3	4	278	0.2691	0.723973	Os10g0111700	Os03g0128932,Os03g0197200,Os11g0637100
BP	GO:0015992	proton transport	1	3	4	278	0.2691	0.723973	Os10g0111700	Os03g0128932,Os03g0197200,Os11g0637100
BP	GO:0030488	tRNA methylation	0	1	1	33	0.2693	0.723973	-	Os10g0442400
BP	GO:0048586	regulation of long-day photoperiodism, flowering	1	0	1	33	0.2693	0.723973	Os03g0251350(HAP5C SUBUNIT OF CCAAT-BOX BINDING COMPLEX)	-
BP	GO:0009605	response to external stimulus	4	2	6	460	0.2695	0.723973	Os01g0952800(basic helix-loop-helix protein 056),Os02g0156000(RECEPTOR-LIKE CYTOPLASMIC KINASE 62),Os04g0401000(PYRICULARIA ORYZAE RESISTANCE 21),Os08g0246800	Os06g0726100(CHITINASE 3),Os07g0131375
MF	GO:0004521	endoribonuclease activity	0	2	2	100	0.27141	0.725583	-	Os08g0148600,Os09g0538000(RIBONUCLEASE 5)
BP	GO:1903046	meiotic cell cycle process	1	1	2	108	0.272	0.725583	Os03g0100020(TETRASPANIN 4)	Os04g0498900
MF	GO:0004864	protein phosphatase inhibitor activity	0	1	1	31	0.2723	0.725583	-	Os03g0300400(JASMONATE INDUCIBLE PATHOGENESIS-RELATED CLASS 10 PROTEIN)
MF	GO:0042562	hormone binding	0	1	1	31	0.2723	0.725583	-	Os03g0300400(JASMONATE INDUCIBLE PATHOGENESIS-RELATED CLASS 10 PROTEIN)
BP	GO:1901605	alpha-amino acid metabolic process	2	2	4	280	0.2733	0.725713	Os05g0555600(NADH-DEPENDENT GLUTAMATE SYNTHASE 2),Os09g0294000	Os09g0110300(cyclase-like 4),Os11g0245100(ZETA GLUTATHIONE S-TRANSFERASE 4)
MF	GO:0016765	transferase activity, transferring alkyl or aryl (other than methyl) groups	0	3	3	179	0.27551	0.725713	-	Os01g0558100(TAU GLUTATHIONE S-TRANSFERASE 6),Os07g0689600(NICOTIANAMINE SYNTHASE 3),Os11g0245100(ZETA GLUTATHIONE S-TRANSFERASE 4)
BP	GO:0007062	sister chromatid cohesion	0	1	1	34	0.2762	0.725713	-	Os04g0498900
BP	GO:0009626	plant-type hypersensitive response	0	1	1	34	0.2762	0.725713	-	Os11g0598500
BP	GO:0010017	red or far-red light signaling pathway	1	0	1	34	0.2762	0.725713	Os08g0246800	-
BP	GO:0034050	host programmed cell death induced by symbiont	0	1	1	34	0.2762	0.725713	-	Os11g0598500
BP	GO:0071489	cellular response to red or far red light	1	0	1	34	0.2762	0.725713	Os08g0246800	-
MF	GO:0004364	glutathione transferase activity	0	2	2	102	0.27896	0.730622	-	Os01g0558100(TAU GLUTATHIONE S-TRANSFERASE 6),Os11g0245100(ZETA GLUTATHIONE S-TRANSFERASE 4)
MF	GO:0004499	N,N-dimethylaniline monooxygenase activity	1	0	1	32	0.27973	0.730622	Os04g0223500	-
MF	GO:0019212	phosphatase inhibitor activity	0	1	1	32	0.27973	0.730622	-	Os03g0300400(JASMONATE INDUCIBLE PATHOGENESIS-RELATED CLASS 10 PROTEIN)
BP	GO:0070085	glycosylation	2	1	3	195	0.2806	0.731445	Os02g0142250,Os10g0459300	Os04g0506800(STLP3)
BP	GO:1901135	carbohydrate derivative metabolic process	4	5	9	752	0.2821	0.732174	Os02g0142250,Os05g0408900(1-DEOXY-D-XYLULOSE 5-PHOSPHATE SYNTHASE 1),Os10g0459300,Os12g0582700	Os04g0506800(STLP3),Os06g0726100(CHITINASE 3),Os10g0442400,Os10g0543400,Os11g0701600
BP	GO:0030148	sphingolipid biosynthetic process	0	1	1	35	0.2831	0.732174	-	Os02g0621300("ECERIFERUM 1)
BP	GO:0045047	protein targeting to ER	0	1	1	35	0.2831	0.732174	-	Os05g0509500
BP	GO:0072599	establishment of protein localization to endoplasmic reticulum	0	1	1	35	0.2831	0.732174	-	Os05g0509500
MF	GO:0005216	ion channel activity	2	0	2	104	0.28651	0.739543	Os05g0269200,Os06g0188400(Glutamate receptor homolog 4.1)	-
BP	GO:0006366	transcription from RNA polymerase II promoter	5	2	7	565	0.2871	0.739619	Os01g0952800(basic helix-loop-helix protein 056),Os02g0671300(basic helix-loop-helix protein 076),Os06g0108500,Os06g0667200(MADS BOX GENE 30),Os10g0567900	Os02g0564700(basic helix-loop-helix protein 097),Os03g0771100
BP	GO:0048574	long-day photoperiodism, flowering	1	0	1	36	0.2899	0.743926	Os03g0251350(HAP5C SUBUNIT OF CCAAT-BOX BINDING COMPLEX)	-
BP	GO:2000242	negative regulation of reproductive process	1	0	1	36	0.2899	0.743926	Os03g0251350(HAP5C SUBUNIT OF CCAAT-BOX BINDING COMPLEX)	-
BP	GO:0090502	RNA phosphodiester bond hydrolysis, endonucleolytic	0	2	2	114	0.293	0.746594	-	Os08g0148600,Os09g0538000(RIBONUCLEASE 5)
MF	GO:0008168	methyltransferase activity	1	4	5	354	0.29409	0.746594	Os03g0798300(METHYLTRANSFERASE 1A)	Os06g0314600,Os06g0329900,Os09g0344500("O-methyltransferase ZRP4),Os10g0442400
BP	GO:0002831	regulation of response to biotic stimulus	1	0	1	37	0.2966	0.746594	Os04g0401000(PYRICULARIA ORYZAE RESISTANCE 21)	-
BP	GO:0009309	amine biosynthetic process	0	1	1	37	0.2966	0.746594	-	Os07g0689600(NICOTIANAMINE SYNTHASE 3)
BP	GO:0042401	cellular biogenic amine biosynthetic process	0	1	1	37	0.2966	0.746594	-	Os07g0689600(NICOTIANAMINE SYNTHASE 3)
BP	GO:0042542	response to hydrogen peroxide	1	0	1	37	0.2966	0.746594	Os01g0136100(16.9 KDA CLASS I HEAT SHOCK PROTEIN 1)	-
BP	GO:0046854	phosphatidylinositol phosphorylation	0	1	1	37	0.2966	0.746594	-	Os03g0262000
BP	GO:0048571	long-day photoperiodism	1	0	1	37	0.2966	0.746594	Os03g0251350(HAP5C SUBUNIT OF CCAAT-BOX BINDING COMPLEX)	-
BP	GO:0051259	protein oligomerization	1	0	1	37	0.2966	0.746594	Os01g0136100(16.9 KDA CLASS I HEAT SHOCK PROTEIN 1)	-
BP	GO:0051606	detection of stimulus	1	0	1	37	0.2966	0.746594	Os08g0246800	-
CC	GO:0005770	late endosome	0	1	1	41	0.3	0.751063	-	Os06g0708400(CYCLOPHILIN 19-4)
MF	GO:0008144	drug binding	0	1	1	35	0.30157	0.751063	-	Os06g0708400(CYCLOPHILIN 19-4)
BP	GO:0051179	localization	13	16	29	2766	0.3016	0.751063	Os01g0232000(TONOPLAST INTRINSIC PROTEIN 4;3),Os02g0649900(YELLOW STRIP-LIKE GENE 2),Os03g0282300,Os03g0667500(ZINC TRANSPORTER 10),Os03g0751100("Oligopeptide Transporter),Os03g0861400,Os04g0401000(PYRICULARIA ORYZAE RESISTANCE 21),Os05g0269200,Os06g0188400(Glutamate receptor homolog 4.1),Os06g0561800(MULTIDRUG RESISTANCE-ASSOCIATED PROTEIN 11),Os10g0111700,Os12g0194900("amino acid permease 10B),…	Os01g0902100(MULTIDRUG RESISTANCE-ASSOCIATED PROTEIN 2),Os02g0575900(EXOCYST SUBUNIT EXO70 FAMILY PROTEIN FX6),Os03g0128932,Os03g0197200,Os04g0400000,Os05g0472400("zinc transporter 9),Os05g0472700(ZINC TRANSPORTER 5),Os05g0509500,Os05g0550300("non-specific lipid transfer protein 2.4),Os07g0519600,Os08g0409900,Os08g0466200(HIGH-AFFINITY POTASSIUM(K+) TRANSPORTER 4),Os11g0124500,Os11g0508600(11N3),…
BP	GO:0006487	protein N-linked glycosylation	0	1	1	38	0.3032	0.751063	-	Os04g0506800(STLP3)
BP	GO:0006833	water transport	1	0	1	38	0.3032	0.751063	Os01g0232000(TONOPLAST INTRINSIC PROTEIN 4;3)	-
BP	GO:0042044	fluid transport	1	0	1	38	0.3032	0.751063	Os01g0232000(TONOPLAST INTRINSIC PROTEIN 4;3)	-
BP	GO:0048509	regulation of meristem development	1	0	1	38	0.3032	0.751063	Os03g0100020(TETRASPANIN 4)	-
MF	GO:0004871	signal transducer activity	3	4	7	534	0.30339	0.751063	Os02g0156000(RECEPTOR-LIKE CYTOPLASMIC KINASE 62),Os05g0398800,Os06g0188400(Glutamate receptor homolog 4.1)	Os03g0300400(JASMONATE INDUCIBLE PATHOGENESIS-RELATED CLASS 10 PROTEIN),Os04g0608900(dual-specificity protein kinase 4),Os07g0131375,Os11g0669200(RECEPTOR-LIKE CYTOPLASMIC KINASE 350)
BP	GO:0006749	glutathione metabolic process	0	2	2	117	0.3035	0.751063	-	Os01g0558100(TAU GLUTATHIONE S-TRANSFERASE 6),Os11g0245100(ZETA GLUTATHIONE S-TRANSFERASE 4)
MF	GO:0005372	water transmembrane transporter activity	1	0	1	36	0.3087	0.755316	Os01g0232000(TONOPLAST INTRINSIC PROTEIN 4;3)	-
MF	GO:0015250	water channel activity	1	0	1	36	0.3087	0.755316	Os01g0232000(TONOPLAST INTRINSIC PROTEIN 4;3)	-
MF	GO:0046982	protein heterodimerization activity	2	0	2	110	0.3091	0.755316	Os03g0251350(HAP5C SUBUNIT OF CCAAT-BOX BINDING COMPLEX),Os03g0251425	-
BP	GO:0009407	toxin catabolic process	0	1	1	39	0.3098	0.755316	-	Os01g0558100(TAU GLUTATHIONE S-TRANSFERASE 6)
BP	GO:0016132	brassinosteroid biosynthetic process	0	1	1	39	0.3098	0.755316	-	Os07g0519600
BP	GO:0032101	regulation of response to external stimulus	1	0	1	39	0.3098	0.755316	Os04g0401000(PYRICULARIA ORYZAE RESISTANCE 21)	-
BP	GO:0048581	negative regulation of post-embryonic development	1	0	1	39	0.3098	0.755316	Os03g0251350(HAP5C SUBUNIT OF CCAAT-BOX BINDING COMPLEX)	-
BP	GO:0090487	secondary metabolite catabolic process	0	1	1	39	0.3098	0.755316	-	Os01g0558100(TAU GLUTATHIONE S-TRANSFERASE 6)
BP	GO:0006355	regulation of transcription, DNA-templated	11	12	23	2172	0.3129	0.76055	Os01g0566800(basic helix-loop-helix protein 117),Os01g0952800(basic helix-loop-helix protein 056),Os02g0671300(basic helix-loop-helix protein 076),Os03g0251350(HAP5C SUBUNIT OF CCAAT-BOX BINDING COMPLEX),Os06g0108500,Os06g0667200(MADS BOX GENE 30),Os08g0136100(RICE OUTMOST CELL-SPECIFIC GENE 7),Os08g0246800,Os08g0499300(WRKY GENE 30),Os08g0508700(ETHYLENE INSENSITIVE-LIKE GENE 4),Os10g0567900	Os01g0186000(WRKY GENE 10),Os01g0339500(NAC DOMAIN-CONTAINING PROTEIN 30),Os01g0676900,Os02g0564700(basic helix-loop-helix protein 097),Os02g0713700,Os03g0109000(NAC DOMAIN-CONTAINING PROTEIN 55),Os03g0771100,Os04g0678400(DNA BINDING WITH ONE FINGER 17),Os05g0390800(VQ motif-containing protein 19),Os05g0549800(APETALA2/ETHYLENE-RESPONSIVE ELEMENT BINDING PROTEIN 96),Os07g0628500("basic Helix-Loop…
BP	GO:2000112	regulation of cellular macromolecule biosynthetic process	12	13	25	2375	0.3131	0.76055	Os01g0566800(basic helix-loop-helix protein 117),Os01g0952800(basic helix-loop-helix protein 056),Os02g0611500,Os02g0671300(basic helix-loop-helix protein 076),Os03g0251350(HAP5C SUBUNIT OF CCAAT-BOX BINDING COMPLEX),Os06g0108500,Os06g0667200(MADS BOX GENE 30),Os08g0136100(RICE OUTMOST CELL-SPECIFIC GENE 7),Os08g0246800,Os08g0499300(WRKY GENE 30),Os08g0508700(ETHYLENE INSENSITIVE-LIKE GENE 4),Os1…	Os01g0186000(WRKY GENE 10),Os01g0339500(NAC DOMAIN-CONTAINING PROTEIN 30),Os01g0676900,Os02g0564700(basic helix-loop-helix protein 097),Os02g0713700,Os03g0109000(NAC DOMAIN-CONTAINING PROTEIN 55),Os03g0771100,Os04g0498900,Os04g0678400(DNA BINDING WITH ONE FINGER 17),Os05g0390800(VQ motif-containing protein 19),Os05g0549800(APETALA2/ETHYLENE-RESPONSIVE ELEMENT BINDING PROTEIN 96),Os07g0628500("bas…
BP	GO:0032259	methylation	1	4	5	393	0.3148	0.763274	Os03g0798300(METHYLTRANSFERASE 1A)	Os06g0314600,Os06g0329900,Os09g0344500("O-methyltransferase ZRP4),Os10g0442400
BP	GO:0010167	response to nitrate	0	1	1	40	0.3164	0.765746	-	Os07g0519600
MF	GO:0016741	transferase activity, transferring one-carbon groups	1	4	5	366	0.31796	0.768112	Os03g0798300(METHYLTRANSFERASE 1A)	Os06g0314600,Os06g0329900,Os09g0344500("O-methyltransferase ZRP4),Os10g0442400
BP	GO:0009056	catabolic process	8	14	22	2082	0.3221	0.769575	Os01g0122000("OsPR5),Os01g0613500,Os01g0755700,Os02g0240300(class III peroxidase 29),Os07g0533300,Os07g0607400(PECTIN METHYLESTERASE 20),Os09g0530200(glycoside hydrolase OsGH9B14),Os12g0583300	Os01g0558100(TAU GLUTATHIONE S-TRANSFERASE 6),Os04g0640700,Os04g0688500(class III peroxidase 62),Os06g0486900("FDH2),Os06g0726100(CHITINASE 3),Os09g0110300(cyclase-like 4),Os09g0538000(RIBONUCLEASE 5),Os10g0109600(PEROXIDASE A),Os10g0442400,Os10g0543400,Os11g0112200(class III peroxidase 131),Os11g0245100(ZETA GLUTATHIONE S-TRANSFERASE 4),Os11g0701600,Os12g0595600
BP	GO:0006779	porphyrin-containing compound biosynthetic process	1	0	1	41	0.3229	0.769575	Os05g0408900(1-DEOXY-D-XYLULOSE 5-PHOSPHATE SYNTHASE 1)	-
BP	GO:0010268	brassinosteroid homeostasis	0	1	1	41	0.3229	0.769575	-	Os07g0519600
BP	GO:0018107	peptidyl-threonine phosphorylation	1	0	1	41	0.3229	0.769575	Os08g0441100(CALCINEURIN B-LIKE PROTEIN-INTERACTING PROTEIN KINASE 6)	-
BP	GO:0018210	peptidyl-threonine modification	1	0	1	41	0.3229	0.769575	Os08g0441100(CALCINEURIN B-LIKE PROTEIN-INTERACTING PROTEIN KINASE 6)	-
BP	GO:0043900	regulation of multi-organism process	1	0	1	41	0.3229	0.769575	Os04g0401000(PYRICULARIA ORYZAE RESISTANCE 21)	-
BP	GO:1903506	regulation of nucleic acid-templated transcription	11	12	23	2186	0.3242	0.769575	Os01g0566800(basic helix-loop-helix protein 117),Os01g0952800(basic helix-loop-helix protein 056),Os02g0671300(basic helix-loop-helix protein 076),Os03g0251350(HAP5C SUBUNIT OF CCAAT-BOX BINDING COMPLEX),Os06g0108500,Os06g0667200(MADS BOX GENE 30),Os08g0136100(RICE OUTMOST CELL-SPECIFIC GENE 7),Os08g0246800,Os08g0499300(WRKY GENE 30),Os08g0508700(ETHYLENE INSENSITIVE-LIKE GENE 4),Os10g0567900	Os01g0186000(WRKY GENE 10),Os01g0339500(NAC DOMAIN-CONTAINING PROTEIN 30),Os01g0676900,Os02g0564700(basic helix-loop-helix protein 097),Os02g0713700,Os03g0109000(NAC DOMAIN-CONTAINING PROTEIN 55),Os03g0771100,Os04g0678400(DNA BINDING WITH ONE FINGER 17),Os05g0390800(VQ motif-containing protein 19),Os05g0549800(APETALA2/ETHYLENE-RESPONSIVE ELEMENT BINDING PROTEIN 96),Os07g0628500("basic Helix-Loop…
BP	GO:2001141	regulation of RNA biosynthetic process	11	12	23	2186	0.3242	0.769575	Os01g0566800(basic helix-loop-helix protein 117),Os01g0952800(basic helix-loop-helix protein 056),Os02g0671300(basic helix-loop-helix protein 076),Os03g0251350(HAP5C SUBUNIT OF CCAAT-BOX BINDING COMPLEX),Os06g0108500,Os06g0667200(MADS BOX GENE 30),Os08g0136100(RICE OUTMOST CELL-SPECIFIC GENE 7),Os08g0246800,Os08g0499300(WRKY GENE 30),Os08g0508700(ETHYLENE INSENSITIVE-LIKE GENE 4),Os10g0567900	Os01g0186000(WRKY GENE 10),Os01g0339500(NAC DOMAIN-CONTAINING PROTEIN 30),Os01g0676900,Os02g0564700(basic helix-loop-helix protein 097),Os02g0713700,Os03g0109000(NAC DOMAIN-CONTAINING PROTEIN 55),Os03g0771100,Os04g0678400(DNA BINDING WITH ONE FINGER 17),Os05g0390800(VQ motif-containing protein 19),Os05g0549800(APETALA2/ETHYLENE-RESPONSIVE ELEMENT BINDING PROTEIN 96),Os07g0628500("basic Helix-Loop…
BP	GO:0010038	response to metal ion	2	0	2	123	0.3244	0.769575	Os01g0952800(basic helix-loop-helix protein 056),Os02g0649900(YELLOW STRIP-LIKE GENE 2)	-
BP	GO:0051321	meiotic cell cycle	1	1	2	123	0.3244	0.769575	Os03g0100020(TETRASPANIN 4)	Os04g0498900
BP	GO:0051188	cofactor biosynthetic process	3	0	3	213	0.327	0.773199	Os01g0952800(basic helix-loop-helix protein 056),Os02g0258900,Os05g0408900(1-DEOXY-D-XYLULOSE 5-PHOSPHATE SYNTHASE 1)	-
BP	GO:0010556	regulation of macromolecule biosynthetic process	12	13	25	2393	0.3271	0.773199	Os01g0566800(basic helix-loop-helix protein 117),Os01g0952800(basic helix-loop-helix protein 056),Os02g0611500,Os02g0671300(basic helix-loop-helix protein 076),Os03g0251350(HAP5C SUBUNIT OF CCAAT-BOX BINDING COMPLEX),Os06g0108500,Os06g0667200(MADS BOX GENE 30),Os08g0136100(RICE OUTMOST CELL-SPECIFIC GENE 7),Os08g0246800,Os08g0499300(WRKY GENE 30),Os08g0508700(ETHYLENE INSENSITIVE-LIKE GENE 4),Os1…	Os01g0186000(WRKY GENE 10),Os01g0339500(NAC DOMAIN-CONTAINING PROTEIN 30),Os01g0676900,Os02g0564700(basic helix-loop-helix protein 097),Os02g0713700,Os03g0109000(NAC DOMAIN-CONTAINING PROTEIN 55),Os03g0771100,Os04g0498900,Os04g0678400(DNA BINDING WITH ONE FINGER 17),Os05g0390800(VQ motif-containing protein 19),Os05g0549800(APETALA2/ETHYLENE-RESPONSIVE ELEMENT BINDING PROTEIN 96),Os07g0628500("bas…
BP	GO:0005975	carbohydrate metabolic process	4	8	12	1088	0.333	0.783641	Os05g0375400("(1),Os07g0575500,Os07g0607400(PECTIN METHYLESTERASE 20),Os09g0530200(glycoside hydrolase OsGH9B14)	Os01g0940800("beta-1),Os02g0247000,Os04g0474800(BETA-GLUCOSIDASE 12),Os04g0506800(STLP3),Os04g0640700,Os06g0726100(CHITINASE 3),Os10g0442400,Os11g0701600
BP	GO:0006790	sulfur compound metabolic process	2	2	4	309	0.3349	0.783641	Os05g0408900(1-DEOXY-D-XYLULOSE 5-PHOSPHATE SYNTHASE 1),Os12g0582700	Os01g0558100(TAU GLUTATHIONE S-TRANSFERASE 6),Os11g0245100(ZETA GLUTATHIONE S-TRANSFERASE 4)
BP	GO:0033014	tetrapyrrole biosynthetic process	1	0	1	43	0.3356	0.783641	Os05g0408900(1-DEOXY-D-XYLULOSE 5-PHOSPHATE SYNTHASE 1)	-
BP	GO:2000028	regulation of photoperiodism, flowering	1	0	1	43	0.3356	0.783641	Os03g0251350(HAP5C SUBUNIT OF CCAAT-BOX BINDING COMPLEX)	-
BP	GO:0071554	cell wall organization or biogenesis	2	5	7	601	0.3416	0.783641	Os07g0607400(PECTIN METHYLESTERASE 20),Os09g0530200(glycoside hydrolase OsGH9B14)	Os04g0640700,Os04g0688500(class III peroxidase 62),Os06g0273500("leaf senescence protein),Os06g0726100(CHITINASE 3),Os10g0543400
BP	GO:0009409	response to cold	0	2	2	128	0.3416	0.783641	-	Os02g0621300("ECERIFERUM 1),Os09g0110300(cyclase-like 4)
BP	GO:0006997	nucleus organization	1	0	1	44	0.3419	0.783641	Os12g0236100	-
BP	GO:0016131	brassinosteroid metabolic process	0	1	1	44	0.3419	0.783641	-	Os07g0519600
BP	GO:0031050	dsRNA fragmentation	0	1	1	44	0.3419	0.783641	-	Os08g0148600
BP	GO:0043331	response to dsRNA	0	1	1	44	0.3419	0.783641	-	Os08g0148600
BP	GO:0045132	meiotic chromosome segregation	0	1	1	44	0.3419	0.783641	-	Os04g0498900
BP	GO:0051241	negative regulation of multicellular organismal process	1	0	1	44	0.3419	0.783641	Os03g0251350(HAP5C SUBUNIT OF CCAAT-BOX BINDING COMPLEX)	-
BP	GO:0070918	production of small RNA involved in gene silencing by RNA	0	1	1	44	0.3419	0.783641	-	Os08g0148600
BP	GO:0071359	cellular response to dsRNA	0	1	1	44	0.3419	0.783641	-	Os08g0148600
BP	GO:1902531	regulation of intracellular signal transduction	1	0	1	44	0.3419	0.783641	Os01g0952800(basic helix-loop-helix protein 056)	-
MF	GO:0038023	signaling receptor activity	3	2	5	378	0.34205	0.783641	Os02g0156000(RECEPTOR-LIKE CYTOPLASMIC KINASE 62),Os05g0398800,Os06g0188400(Glutamate receptor homolog 4.1)	Os03g0300400(JASMONATE INDUCIBLE PATHOGENESIS-RELATED CLASS 10 PROTEIN),Os07g0131375
BP	GO:0008152	metabolic process	62	72	134	13877	0.3422	0.783641	Os01g0122000("OsPR5),Os01g0191200,Os01g0197450,Os01g0566800(basic helix-loop-helix protein 117),Os01g0600900(CHLOROPHYLL A/B BINDING PROTEIN 2R),Os01g0613500,Os01g0669100(Large spike S-domain receptor like Kinase 1),Os01g0715900,Os01g0727840("Subtilisin 3),Os01g0755700,Os01g0806000,Os01g0883000(RECEPTOR-LIKE CYTOPLASMIC KINASE 50),Os01g0952800(basic helix-loop-helix protein 056),Os02g0142250,Os02…	CAA34008,Os01g0115600(RECEPTOR-LIKE CYTOPLASMIC KINASE 11),Os01g0186000(WRKY GENE 10),Os01g0339500(NAC DOMAIN-CONTAINING PROTEIN 30),Os01g0558100(TAU GLUTATHIONE S-TRANSFERASE 6),Os01g0676900,Os01g0832600,Os01g0940800("beta-1),Os02g0247000,Os02g0564700(basic helix-loop-helix protein 097),Os02g0570400(ENT-KAURENE SYNTHASE 7),Os02g0607500("protein phosphatase 2C22),Os02g0621300("ECERIFERUM 1),Os02g…
MF	GO:0010181	FMN binding	1	0	1	41	0.34329	0.783641	Os05g0555600(NADH-DEPENDENT GLUTAMATE SYNTHASE 2)	-
MF	GO:0043130	ubiquitin binding	1	0	1	41	0.34329	0.783641	Os01g0806000	-
BP	GO:0051707	response to other organism	2	2	4	313	0.3434	0.783641	Os02g0156000(RECEPTOR-LIKE CYTOPLASMIC KINASE 62),Os04g0401000(PYRICULARIA ORYZAE RESISTANCE 21)	Os06g0726100(CHITINASE 3),Os07g0131375
BP	GO:0031326	regulation of cellular biosynthetic process	12	13	25	2419	0.3477	0.78778	Os01g0566800(basic helix-loop-helix protein 117),Os01g0952800(basic helix-loop-helix protein 056),Os02g0611500,Os02g0671300(basic helix-loop-helix protein 076),Os03g0251350(HAP5C SUBUNIT OF CCAAT-BOX BINDING COMPLEX),Os06g0108500,Os06g0667200(MADS BOX GENE 30),Os08g0136100(RICE OUTMOST CELL-SPECIFIC GENE 7),Os08g0246800,Os08g0499300(WRKY GENE 30),Os08g0508700(ETHYLENE INSENSITIVE-LIKE GENE 4),Os1…	Os01g0186000(WRKY GENE 10),Os01g0339500(NAC DOMAIN-CONTAINING PROTEIN 30),Os01g0676900,Os02g0564700(basic helix-loop-helix protein 097),Os02g0713700,Os03g0109000(NAC DOMAIN-CONTAINING PROTEIN 55),Os03g0771100,Os04g0498900,Os04g0678400(DNA BINDING WITH ONE FINGER 17),Os05g0390800(VQ motif-containing protein 19),Os05g0549800(APETALA2/ETHYLENE-RESPONSIVE ELEMENT BINDING PROTEIN 96),Os07g0628500("bas…
MF	GO:0004872	receptor activity	3	2	5	381	0.3481	0.78778	Os02g0156000(RECEPTOR-LIKE CYTOPLASMIC KINASE 62),Os05g0398800,Os06g0188400(Glutamate receptor homolog 4.1)	Os03g0300400(JASMONATE INDUCIBLE PATHOGENESIS-RELATED CLASS 10 PROTEIN),Os07g0131375
BP	GO:0016129	phytosteroid biosynthetic process	0	1	1	45	0.3482	0.78778	-	Os07g0519600
BP	GO:0046834	lipid phosphorylation	0	1	1	45	0.3482	0.78778	-	Os03g0262000
BP	GO:0072329	monocarboxylic acid catabolic process	0	1	1	45	0.3482	0.78778	-	Os06g0486900("FDH2)
BP	GO:0019219	regulation of nucleobase-containing compound metabolic process	11	13	24	2319	0.3496	0.789593	Os01g0566800(basic helix-loop-helix protein 117),Os01g0952800(basic helix-loop-helix protein 056),Os02g0671300(basic helix-loop-helix protein 076),Os03g0251350(HAP5C SUBUNIT OF CCAAT-BOX BINDING COMPLEX),Os06g0108500,Os06g0667200(MADS BOX GENE 30),Os08g0136100(RICE OUTMOST CELL-SPECIFIC GENE 7),Os08g0246800,Os08g0499300(WRKY GENE 30),Os08g0508700(ETHYLENE INSENSITIVE-LIKE GENE 4),Os10g0567900	Os01g0186000(WRKY GENE 10),Os01g0339500(NAC DOMAIN-CONTAINING PROTEIN 30),Os01g0676900,Os02g0564700(basic helix-loop-helix protein 097),Os02g0713700,Os03g0109000(NAC DOMAIN-CONTAINING PROTEIN 55),Os03g0771100,Os04g0498900,Os04g0678400(DNA BINDING WITH ONE FINGER 17),Os05g0390800(VQ motif-containing protein 19),Os05g0549800(APETALA2/ETHYLENE-RESPONSIVE ELEMENT BINDING PROTEIN 96),Os07g0628500("bas…
BP	GO:0009889	regulation of biosynthetic process	12	13	25	2424	0.3517	0.792701	Os01g0566800(basic helix-loop-helix protein 117),Os01g0952800(basic helix-loop-helix protein 056),Os02g0611500,Os02g0671300(basic helix-loop-helix protein 076),Os03g0251350(HAP5C SUBUNIT OF CCAAT-BOX BINDING COMPLEX),Os06g0108500,Os06g0667200(MADS BOX GENE 30),Os08g0136100(RICE OUTMOST CELL-SPECIFIC GENE 7),Os08g0246800,Os08g0499300(WRKY GENE 30),Os08g0508700(ETHYLENE INSENSITIVE-LIKE GENE 4),Os1…	Os01g0186000(WRKY GENE 10),Os01g0339500(NAC DOMAIN-CONTAINING PROTEIN 30),Os01g0676900,Os02g0564700(basic helix-loop-helix protein 097),Os02g0713700,Os03g0109000(NAC DOMAIN-CONTAINING PROTEIN 55),Os03g0771100,Os04g0498900,Os04g0678400(DNA BINDING WITH ONE FINGER 17),Os05g0390800(VQ motif-containing protein 19),Os05g0549800(APETALA2/ETHYLENE-RESPONSIVE ELEMENT BINDING PROTEIN 96),Os07g0628500("bas…
MF	GO:0016757	transferase activity, transferring glycosyl groups	5	4	9	747	0.35246	0.792701	Os04g0272200,Os10g0178500,Os10g0459300,Os10g0516600(OsSTA247),Os11g0471300	Os02g0247000,Os04g0506800(STLP3),Os08g0404000,Os10g0442400
MF	GO:0008236	serine-type peptidase activity	3	0	3	207	0.35338	0.792701	Os01g0727840("Subtilisin 3),Os01g0806000,Os11g0461000(SERINE CARBOXYPEPTIDASE 61)	-
MF	GO:0017171	serine hydrolase activity	3	0	3	207	0.35338	0.792701	Os01g0727840("Subtilisin 3),Os01g0806000,Os11g0461000(SERINE CARBOXYPEPTIDASE 61)	-
BP	GO:0051093	negative regulation of developmental process	1	0	1	46	0.3543	0.793415	Os03g0251350(HAP5C SUBUNIT OF CCAAT-BOX BINDING COMPLEX)	-
BP	GO:0043207	response to external biotic stimulus	2	2	4	319	0.3563	0.796542	Os02g0156000(RECEPTOR-LIKE CYTOPLASMIC KINASE 62),Os04g0401000(PYRICULARIA ORYZAE RESISTANCE 21)	Os06g0726100(CHITINASE 3),Os07g0131375
BP	GO:0022622	root system development	1	1	2	133	0.3588	0.799421	Os03g0100020(TETRASPANIN 4)	Os06g0708400(CYCLOPHILIN 19-4)
BP	GO:0048364	root development	1	1	2	133	0.3588	0.799421	Os03g0100020(TETRASPANIN 4)	Os06g0708400(CYCLOPHILIN 19-4)
BP	GO:0009553	embryo sac development	1	0	1	47	0.3605	0.801127	Os03g0100020(TETRASPANIN 4)	-
BP	GO:0006950	response to stress	9	13	22	2129	0.3618	0.801127	Os01g0136100(16.9 KDA CLASS I HEAT SHOCK PROTEIN 1),Os01g0952800(basic helix-loop-helix protein 056),Os02g0156000(RECEPTOR-LIKE CYTOPLASMIC KINASE 62),Os02g0240300(class III peroxidase 29),Os04g0401000(PYRICULARIA ORYZAE RESISTANCE 21),Os07g0117300,Os07g0255200,Os08g0170700,Os11g0621825	Os02g0570400(ENT-KAURENE SYNTHASE 7),Os02g0621300("ECERIFERUM 1),Os03g0235000(PEROXIDASE N),Os03g0300400(JASMONATE INDUCIBLE PATHOGENESIS-RELATED CLASS 10 PROTEIN),Os04g0498900,Os04g0688500(class III peroxidase 62),Os06g0726100(CHITINASE 3),Os07g0131375,Os09g0110300(cyclase-like 4),Os10g0109600(PEROXIDASE A),Os11g0112200(class III peroxidase 131),Os11g0598500,Os12g0491800(KAURENE SYNTHASE-LIKE 10)
BP	GO:0008033	tRNA processing	0	2	2	134	0.3622	0.801127	-	CAA34008,Os10g0442400
MF	GO:0003993	acid phosphatase activity	1	0	1	44	0.36321	0.801127	Os01g0191200	-
MF	GO:0032182	ubiquitin-like protein binding	1	0	1	44	0.36321	0.801127	Os01g0806000	-
MF	GO:0033293	monocarboxylic acid binding	0	1	1	44	0.36321	0.801127	-	Os03g0300400(JASMONATE INDUCIBLE PATHOGENESIS-RELATED CLASS 10 PROTEIN)
BP	GO:0009070	serine family amino acid biosynthetic process	1	0	1	48	0.3665	0.801681	Os09g0294000	-
BP	GO:0009404	toxin metabolic process	0	1	1	48	0.3665	0.801681	-	Os01g0558100(TAU GLUTATHIONE S-TRANSFERASE 6)
BP	GO:0009723	response to ethylene	1	0	1	48	0.3665	0.801681	Os01g0952800(basic helix-loop-helix protein 056)	-
BP	GO:0015994	chlorophyll metabolic process	1	0	1	48	0.3665	0.801681	Os05g0408900(1-DEOXY-D-XYLULOSE 5-PHOSPHATE SYNTHASE 1)	-
BP	GO:0035194	posttranscriptional gene silencing by RNA	0	1	1	48	0.3665	0.801681	-	Os08g0148600
BP	GO:0010817	regulation of hormone levels	0	2	2	137	0.3723	0.812112	-	Os07g0519600,Os09g0344500("O-methyltransferase ZRP4)
BP	GO:0009067	aspartate family amino acid biosynthetic process	1	0	1	49	0.3725	0.812112	Os09g0294000	-
MF	GO:0015291	secondary active transmembrane transporter activity	1	4	5	394	0.37437	0.814842	Os10g0111700	Os03g0128932,Os03g0197200,Os11g0124500,Os11g0637100
MF	GO:0043621	protein self-association	1	0	1	46	0.37616	0.817389	Os01g0136100(16.9 KDA CLASS I HEAT SHOCK PROTEIN 1)	-
MF	GO:0008234	cysteine-type peptidase activity	3	0	3	216	0.37834	0.818429	Os01g0613500,Os07g0108100,Os07g0532500	-
BP	GO:0007623	circadian rhythm	1	0	1	50	0.3785	0.818429	Os08g0246800	-
BP	GO:0016128	phytosteroid metabolic process	0	1	1	50	0.3785	0.818429	-	Os07g0519600
MF	GO:0016301	kinase activity	11	11	22	1993	0.37952	0.819291	Os01g0669100(Large spike S-domain receptor like Kinase 1),Os01g0883000(RECEPTOR-LIKE CYTOPLASMIC KINASE 50),Os02g0142250,Os02g0156000(RECEPTOR-LIKE CYTOPLASMIC KINASE 62),Os03g0636800(NIMA-related kinase 1),Os05g0166300,Os05g0398800,Os07g0537500,Os08g0179000,Os08g0441100(CALCINEURIN B-LIKE PROTEIN-INTERACTING PROTEIN KINASE 6),Os09g0294000	Os01g0115600(RECEPTOR-LIKE CYTOPLASMIC KINASE 11),Os03g0262000,Os04g0369066(RECEPTOR-LIKE CYTOPLASMIC KINASE 144),Os04g0369100(RECEPTOR-LIKE CYTOPLASMIC KINASE 145),Os04g0608900(dual-specificity protein kinase 4),Os07g0131375,Os08g0230800(Lectin Receptor Kinase paralog),Os10g0442400,Os11g0514400,Os11g0548600(lysin motif-containing protein 2),Os11g0669200(RECEPTOR-LIKE CYTOPLASMIC KINASE 350)
BP	GO:0005976	polysaccharide metabolic process	2	3	5	429	0.3822	0.82149	Os07g0607400(PECTIN METHYLESTERASE 20),Os09g0530200(glycoside hydrolase OsGH9B14)	Os02g0247000,Os04g0640700,Os06g0726100(CHITINASE 3)
BP	GO:0051252	regulation of RNA metabolic process	11	12	23	2256	0.3825	0.82149	Os01g0566800(basic helix-loop-helix protein 117),Os01g0952800(basic helix-loop-helix protein 056),Os02g0671300(basic helix-loop-helix protein 076),Os03g0251350(HAP5C SUBUNIT OF CCAAT-BOX BINDING COMPLEX),Os06g0108500,Os06g0667200(MADS BOX GENE 30),Os08g0136100(RICE OUTMOST CELL-SPECIFIC GENE 7),Os08g0246800,Os08g0499300(WRKY GENE 30),Os08g0508700(ETHYLENE INSENSITIVE-LIKE GENE 4),Os10g0567900	Os01g0186000(WRKY GENE 10),Os01g0339500(NAC DOMAIN-CONTAINING PROTEIN 30),Os01g0676900,Os02g0564700(basic helix-loop-helix protein 097),Os02g0713700,Os03g0109000(NAC DOMAIN-CONTAINING PROTEIN 55),Os03g0771100,Os04g0678400(DNA BINDING WITH ONE FINGER 17),Os05g0390800(VQ motif-containing protein 19),Os05g0549800(APETALA2/ETHYLENE-RESPONSIVE ELEMENT BINDING PROTEIN 96),Os07g0628500("basic Helix-Loop…
MF	GO:0004252	serine-type endopeptidase activity	2	0	2	130	0.38303	0.82149	Os01g0727840("Subtilisin 3),Os01g0806000	-
MF	GO:0004540	ribonuclease activity	0	2	2	130	0.38303	0.82149	-	Os08g0148600,Os09g0538000(RIBONUCLEASE 5)
MF	GO:0048037	cofactor binding	4	3	7	583	0.3843	0.822876	Os04g0223500,Os05g0555600(NADH-DEPENDENT GLUTAMATE SYNTHASE 2),Os09g0294000,Os10g0475100	Os02g0811800(CINNAMOYL-COA REDUCTASE 10),Os06g0486900("FDH2),Os09g0127300
CC	GO:0005764	lysosome	1	0	1	56	0.3857	0.824535	Os01g0613500	-
BP	GO:1901362	organic cyclic compound biosynthetic process	14	16	30	2986	0.3882	0.828239	Os01g0566800(basic helix-loop-helix protein 117),Os01g0952800(basic helix-loop-helix protein 056),Os02g0258900,Os02g0671300(basic helix-loop-helix protein 076),Os03g0251350(HAP5C SUBUNIT OF CCAAT-BOX BINDING COMPLEX),Os04g0483450,Os05g0408900(1-DEOXY-D-XYLULOSE 5-PHOSPHATE SYNTHASE 1),Os06g0108500,Os06g0667200(MADS BOX GENE 30),Os08g0136100(RICE OUTMOST CELL-SPECIFIC GENE 7),Os08g0246800,Os08g049…	Os01g0186000(WRKY GENE 10),Os01g0339500(NAC DOMAIN-CONTAINING PROTEIN 30),Os01g0676900,Os02g0564700(basic helix-loop-helix protein 097),Os02g0713700,Os02g0811800(CINNAMOYL-COA REDUCTASE 10),Os03g0109000(NAC DOMAIN-CONTAINING PROTEIN 55),Os03g0771100,Os04g0678400(DNA BINDING WITH ONE FINGER 17),Os05g0390800(VQ motif-containing protein 19),Os05g0549800(APETALA2/ETHYLENE-RESPONSIVE ELEMENT BINDING P…
BP	GO:0016458	gene silencing	1	1	2	142	0.3892	0.828239	Os03g0798300(METHYLTRANSFERASE 1A)	Os08g0148600
BP	GO:0009251	glucan catabolic process	1	0	1	52	0.3902	0.828239	Os09g0530200(glycoside hydrolase OsGH9B14)	-
BP	GO:0010015	root morphogenesis	1	0	1	52	0.3902	0.828239	Os03g0100020(TETRASPANIN 4)	-
CC	GO:0005643	nuclear pore	1	0	1	57	0.391	0.828239	Os12g0236100	-
BP	GO:0010468	regulation of gene expression	13	13	26	2576	0.3912	0.828239	Os01g0566800(basic helix-loop-helix protein 117),Os01g0952800(basic helix-loop-helix protein 056),Os02g0611500,Os02g0671300(basic helix-loop-helix protein 076),Os03g0251350(HAP5C SUBUNIT OF CCAAT-BOX BINDING COMPLEX),Os03g0798300(METHYLTRANSFERASE 1A),Os06g0108500,Os06g0667200(MADS BOX GENE 30),Os08g0136100(RICE OUTMOST CELL-SPECIFIC GENE 7),Os08g0246800,Os08g0499300(WRKY GENE 30),Os08g0508700(ET…	Os01g0186000(WRKY GENE 10),Os01g0339500(NAC DOMAIN-CONTAINING PROTEIN 30),Os01g0676900,Os02g0564700(basic helix-loop-helix protein 097),Os02g0713700,Os03g0109000(NAC DOMAIN-CONTAINING PROTEIN 55),Os03g0771100,Os04g0678400(DNA BINDING WITH ONE FINGER 17),Os05g0390800(VQ motif-containing protein 19),Os05g0549800(APETALA2/ETHYLENE-RESPONSIVE ELEMENT BINDING PROTEIN 96),Os07g0628500("basic Helix-Loop…
BP	GO:0016310	phosphorylation	11	11	22	2168	0.3954	0.832356	Os01g0669100(Large spike S-domain receptor like Kinase 1),Os01g0883000(RECEPTOR-LIKE CYTOPLASMIC KINASE 50),Os02g0142250,Os02g0156000(RECEPTOR-LIKE CYTOPLASMIC KINASE 62),Os03g0636800(NIMA-related kinase 1),Os05g0166300,Os05g0398800,Os07g0537500,Os08g0179000,Os08g0441100(CALCINEURIN B-LIKE PROTEIN-INTERACTING PROTEIN KINASE 6),Os09g0294000	Os01g0115600(RECEPTOR-LIKE CYTOPLASMIC KINASE 11),Os03g0262000,Os04g0369066(RECEPTOR-LIKE CYTOPLASMIC KINASE 144),Os04g0369100(RECEPTOR-LIKE CYTOPLASMIC KINASE 145),Os04g0608900(dual-specificity protein kinase 4),Os07g0131375,Os08g0230800(Lectin Receptor Kinase paralog),Os10g0442400,Os11g0514400,Os11g0548600(lysin motif-containing protein 2),Os11g0669200(RECEPTOR-LIKE CYTOPLASMIC KINASE 350)
BP	GO:0042026	protein refolding	0	1	1	53	0.396	0.832356	-	Os06g0708400(CYCLOPHILIN 19-4)
BP	GO:0048511	rhythmic process	1	0	1	53	0.396	0.832356	Os08g0246800	-
BP	GO:0055088	lipid homeostasis	0	1	1	53	0.396	0.832356	-	Os07g0519600
CC	GO:0000145	exocyst	0	1	1	58	0.3963	0.832356	-	Os02g0575900(EXOCYST SUBUNIT EXO70 FAMILY PROTEIN FX6)
MF	GO:0045330	aspartyl esterase activity	1	0	1	50	0.40127	0.838358	Os07g0607400(PECTIN METHYLESTERASE 20)	-
CC	GO:0000323	lytic vacuole	1	0	1	59	0.4016	0.838358	Os01g0613500	-
BP	GO:0016441	posttranscriptional gene silencing	0	1	1	54	0.4017	0.838358	-	Os08g0148600
BP	GO:0070972	protein localization to endoplasmic reticulum	0	1	1	54	0.4017	0.838358	-	Os05g0509500
BP	GO:0019439	aromatic compound catabolic process	0	3	3	243	0.4041	0.839626	-	Os09g0110300(cyclase-like 4),Os09g0538000(RIBONUCLEASE 5),Os11g0245100(ZETA GLUTATHIONE S-TRANSFERASE 4)
BP	GO:0042221	response to chemical	5	10	15	1458	0.4054	0.839626	Os01g0136100(16.9 KDA CLASS I HEAT SHOCK PROTEIN 1),Os01g0952800(basic helix-loop-helix protein 056),Os02g0240300(class III peroxidase 29),Os02g0649900(YELLOW STRIP-LIKE GENE 2),Os05g0555600(NADH-DEPENDENT GLUTAMATE SYNTHASE 2)	Os01g0558100(TAU GLUTATHIONE S-TRANSFERASE 6),Os02g0621300("ECERIFERUM 1),Os03g0235000(PEROXIDASE N),Os03g0300400(JASMONATE INDUCIBLE PATHOGENESIS-RELATED CLASS 10 PROTEIN),Os04g0688500(class III peroxidase 62),Os07g0519600,Os08g0148600,Os09g0110300(cyclase-like 4),Os10g0109600(PEROXIDASE A),Os11g0112200(class III peroxidase 131)
MF	GO:0008378	galactosyltransferase activity	0	1	1	51	0.40739	0.839626	-	Os04g0506800(STLP3)
BP	GO:0003002	regionalization	1	0	1	55	0.4074	0.839626	Os03g0100020(TETRASPANIN 4)	-
BP	GO:0010563	negative regulation of phosphorus metabolic process	0	1	1	55	0.4074	0.839626	-	Os03g0300400(JASMONATE INDUCIBLE PATHOGENESIS-RELATED CLASS 10 PROTEIN)
BP	GO:0044247	cellular polysaccharide catabolic process	1	0	1	55	0.4074	0.839626	Os09g0530200(glycoside hydrolase OsGH9B14)	-
BP	GO:0045490	pectin catabolic process	1	0	1	55	0.4074	0.839626	Os07g0607400(PECTIN METHYLESTERASE 20)	-
BP	GO:0045936	negative regulation of phosphate metabolic process	0	1	1	55	0.4074	0.839626	-	Os03g0300400(JASMONATE INDUCIBLE PATHOGENESIS-RELATED CLASS 10 PROTEIN)
BP	GO:0009699	phenylpropanoid biosynthetic process	0	1	1	56	0.413	0.84825	-	Os02g0811800(CINNAMOYL-COA REDUCTASE 10)
BP	GO:0031400	negative regulation of protein modification process	0	1	1	56	0.413	0.84825	-	Os03g0300400(JASMONATE INDUCIBLE PATHOGENESIS-RELATED CLASS 10 PROTEIN)
BP	GO:0009416	response to light stimulus	4	0	4	346	0.4141	0.84825	Os01g0600900(CHLOROPHYLL A/B BINDING PROTEIN 2R),Os03g0251350(HAP5C SUBUNIT OF CCAAT-BOX BINDING COMPLEX),Os04g0457000("light-harvesting protein CP24),Os08g0246800	-
MF	GO:0004888	transmembrane signaling receptor activity	3	1	4	321	0.41429	0.84825	Os02g0156000(RECEPTOR-LIKE CYTOPLASMIC KINASE 62),Os05g0398800,Os06g0188400(Glutamate receptor homolog 4.1)	Os07g0131375
BP	GO:0018130	heterocycle biosynthetic process	14	14	28	2813	0.4148	0.84825	Os01g0566800(basic helix-loop-helix protein 117),Os01g0952800(basic helix-loop-helix protein 056),Os02g0258900,Os02g0671300(basic helix-loop-helix protein 076),Os03g0251350(HAP5C SUBUNIT OF CCAAT-BOX BINDING COMPLEX),Os04g0483450,Os05g0408900(1-DEOXY-D-XYLULOSE 5-PHOSPHATE SYNTHASE 1),Os06g0108500,Os06g0667200(MADS BOX GENE 30),Os08g0136100(RICE OUTMOST CELL-SPECIFIC GENE 7),Os08g0246800,Os08g049…	Os01g0186000(WRKY GENE 10),Os01g0339500(NAC DOMAIN-CONTAINING PROTEIN 30),Os01g0676900,Os02g0564700(basic helix-loop-helix protein 097),Os02g0713700,Os03g0109000(NAC DOMAIN-CONTAINING PROTEIN 55),Os03g0771100,Os04g0678400(DNA BINDING WITH ONE FINGER 17),Os05g0390800(VQ motif-containing protein 19),Os05g0549800(APETALA2/ETHYLENE-RESPONSIVE ELEMENT BINDING PROTEIN 96),Os07g0628500("basic Helix-Loop…
MF	GO:0008757	S-adenosylmethionine-dependent methyltransferase activity	1	2	3	230	0.41672	0.850857	Os03g0798300(METHYLTRANSFERASE 1A)	Os09g0344500("O-methyltransferase ZRP4),Os10g0442400
BP	GO:0022603	regulation of anatomical structure morphogenesis	1	0	1	57	0.4186	0.85109	Os03g0100020(TETRASPANIN 4)	-
BP	GO:0042537	benzene-containing compound metabolic process	0	1	1	57	0.4186	0.85109	-	Os09g0110300(cyclase-like 4)
MF	GO:0060089	molecular transducer activity	3	2	5	416	0.41877	0.85109	Os02g0156000(RECEPTOR-LIKE CYTOPLASMIC KINASE 62),Os05g0398800,Os06g0188400(Glutamate receptor homolog 4.1)	Os03g0300400(JASMONATE INDUCIBLE PATHOGENESIS-RELATED CLASS 10 PROTEIN),Os07g0131375
MF	GO:0016829	lyase activity	0	5	5	417	0.42078	0.852292	-	Os02g0570400(ENT-KAURENE SYNTHASE 7),Os02g0621300("ECERIFERUM 1),Os03g0347900,Os03g0348200(terpene synthase 10),Os12g0491800(KAURENE SYNTHASE-LIKE 10)
MF	GO:0099600	transmembrane receptor activity	3	1	4	324	0.42115	0.852292	Os02g0156000(RECEPTOR-LIKE CYTOPLASMIC KINASE 62),Os05g0398800,Os06g0188400(Glutamate receptor homolog 4.1)	Os07g0131375
CC	GO:0005774	vacuolar membrane	2	1	3	273	0.4213	0.852292	Os01g0232000(TONOPLAST INTRINSIC PROTEIN 4;3),Os06g0561800(MULTIDRUG RESISTANCE-ASSOCIATED PROTEIN 11)	Os01g0902100(MULTIDRUG RESISTANCE-ASSOCIATED PROTEIN 2)
BP	GO:0009664	plant-type cell wall organization	1	1	2	152	0.4222	0.852805	Os09g0530200(glycoside hydrolase OsGH9B14)	Os04g0688500(class III peroxidase 62)
CC	GO:0044437	vacuolar part	2	1	3	274	0.4236	0.852833	Os01g0232000(TONOPLAST INTRINSIC PROTEIN 4;3),Os06g0561800(MULTIDRUG RESISTANCE-ASSOCIATED PROTEIN 11)	Os01g0902100(MULTIDRUG RESISTANCE-ASSOCIATED PROTEIN 2)
BP	GO:0072350	tricarboxylic acid metabolic process	0	1	1	58	0.4241	0.852833	-	Os07g0689600(NICOTIANAMINE SYNTHASE 3)
BP	GO:1901361	organic cyclic compound catabolic process	0	3	3	251	0.4243	0.852833	-	Os09g0110300(cyclase-like 4),Os09g0538000(RIBONUCLEASE 5),Os11g0245100(ZETA GLUTATHIONE S-TRANSFERASE 4)
CC	GO:0009505	plant-type cell wall	0	2	2	167	0.4248	0.852833	-	Os04g0640700,Os04g0688500(class III peroxidase 62)
CC	GO:0030176	integral component of endoplasmic reticulum membrane	1	0	1	64	0.4271	0.85531	Os02g0142250	-
BP	GO:0006351	transcription, DNA-templated	11	12	23	2309	0.4278	0.85531	Os01g0566800(basic helix-loop-helix protein 117),Os01g0952800(basic helix-loop-helix protein 056),Os02g0671300(basic helix-loop-helix protein 076),Os03g0251350(HAP5C SUBUNIT OF CCAAT-BOX BINDING COMPLEX),Os06g0108500,Os06g0667200(MADS BOX GENE 30),Os08g0136100(RICE OUTMOST CELL-SPECIFIC GENE 7),Os08g0246800,Os08g0499300(WRKY GENE 30),Os08g0508700(ETHYLENE INSENSITIVE-LIKE GENE 4),Os10g0567900	Os01g0186000(WRKY GENE 10),Os01g0339500(NAC DOMAIN-CONTAINING PROTEIN 30),Os01g0676900,Os02g0564700(basic helix-loop-helix protein 097),Os02g0713700,Os03g0109000(NAC DOMAIN-CONTAINING PROTEIN 55),Os03g0771100,Os04g0678400(DNA BINDING WITH ONE FINGER 17),Os05g0390800(VQ motif-containing protein 19),Os05g0549800(APETALA2/ETHYLENE-RESPONSIVE ELEMENT BINDING PROTEIN 96),Os07g0628500("basic Helix-Loop…
BP	GO:0048573	photoperiodism, flowering	1	0	1	59	0.4296	0.85531	Os03g0251350(HAP5C SUBUNIT OF CCAAT-BOX BINDING COMPLEX)	-
MF	GO:0046914	transition metal ion binding	9	8	17	1567	0.43117	0.85531	Os01g0755700,Os03g0861400,Os04g0401000(PYRICULARIA ORYZAE RESISTANCE 21),Os05g0296200,Os05g0305200,Os05g0555600(NADH-DEPENDENT GLUTAMATE SYNTHASE 2),Os08g0246800,Os10g0486300,Os12g0582700	Os02g0621300("ECERIFERUM 1),Os04g0400000,Os05g0424300,Os06g0501900(P-450 76M9),Os07g0519600,Os07g0588100,Os09g0264400,Os09g0275400
BP	GO:0000070	mitotic sister chromatid segregation	0	1	1	60	0.435	0.85531	-	Os04g0498900
BP	GO:0009808	lignin metabolic process	0	1	1	60	0.435	0.85531	-	Os02g0811800(CINNAMOYL-COA REDUCTASE 10)
BP	GO:0042364	water-soluble vitamin biosynthetic process	1	0	1	60	0.435	0.85531	Os05g0408900(1-DEOXY-D-XYLULOSE 5-PHOSPHATE SYNTHASE 1)	-
BP	GO:0046323	glucose import	0	1	1	60	0.435	0.85531	-	Os03g0197200
MF	GO:0004190	aspartic-type endopeptidase activity	2	0	2	145	0.43623	0.85531	Os07g0533300,Os12g0583300	-
MF	GO:0070001	aspartic-type peptidase activity	2	0	2	145	0.43623	0.85531	Os07g0533300,Os12g0583300	-
BP	GO:0097659	nucleic acid-templated transcription	11	12	23	2319	0.4364	0.85531	Os01g0566800(basic helix-loop-helix protein 117),Os01g0952800(basic helix-loop-helix protein 056),Os02g0671300(basic helix-loop-helix protein 076),Os03g0251350(HAP5C SUBUNIT OF CCAAT-BOX BINDING COMPLEX),Os06g0108500,Os06g0667200(MADS BOX GENE 30),Os08g0136100(RICE OUTMOST CELL-SPECIFIC GENE 7),Os08g0246800,Os08g0499300(WRKY GENE 30),Os08g0508700(ETHYLENE INSENSITIVE-LIKE GENE 4),Os10g0567900	Os01g0186000(WRKY GENE 10),Os01g0339500(NAC DOMAIN-CONTAINING PROTEIN 30),Os01g0676900,Os02g0564700(basic helix-loop-helix protein 097),Os02g0713700,Os03g0109000(NAC DOMAIN-CONTAINING PROTEIN 55),Os03g0771100,Os04g0678400(DNA BINDING WITH ONE FINGER 17),Os05g0390800(VQ motif-containing protein 19),Os05g0549800(APETALA2/ETHYLENE-RESPONSIVE ELEMENT BINDING PROTEIN 96),Os07g0628500("basic Helix-Loop…
CC	GO:0031227	intrinsic component of endoplasmic reticulum membrane	1	0	1	66	0.437	0.85531	Os02g0142250	-
MF	GO:0003964	RNA-directed DNA polymerase activity	1	0	1	56	0.43706	0.85531	Os04g0483450	-
MF	GO:0070011	peptidase activity, acting on L-amino acid peptides	8	0	8	710	0.43742	0.85531	Os01g0613500,Os01g0727840("Subtilisin 3),Os01g0806000,Os07g0108100,Os07g0532500,Os07g0533300,Os11g0461000(SERINE CARBOXYPEPTIDASE 61),Os12g0583300	-
BP	GO:0032774	RNA biosynthetic process	11	12	23	2322	0.439	0.85531	Os01g0566800(basic helix-loop-helix protein 117),Os01g0952800(basic helix-loop-helix protein 056),Os02g0671300(basic helix-loop-helix protein 076),Os03g0251350(HAP5C SUBUNIT OF CCAAT-BOX BINDING COMPLEX),Os06g0108500,Os06g0667200(MADS BOX GENE 30),Os08g0136100(RICE OUTMOST CELL-SPECIFIC GENE 7),Os08g0246800,Os08g0499300(WRKY GENE 30),Os08g0508700(ETHYLENE INSENSITIVE-LIKE GENE 4),Os10g0567900	Os01g0186000(WRKY GENE 10),Os01g0339500(NAC DOMAIN-CONTAINING PROTEIN 30),Os01g0676900,Os02g0564700(basic helix-loop-helix protein 097),Os02g0713700,Os03g0109000(NAC DOMAIN-CONTAINING PROTEIN 55),Os03g0771100,Os04g0678400(DNA BINDING WITH ONE FINGER 17),Os05g0390800(VQ motif-containing protein 19),Os05g0549800(APETALA2/ETHYLENE-RESPONSIVE ELEMENT BINDING PROTEIN 96),Os07g0628500("basic Helix-Loop…
BP	GO:0044255	cellular lipid metabolic process	2	5	7	664	0.4391	0.85531	Os02g0142250,Os05g0408900(1-DEOXY-D-XYLULOSE 5-PHOSPHATE SYNTHASE 1)	Os02g0570400(ENT-KAURENE SYNTHASE 7),Os02g0621300("ECERIFERUM 1),Os03g0262000,Os06g0501900(P-450 76M9),Os12g0491800(KAURENE SYNTHASE-LIKE 10)
BP	GO:0009066	aspartate family amino acid metabolic process	1	0	1	61	0.4403	0.85531	Os09g0294000	-
BP	GO:0009069	serine family amino acid metabolic process	1	0	1	61	0.4403	0.85531	Os09g0294000	-
BP	GO:0035304	regulation of protein dephosphorylation	0	1	1	61	0.4403	0.85531	-	Os03g0300400(JASMONATE INDUCIBLE PATHOGENESIS-RELATED CLASS 10 PROTEIN)
BP	GO:0043666	regulation of phosphoprotein phosphatase activity	0	1	1	61	0.4403	0.85531	-	Os03g0300400(JASMONATE INDUCIBLE PATHOGENESIS-RELATED CLASS 10 PROTEIN)
BP	GO:0071482	cellular response to light stimulus	1	0	1	61	0.4403	0.85531	Os08g0246800	-
BP	GO:0072528	pyrimidine-containing compound biosynthetic process	1	0	1	61	0.4403	0.85531	Os05g0408900(1-DEOXY-D-XYLULOSE 5-PHOSPHATE SYNTHASE 1)	-
BP	GO:0044248	cellular catabolic process	5	11	16	1597	0.4423	0.856773	Os01g0122000("OsPR5),Os01g0613500,Os01g0755700,Os02g0240300(class III peroxidase 29),Os09g0530200(glycoside hydrolase OsGH9B14)	Os01g0558100(TAU GLUTATHIONE S-TRANSFERASE 6),Os04g0688500(class III peroxidase 62),Os06g0486900("FDH2),Os06g0726100(CHITINASE 3),Os09g0110300(cyclase-like 4),Os09g0538000(RIBONUCLEASE 5),Os10g0109600(PEROXIDASE A),Os10g0543400,Os11g0112200(class III peroxidase 131),Os11g0245100(ZETA GLUTATHIONE S-TRANSFERASE 4),Os12g0595600
MF	GO:0022804	active transmembrane transporter activity	2	5	7	618	0.4427	0.856773	Os06g0561800(MULTIDRUG RESISTANCE-ASSOCIATED PROTEIN 11),Os10g0111700	Os01g0902100(MULTIDRUG RESISTANCE-ASSOCIATED PROTEIN 2),Os03g0128932,Os03g0197200,Os11g0124500,Os11g0637100
MF	GO:0008509	anion transmembrane transporter activity	2	1	3	240	0.44368	0.856773	Os05g0269200,Os12g0194900("amino acid permease 10B)	Os07g0519600
BP	GO:0006778	porphyrin-containing compound metabolic process	1	0	1	62	0.4456	0.856773	Os05g0408900(1-DEOXY-D-XYLULOSE 5-PHOSPHATE SYNTHASE 1)	-
BP	GO:0010501	RNA secondary structure unwinding	1	0	1	62	0.4456	0.856773	Os06g0602400(RNA helicase 52A)	-
BP	GO:0042594	response to starvation	1	0	1	62	0.4456	0.856773	Os01g0952800(basic helix-loop-helix protein 056)	-
BP	GO:0048609	multicellular organismal reproductive process	1	0	1	62	0.4456	0.856773	Os09g0530200(glycoside hydrolase OsGH9B14)	-
MF	GO:0003824	catalytic activity	57	60	117	11342	0.45073	0.86069	Os01g0122000("OsPR5),Os01g0191200,Os01g0197450,Os01g0613500,Os01g0669100(Large spike S-domain receptor like Kinase 1),Os01g0715900,Os01g0727840("Subtilisin 3),Os01g0755700,Os01g0806000,Os01g0883000(RECEPTOR-LIKE CYTOPLASMIC KINASE 50),Os02g0142250,Os02g0156000(RECEPTOR-LIKE CYTOPLASMIC KINASE 62),Os02g0240300(class III peroxidase 29),Os02g0258900,Os02g0734400,Os03g0115700,Os03g0636800(NIMA-relate…	Os01g0115600(RECEPTOR-LIKE CYTOPLASMIC KINASE 11),Os01g0558100(TAU GLUTATHIONE S-TRANSFERASE 6),Os01g0832600,Os01g0902100(MULTIDRUG RESISTANCE-ASSOCIATED PROTEIN 2),Os01g0940800("beta-1),Os02g0247000,Os02g0570400(ENT-KAURENE SYNTHASE 7),Os02g0607500("protein phosphatase 2C22),Os02g0621300("ECERIFERUM 1),Os02g0811800(CINNAMOYL-COA REDUCTASE 10),Os03g0235000(PEROXIDASE N),Os03g0262000,Os03g0347900,…
BP	GO:0006665	sphingolipid metabolic process	0	1	1	63	0.4509	0.86069	-	Os02g0621300("ECERIFERUM 1)
BP	GO:0009648	photoperiodism	1	0	1	63	0.4509	0.86069	Os03g0251350(HAP5C SUBUNIT OF CCAAT-BOX BINDING COMPLEX)	-
BP	GO:0033013	tetrapyrrole metabolic process	1	0	1	63	0.4509	0.86069	Os05g0408900(1-DEOXY-D-XYLULOSE 5-PHOSPHATE SYNTHASE 1)	-
BP	GO:0045491	xylan metabolic process	0	1	1	63	0.4509	0.86069	-	Os04g0640700
MF	GO:0004185	serine-type carboxypeptidase activity	1	0	1	59	0.45415	0.861599	Os11g0461000(SERINE CARBOXYPEPTIDASE 61)	-
BP	GO:0010921	regulation of phosphatase activity	0	1	1	64	0.4561	0.861599	-	Os03g0300400(JASMONATE INDUCIBLE PATHOGENESIS-RELATED CLASS 10 PROTEIN)
BP	GO:0019953	sexual reproduction	1	0	1	64	0.4561	0.861599	Os03g0100020(TETRASPANIN 4)	-
BP	GO:0032504	multicellular organism reproduction	1	0	1	64	0.4561	0.861599	Os09g0530200(glycoside hydrolase OsGH9B14)	-
CC	GO:0090575	RNA polymerase II transcription factor complex	1	0	1	70	0.4563	0.861599	Os01g0952800(basic helix-loop-helix protein 056)	-
CC	GO:0009506	plasmodesma	2	2	4	401	0.4582	0.861599	Os03g0100020(TETRASPANIN 4),Os03g0751100("Oligopeptide Transporter)	Os04g0688500(class III peroxidase 62),Os06g0708400(CYCLOPHILIN 19-4)
CC	GO:0055044	symplast	2	2	4	401	0.4582	0.861599	Os03g0100020(TETRASPANIN 4),Os03g0751100("Oligopeptide Transporter)	Os04g0688500(class III peroxidase 62),Os06g0708400(CYCLOPHILIN 19-4)
MF	GO:0008171	O-methyltransferase activity	0	1	1	60	0.45973	0.861599	-	Os09g0344500("O-methyltransferase ZRP4)
CC	GO:0005911	cell-cell junction	2	2	4	402	0.4601	0.861599	Os03g0100020(TETRASPANIN 4),Os03g0751100("Oligopeptide Transporter)	Os04g0688500(class III peroxidase 62),Os06g0708400(CYCLOPHILIN 19-4)
CC	GO:0030054	cell junction	2	2	4	402	0.4601	0.861599	Os03g0100020(TETRASPANIN 4),Os03g0751100("Oligopeptide Transporter)	Os04g0688500(class III peroxidase 62),Os06g0708400(CYCLOPHILIN 19-4)
BP	GO:0009314	response to radiation	4	0	4	368	0.4604	0.861599	Os01g0600900(CHLOROPHYLL A/B BINDING PROTEIN 2R),Os03g0251350(HAP5C SUBUNIT OF CCAAT-BOX BINDING COMPLEX),Os04g0457000("light-harvesting protein CP24),Os08g0246800	-
BP	GO:0000413	protein peptidyl-prolyl isomerization	0	1	1	65	0.4613	0.861599	-	Os06g0708400(CYCLOPHILIN 19-4)
BP	GO:0035303	regulation of dephosphorylation	0	1	1	65	0.4613	0.861599	-	Os03g0300400(JASMONATE INDUCIBLE PATHOGENESIS-RELATED CLASS 10 PROTEIN)
BP	GO:0006468	protein phosphorylation	9	8	17	1722	0.4632	0.861599	Os01g0669100(Large spike S-domain receptor like Kinase 1),Os01g0883000(RECEPTOR-LIKE CYTOPLASMIC KINASE 50),Os02g0156000(RECEPTOR-LIKE CYTOPLASMIC KINASE 62),Os03g0636800(NIMA-related kinase 1),Os05g0166300,Os05g0398800,Os07g0537500,Os08g0179000,Os08g0441100(CALCINEURIN B-LIKE PROTEIN-INTERACTING PROTEIN KINASE 6)	Os01g0115600(RECEPTOR-LIKE CYTOPLASMIC KINASE 11),Os04g0369066(RECEPTOR-LIKE CYTOPLASMIC KINASE 144),Os04g0369100(RECEPTOR-LIKE CYTOPLASMIC KINASE 145),Os04g0608900(dual-specificity protein kinase 4),Os07g0131375,Os08g0230800(Lectin Receptor Kinase paralog),Os11g0548600(lysin motif-containing protein 2),Os11g0669200(RECEPTOR-LIKE CYTOPLASMIC KINASE 350)
MF	GO:0005244	voltage-gated ion channel activity	1	0	1	61	0.46526	0.861599	Os05g0269200	-
MF	GO:0015103	inorganic anion transmembrane transporter activity	0	1	1	61	0.46526	0.861599	-	Os07g0519600
MF	GO:0019888	protein phosphatase regulator activity	0	1	1	61	0.46526	0.861599	-	Os03g0300400(JASMONATE INDUCIBLE PATHOGENESIS-RELATED CLASS 10 PROTEIN)
MF	GO:0022832	voltage-gated channel activity	1	0	1	61	0.46526	0.861599	Os05g0269200	-
CC	GO:0044448	cell cortex part	0	1	1	72	0.4657	0.861599	-	Os02g0575900(EXOCYST SUBUNIT EXO70 FAMILY PROTEIN FX6)
BP	GO:0007389	pattern specification process	1	0	1	66	0.4664	0.861599	Os03g0100020(TETRASPANIN 4)	-
BP	GO:0012501	programmed cell death	0	1	1	66	0.4664	0.861599	-	Os11g0598500
BP	GO:0044703	multi-organism reproductive process	1	0	1	66	0.4664	0.861599	Os03g0100020(TETRASPANIN 4)	-
BP	GO:0009266	response to temperature stimulus	1	2	3	268	0.4664	0.861599	Os01g0136100(16.9 KDA CLASS I HEAT SHOCK PROTEIN 1)	Os02g0621300("ECERIFERUM 1),Os09g0110300(cyclase-like 4)
CC	GO:0009570	chloroplast stroma	4	0	4	407	0.4696	0.864753	Os01g0600900(CHLOROPHYLL A/B BINDING PROTEIN 2R),Os04g0457000("light-harvesting protein CP24),Os05g0408900(1-DEOXY-D-XYLULOSE 5-PHOSPHATE SYNTHASE 1),Os09g0294000	-
MF	GO:0016773	phosphotransferase activity, alcohol group as acceptor	10	9	19	1798	0.47	0.864753	Os01g0669100(Large spike S-domain receptor like Kinase 1),Os01g0883000(RECEPTOR-LIKE CYTOPLASMIC KINASE 50),Os02g0142250,Os02g0156000(RECEPTOR-LIKE CYTOPLASMIC KINASE 62),Os03g0636800(NIMA-related kinase 1),Os05g0166300,Os05g0398800,Os07g0537500,Os08g0179000,Os08g0441100(CALCINEURIN B-LIKE PROTEIN-INTERACTING PROTEIN KINASE 6)	Os01g0115600(RECEPTOR-LIKE CYTOPLASMIC KINASE 11),Os03g0262000,Os04g0369066(RECEPTOR-LIKE CYTOPLASMIC KINASE 144),Os04g0369100(RECEPTOR-LIKE CYTOPLASMIC KINASE 145),Os04g0608900(dual-specificity protein kinase 4),Os07g0131375,Os08g0230800(Lectin Receptor Kinase paralog),Os11g0548600(lysin motif-containing protein 2),Os11g0669200(RECEPTOR-LIKE CYTOPLASMIC KINASE 350)
MF	GO:0019208	phosphatase regulator activity	0	1	1	62	0.47073	0.864753	-	Os03g0300400(JASMONATE INDUCIBLE PATHOGENESIS-RELATED CLASS 10 PROTEIN)
MF	GO:0030599	pectinesterase activity	1	0	1	62	0.47073	0.864753	Os07g0607400(PECTIN METHYLESTERASE 20)	-
BP	GO:0007275	multicellular organism development	7	3	10	998	0.4715	0.864963	Os01g0122000("OsPR5),Os02g0649900(YELLOW STRIP-LIKE GENE 2),Os03g0100020(TETRASPANIN 4),Os03g0251350(HAP5C SUBUNIT OF CCAAT-BOX BINDING COMPLEX),Os06g0108500,Os06g0667200(MADS BOX GENE 30),Os09g0530200(glycoside hydrolase OsGH9B14)	Os02g0713700,Os06g0708400(CYCLOPHILIN 19-4),Os07g0519600
MF	GO:0051082	unfolded protein binding	1	1	2	156	0.47364	0.867682	Os01g0136100(16.9 KDA CLASS I HEAT SHOCK PROTEIN 1)	Os06g0708400(CYCLOPHILIN 19-4)
BP	GO:0051173	positive regulation of nitrogen compound metabolic process	5	1	6	583	0.4749	0.868099	Os01g0952800(basic helix-loop-helix protein 056),Os02g0671300(basic helix-loop-helix protein 076),Os06g0108500,Os06g0667200(MADS BOX GENE 30),Os08g0246800	Os02g0564700(basic helix-loop-helix protein 097)
MF	GO:0008375	acetylglucosaminyltransferase activity	1	0	1	63	0.47614	0.868099	Os10g0516600(OsSTA247)	-
BP	GO:0071478	cellular response to radiation	1	0	1	68	0.4764	0.868099	Os08g0246800	-
BP	GO:0010604	positive regulation of macromolecule metabolic process	5	1	6	584	0.4765	0.868099	Os01g0952800(basic helix-loop-helix protein 056),Os02g0671300(basic helix-loop-helix protein 076),Os06g0108500,Os06g0667200(MADS BOX GENE 30),Os08g0246800	Os02g0564700(basic helix-loop-helix protein 097)
BP	GO:0006278	RNA-dependent DNA biosynthetic process	1	0	1	69	0.4814	0.871178	Os04g0483450	-
BP	GO:0009110	vitamin biosynthetic process	1	0	1	69	0.4814	0.871178	Os05g0408900(1-DEOXY-D-XYLULOSE 5-PHOSPHATE SYNTHASE 1)	-
BP	GO:0031325	positive regulation of cellular metabolic process	5	1	6	587	0.4815	0.871178	Os01g0952800(basic helix-loop-helix protein 056),Os02g0671300(basic helix-loop-helix protein 076),Os06g0108500,Os06g0667200(MADS BOX GENE 30),Os08g0246800	Os02g0564700(basic helix-loop-helix protein 097)
MF	GO:0070008	serine-type exopeptidase activity	1	0	1	64	0.4815	0.871178	Os11g0461000(SERINE CARBOXYPEPTIDASE 61)	-
BP	GO:0042742	defense response to bacterium	1	1	2	171	0.4823	0.871178	Os02g0156000(RECEPTOR-LIKE CYTOPLASMIC KINASE 62)	Os07g0131375
BP	GO:0009057	macromolecule catabolic process	7	6	13	1322	0.4832	0.871178	Os01g0122000("OsPR5),Os01g0613500,Os01g0755700,Os07g0533300,Os07g0607400(PECTIN METHYLESTERASE 20),Os09g0530200(glycoside hydrolase OsGH9B14),Os12g0583300	Os04g0640700,Os06g0726100(CHITINASE 3),Os09g0538000(RIBONUCLEASE 5),Os10g0543400,Os11g0701600,Os12g0595600
BP	GO:0000160	phosphorelay signal transduction system	1	0	1	70	0.4863	0.871178	Os01g0952800(basic helix-loop-helix protein 056)	-
BP	GO:0051052	regulation of DNA metabolic process	0	1	1	70	0.4863	0.871178	-	Os04g0498900
BP	GO:0051274	beta-glucan biosynthetic process	0	1	1	70	0.4863	0.871178	-	Os02g0247000
BP	GO:0072527	pyrimidine-containing compound metabolic process	1	0	1	70	0.4863	0.871178	Os05g0408900(1-DEOXY-D-XYLULOSE 5-PHOSPHATE SYNTHASE 1)	-
MF	GO:0003755	peptidyl-prolyl cis-trans isomerase activity	0	1	1	65	0.4868	0.871178	-	Os06g0708400(CYCLOPHILIN 19-4)
MF	GO:0008173	RNA methyltransferase activity	0	1	1	65	0.4868	0.871178	-	Os10g0442400
MF	GO:0016413	O-acetyltransferase activity	0	1	1	65	0.4868	0.871178	-	Os06g0273500("leaf senescence protein)
CC	GO:0009705	plant-type vacuole membrane	1	0	1	77	0.4885	0.871178	Os01g0232000(TONOPLAST INTRINSIC PROTEIN 4;3)	-
CC	GO:0009532	plastid stroma	4	0	4	418	0.4902	0.871178	Os01g0600900(CHLOROPHYLL A/B BINDING PROTEIN 2R),Os04g0457000("light-harvesting protein CP24),Os05g0408900(1-DEOXY-D-XYLULOSE 5-PHOSPHATE SYNTHASE 1),Os09g0294000	-
BP	GO:0006612	protein targeting to membrane	0	1	1	71	0.4912	0.871178	-	Os05g0509500
BP	GO:0006767	water-soluble vitamin metabolic process	1	0	1	71	0.4912	0.871178	Os05g0408900(1-DEOXY-D-XYLULOSE 5-PHOSPHATE SYNTHASE 1)	-
BP	GO:0046686	response to cadmium ion	1	0	1	71	0.4912	0.871178	Os01g0952800(basic helix-loop-helix protein 056)	-
BP	GO:0007166	cell surface receptor signaling pathway	3	2	5	488	0.4914	0.871178	Os02g0156000(RECEPTOR-LIKE CYTOPLASMIC KINASE 62),Os05g0398800,Os06g0188400(Glutamate receptor homolog 4.1)	Os07g0131375,Os11g0669200(RECEPTOR-LIKE CYTOPLASMIC KINASE 350)
BP	GO:1901607	alpha-amino acid biosynthetic process	2	0	2	174	0.4914	0.871178	Os05g0555600(NADH-DEPENDENT GLUTAMATE SYNTHASE 2),Os09g0294000	-
CC	GO:0005938	cell cortex	0	1	1	78	0.4929	0.871229	-	Os02g0575900(EXOCYST SUBUNIT EXO70 FAMILY PROTEIN FX6)
CC	GO:0099568	cytoplasmic region	0	1	1	78	0.4929	0.871229	-	Os02g0575900(EXOCYST SUBUNIT EXO70 FAMILY PROTEIN FX6)
MF	GO:0016407	acetyltransferase activity	0	2	2	162	0.49341	0.871229	-	Os04g0498900,Os06g0273500("leaf senescence protein)
MF	GO:0016866	intramolecular transferase activity	1	0	1	67	0.49724	0.875288	Os11g0285000("oxidosqualene cyclase 8)	-
BP	GO:0090501	RNA phosphodiester bond hydrolysis	0	2	2	176	0.4975	0.875288	-	Os08g0148600,Os09g0538000(RIBONUCLEASE 5)
BP	GO:0007154	cell communication	13	6	19	1968	0.4977	0.875288	Os01g0197450,Os01g0669100(Large spike S-domain receptor like Kinase 1),Os01g0952800(basic helix-loop-helix protein 056),Os02g0156000(RECEPTOR-LIKE CYTOPLASMIC KINASE 62),Os05g0166300,Os05g0398800,Os06g0188400(Glutamate receptor homolog 4.1),Os07g0117300,Os07g0532500,Os08g0170700,Os08g0179000,Os08g0246800,Os08g0441100(CALCINEURIN B-LIKE PROTEIN-INTERACTING PROTEIN KINASE 6)	Os03g0300400(JASMONATE INDUCIBLE PATHOGENESIS-RELATED CLASS 10 PROTEIN),Os04g0608900(dual-specificity protein kinase 4),Os07g0131375,Os08g0230800(Lectin Receptor Kinase paralog),Os11g0598500,Os11g0669200(RECEPTOR-LIKE CYTOPLASMIC KINASE 350)
BP	GO:0003006	developmental process involved in reproduction	4	1	5	492	0.4986	0.875704	Os02g0649900(YELLOW STRIP-LIKE GENE 2),Os03g0100020(TETRASPANIN 4),Os03g0251350(HAP5C SUBUNIT OF CCAAT-BOX BINDING COMPLEX),Os09g0530200(glycoside hydrolase OsGH9B14)	Os02g0713700
BP	GO:0071804	cellular potassium ion transport	0	1	1	73	0.5008	0.877231	-	Os08g0466200(HIGH-AFFINITY POTASSIUM(K+) TRANSPORTER 4)
BP	GO:0071805	potassium ion transmembrane transport	0	1	1	73	0.5008	0.877231	-	Os08g0466200(HIGH-AFFINITY POTASSIUM(K+) TRANSPORTER 4)
BP	GO:0006575	cellular modified amino acid metabolic process	0	2	2	178	0.5034	0.880616	-	Os01g0558100(TAU GLUTATHIONE S-TRANSFERASE 6),Os11g0245100(ZETA GLUTATHIONE S-TRANSFERASE 4)
BP	GO:0001510	RNA methylation	0	1	1	75	0.5103	0.889149	-	Os10g0442400
BP	GO:0009064	glutamine family amino acid metabolic process	1	0	1	75	0.5103	0.889149	Os05g0555600(NADH-DEPENDENT GLUTAMATE SYNTHASE 2)	-
BP	GO:0031667	response to nutrient levels	1	0	1	75	0.5103	0.889149	Os01g0952800(basic helix-loop-helix protein 056)	-
MF	GO:0015079	potassium ion transmembrane transporter activity	0	1	1	70	0.51251	0.891821	-	Os08g0466200(HIGH-AFFINITY POTASSIUM(K+) TRANSPORTER 4)
MF	GO:0004672	protein kinase activity	9	8	17	1645	0.5135	0.892367	Os01g0669100(Large spike S-domain receptor like Kinase 1),Os01g0883000(RECEPTOR-LIKE CYTOPLASMIC KINASE 50),Os02g0156000(RECEPTOR-LIKE CYTOPLASMIC KINASE 62),Os03g0636800(NIMA-related kinase 1),Os05g0166300,Os05g0398800,Os07g0537500,Os08g0179000,Os08g0441100(CALCINEURIN B-LIKE PROTEIN-INTERACTING PROTEIN KINASE 6)	Os01g0115600(RECEPTOR-LIKE CYTOPLASMIC KINASE 11),Os04g0369066(RECEPTOR-LIKE CYTOPLASMIC KINASE 144),Os04g0369100(RECEPTOR-LIKE CYTOPLASMIC KINASE 145),Os04g0608900(dual-specificity protein kinase 4),Os07g0131375,Os08g0230800(Lectin Receptor Kinase paralog),Os11g0548600(lysin motif-containing protein 2),Os11g0669200(RECEPTOR-LIKE CYTOPLASMIC KINASE 350)
BP	GO:0044275	cellular carbohydrate catabolic process	1	0	1	76	0.5149	0.892795	Os09g0530200(glycoside hydrolase OsGH9B14)	-
MF	GO:0004175	endopeptidase activity	5	0	5	465	0.5151	0.892795	Os01g0613500,Os01g0727840("Subtilisin 3),Os01g0806000,Os07g0533300,Os12g0583300	-
BP	GO:0034248	regulation of cellular amide metabolic process	2	0	2	183	0.5182	0.896989	Os01g0952800(basic helix-loop-helix protein 056),Os02g0611500	-
MF	GO:0003677	DNA binding	13	10	23	2241	0.51941	0.897327	Os01g0952800(basic helix-loop-helix protein 056),Os02g0671300(basic helix-loop-helix protein 076),Os03g0251350(HAP5C SUBUNIT OF CCAAT-BOX BINDING COMPLEX),Os03g0798300(METHYLTRANSFERASE 1A),Os05g0326675,Os06g0108500,Os06g0667200(MADS BOX GENE 30),Os07g0533201(WUSCHEL-LIKE HOMEOBOX 9),Os08g0126700(ZINC FINGER CCCH DOMAIN-CONTAINING PROTEIN 54),Os08g0136100(RICE OUTMOST CELL-SPECIFIC GENE 7),Os08g0…	Os01g0186000(WRKY GENE 10),Os01g0339500(NAC DOMAIN-CONTAINING PROTEIN 30),Os02g0564700(basic helix-loop-helix protein 097),Os02g0713700,Os03g0109000(NAC DOMAIN-CONTAINING PROTEIN 55),Os03g0771100,Os04g0678400(DNA BINDING WITH ONE FINGER 17),Os05g0549800(APETALA2/ETHYLENE-RESPONSIVE ELEMENT BINDING PROTEIN 96),Os07g0628500("basic Helix-Loop-Helix protein 1),Os09g0101300
BP	GO:0009651	response to salt stress	1	1	2	184	0.5211	0.897327	Os01g0136100(16.9 KDA CLASS I HEAT SHOCK PROTEIN 1)	Os09g0110300(cyclase-like 4)
BP	GO:0051186	cofactor metabolic process	3	1	4	398	0.5213	0.897327	Os01g0952800(basic helix-loop-helix protein 056),Os02g0258900,Os05g0408900(1-DEOXY-D-XYLULOSE 5-PHOSPHATE SYNTHASE 1)	Os10g0442400
BP	GO:1901137	carbohydrate derivative biosynthetic process	3	1	4	398	0.5213	0.897327	Os02g0142250,Os05g0408900(1-DEOXY-D-XYLULOSE 5-PHOSPHATE SYNTHASE 1),Os10g0459300	Os04g0506800(STLP3)
BP	GO:0000819	sister chromatid segregation	0	1	1	78	0.5241	0.897327	-	Os04g0498900
BP	GO:0018208	peptidyl-proline modification	0	1	1	78	0.5241	0.897327	-	Os06g0708400(CYCLOPHILIN 19-4)
BP	GO:0009893	positive regulation of metabolic process	5	1	6	614	0.5254	0.897327	Os01g0952800(basic helix-loop-helix protein 056),Os02g0671300(basic helix-loop-helix protein 076),Os06g0108500,Os06g0667200(MADS BOX GENE 30),Os08g0246800	Os02g0564700(basic helix-loop-helix protein 097)
BP	GO:1901575	organic substance catabolic process	7	10	17	1786	0.526	0.897327	Os01g0122000("OsPR5),Os01g0613500,Os01g0755700,Os07g0533300,Os07g0607400(PECTIN METHYLESTERASE 20),Os09g0530200(glycoside hydrolase OsGH9B14),Os12g0583300	Os04g0640700,Os06g0486900("FDH2),Os06g0726100(CHITINASE 3),Os09g0110300(cyclase-like 4),Os09g0538000(RIBONUCLEASE 5),Os10g0442400,Os10g0543400,Os11g0245100(ZETA GLUTATHIONE S-TRANSFERASE 4),Os11g0701600,Os12g0595600
CC	GO:0044798	nuclear transcription factor complex	1	0	1	86	0.5271	0.897327	Os01g0952800(basic helix-loop-helix protein 056)	-
MF	GO:0004180	carboxypeptidase activity	1	0	1	73	0.52732	0.897327	Os11g0461000(SERINE CARBOXYPEPTIDASE 61)	-
CC	GO:0009534	chloroplast thylakoid	3	0	3	321	0.5275	0.897327	Os01g0600900(CHLOROPHYLL A/B BINDING PROTEIN 2R),Os04g0457000("light-harvesting protein CP24),Os09g0517000	-
CC	GO:0031976	plastid thylakoid	3	0	3	321	0.5275	0.897327	Os01g0600900(CHLOROPHYLL A/B BINDING PROTEIN 2R),Os04g0457000("light-harvesting protein CP24),Os09g0517000	-
BP	GO:0030243	cellulose metabolic process	1	0	1	79	0.5286	0.897327	Os09g0530200(glycoside hydrolase OsGH9B14)	-
BP	GO:0071214	cellular response to abiotic stimulus	1	0	1	79	0.5286	0.897327	Os08g0246800	-
BP	GO:0104004	cellular response to environmental stimulus	1	0	1	79	0.5286	0.897327	Os08g0246800	-
BP	GO:0009617	response to bacterium	1	1	2	188	0.5327	0.898032	Os02g0156000(RECEPTOR-LIKE CYTOPLASMIC KINASE 62)	Os07g0131375
BP	GO:0006473	protein acetylation	0	1	1	80	0.5331	0.898032	-	Os04g0498900
BP	GO:0006766	vitamin metabolic process	1	0	1	80	0.5331	0.898032	Os05g0408900(1-DEOXY-D-XYLULOSE 5-PHOSPHATE SYNTHASE 1)	-
BP	GO:0006813	potassium ion transport	0	1	1	80	0.5331	0.898032	-	Os08g0466200(HIGH-AFFINITY POTASSIUM(K+) TRANSPORTER 4)
BP	GO:0008219	cell death	0	1	1	80	0.5331	0.898032	-	Os11g0598500
BP	GO:0046148	pigment biosynthetic process	1	0	1	80	0.5331	0.898032	Os05g0408900(1-DEOXY-D-XYLULOSE 5-PHOSPHATE SYNTHASE 1)	-
BP	GO:0050896	response to stimulus	20	18	38	4025	0.5339	0.898232	Os01g0136100(16.9 KDA CLASS I HEAT SHOCK PROTEIN 1),Os01g0197450,Os01g0600900(CHLOROPHYLL A/B BINDING PROTEIN 2R),Os01g0952800(basic helix-loop-helix protein 056),Os02g0156000(RECEPTOR-LIKE CYTOPLASMIC KINASE 62),Os02g0240300(class III peroxidase 29),Os02g0649900(YELLOW STRIP-LIKE GENE 2),Os03g0251350(HAP5C SUBUNIT OF CCAAT-BOX BINDING COMPLEX),Os04g0401000(PYRICULARIA ORYZAE RESISTANCE 21),Os04g…	Os01g0558100(TAU GLUTATHIONE S-TRANSFERASE 6),Os02g0570400(ENT-KAURENE SYNTHASE 7),Os02g0621300("ECERIFERUM 1),Os03g0235000(PEROXIDASE N),Os03g0300400(JASMONATE INDUCIBLE PATHOGENESIS-RELATED CLASS 10 PROTEIN),Os04g0498900,Os04g0608900(dual-specificity protein kinase 4),Os04g0688500(class III peroxidase 62),Os06g0726100(CHITINASE 3),Os07g0131375,Os07g0519600,Os08g0148600,Os09g0110300(cyclase-like…
BP	GO:0007167	enzyme linked receptor protein signaling pathway	2	1	3	298	0.5372	0.899699	Os02g0156000(RECEPTOR-LIKE CYTOPLASMIC KINASE 62),Os05g0398800	Os07g0131375
BP	GO:0007178	transmembrane receptor protein serine/threonine kinase signaling pathway	2	1	3	298	0.5372	0.899699	Os02g0156000(RECEPTOR-LIKE CYTOPLASMIC KINASE 62),Os05g0398800	Os07g0131375
BP	GO:0009991	response to extracellular stimulus	1	0	1	81	0.5375	0.899699	Os01g0952800(basic helix-loop-helix protein 056)	-
BP	GO:0048507	meristem development	1	0	1	81	0.5375	0.899699	Os03g0100020(TETRASPANIN 4)	-
BP	GO:0032502	developmental process	9	4	13	1375	0.5416	0.901511	Os01g0122000("OsPR5),Os02g0649900(YELLOW STRIP-LIKE GENE 2),Os03g0100020(TETRASPANIN 4),Os03g0251350(HAP5C SUBUNIT OF CCAAT-BOX BINDING COMPLEX),Os05g0555600(NADH-DEPENDENT GLUTAMATE SYNTHASE 2),Os06g0108500,Os06g0667200(MADS BOX GENE 30),Os09g0530200(glycoside hydrolase OsGH9B14),Os11g0471300	Os02g0713700,Os03g0771100,Os06g0708400(CYCLOPHILIN 19-4),Os07g0519600
MF	GO:0004724	magnesium-dependent protein serine/threonine phosphatase activity	0	1	1	76	0.54169	0.901511	-	Os02g0607500("protein phosphatase 2C22)
MF	GO:0015333	peptide:proton symporter activity	1	0	1	76	0.54169	0.901511	Os10g0111700	-
MF	GO:0022897	proton-dependent peptide secondary active transmembrane transporter activity	1	0	1	76	0.54169	0.901511	Os10g0111700	-
MF	GO:0016772	transferase activity, transferring phosphorus-containing groups	12	11	23	2266	0.542	0.901511	Os01g0669100(Large spike S-domain receptor like Kinase 1),Os01g0883000(RECEPTOR-LIKE CYTOPLASMIC KINASE 50),Os02g0142250,Os02g0156000(RECEPTOR-LIKE CYTOPLASMIC KINASE 62),Os03g0636800(NIMA-related kinase 1),Os04g0483450,Os05g0166300,Os05g0398800,Os07g0537500,Os08g0179000,Os08g0441100(CALCINEURIN B-LIKE PROTEIN-INTERACTING PROTEIN KINASE 6),Os09g0294000	Os01g0115600(RECEPTOR-LIKE CYTOPLASMIC KINASE 11),Os03g0262000,Os04g0369066(RECEPTOR-LIKE CYTOPLASMIC KINASE 144),Os04g0369100(RECEPTOR-LIKE CYTOPLASMIC KINASE 145),Os04g0608900(dual-specificity protein kinase 4),Os07g0131375,Os08g0230800(Lectin Receptor Kinase paralog),Os10g0442400,Os11g0514400,Os11g0548600(lysin motif-containing protein 2),Os11g0669200(RECEPTOR-LIKE CYTOPLASMIC KINASE 350)
BP	GO:1901700	response to oxygen-containing compound	2	4	6	625	0.5428	0.901704	Os01g0136100(16.9 KDA CLASS I HEAT SHOCK PROTEIN 1),Os01g0952800(basic helix-loop-helix protein 056)	Os02g0621300("ECERIFERUM 1),Os03g0300400(JASMONATE INDUCIBLE PATHOGENESIS-RELATED CLASS 10 PROTEIN),Os07g0519600,Os09g0110300(cyclase-like 4)
BP	GO:0003333	amino acid transmembrane transport	1	0	1	83	0.5462	0.905371	Os12g0194900("amino acid permease 10B)	-
MF	GO:0016811	hydrolase activity, acting on carbon-nitrogen (but not peptide) bonds, in linear amides	0	1	1	77	0.54638	0.905371	-	Os09g0110300(cyclase-like 4)
BP	GO:0006096	glycolytic process	0	1	1	84	0.5506	0.905455	-	Os10g0442400
BP	GO:0006757	ATP generation from ADP	0	1	1	84	0.5506	0.905455	-	Os10g0442400
BP	GO:0046031	ADP metabolic process	0	1	1	84	0.5506	0.905455	-	Os10g0442400
MF	GO:0016891	endoribonuclease activity, producing 5'-phosphomonoesters	0	1	1	78	0.55102	0.905455	-	Os08g0148600
BP	GO:0019438	aromatic compound biosynthetic process	13	14	27	2881	0.5523	0.905455	Os01g0566800(basic helix-loop-helix protein 117),Os01g0952800(basic helix-loop-helix protein 056),Os02g0671300(basic helix-loop-helix protein 076),Os03g0251350(HAP5C SUBUNIT OF CCAAT-BOX BINDING COMPLEX),Os04g0483450,Os05g0408900(1-DEOXY-D-XYLULOSE 5-PHOSPHATE SYNTHASE 1),Os06g0108500,Os06g0667200(MADS BOX GENE 30),Os08g0136100(RICE OUTMOST CELL-SPECIFIC GENE 7),Os08g0246800,Os08g0499300(WRKY GEN…	Os01g0186000(WRKY GENE 10),Os01g0339500(NAC DOMAIN-CONTAINING PROTEIN 30),Os01g0676900,Os02g0564700(basic helix-loop-helix protein 097),Os02g0713700,Os02g0811800(CINNAMOYL-COA REDUCTASE 10),Os03g0109000(NAC DOMAIN-CONTAINING PROTEIN 55),Os03g0771100,Os04g0678400(DNA BINDING WITH ONE FINGER 17),Os05g0390800(VQ motif-containing protein 19),Os05g0549800(APETALA2/ETHYLENE-RESPONSIVE ELEMENT BINDING P…
BP	GO:0043414	macromolecule methylation	1	1	2	195	0.5525	0.905455	Os03g0798300(METHYLTRANSFERASE 1A)	Os10g0442400
MF	GO:0051213	dioxygenase activity	0	2	2	181	0.55283	0.905455	-	Os01g0832600,Os04g0581000
MF	GO:0016853	isomerase activity	1	2	3	283	0.55306	0.905455	Os11g0285000("oxidosqualene cyclase 8)	Os06g0708400(CYCLOPHILIN 19-4),Os11g0245100(ZETA GLUTATHIONE S-TRANSFERASE 4)
BP	GO:1901565	organonitrogen compound catabolic process	5	6	11	1171	0.5533	0.905455	Os01g0122000("OsPR5),Os01g0613500,Os01g0755700,Os07g0533300,Os12g0583300	Os06g0726100(CHITINASE 3),Os09g0110300(cyclase-like 4),Os10g0543400,Os11g0245100(ZETA GLUTATHIONE S-TRANSFERASE 4),Os11g0701600,Os12g0595600
BP	GO:0031047	gene silencing by RNA	0	1	1	85	0.5548	0.905455	-	Os08g0148600
BP	GO:0035672	oligopeptide transmembrane transport	1	0	1	85	0.5548	0.905455	Os10g0111700	-
BP	GO:0010154	fruit development	2	0	2	196	0.5552	0.905455	Os02g0649900(YELLOW STRIP-LIKE GENE 2),Os09g0530200(glycoside hydrolase OsGH9B14)	-
CC	GO:0048046	apoplast	0	2	2	215	0.5573	0.905455	-	Os11g0214400,Os11g0214900
BP	GO:0000723	telomere maintenance	1	0	1	86	0.5591	0.905455	Os07g0255200	-
BP	GO:0009135	purine nucleoside diphosphate metabolic process	0	1	1	86	0.5591	0.905455	-	Os10g0442400
BP	GO:0009179	purine ribonucleoside diphosphate metabolic process	0	1	1	86	0.5591	0.905455	-	Os10g0442400
BP	GO:0016125	sterol metabolic process	0	1	1	86	0.5591	0.905455	-	Os07g0519600
BP	GO:0032200	telomere organization	1	0	1	86	0.5591	0.905455	Os07g0255200	-
BP	GO:0048731	system development	4	2	6	636	0.56	0.905455	Os02g0649900(YELLOW STRIP-LIKE GENE 2),Os03g0100020(TETRASPANIN 4),Os03g0251350(HAP5C SUBUNIT OF CCAAT-BOX BINDING COMPLEX),Os09g0530200(glycoside hydrolase OsGH9B14)	Os02g0713700,Os06g0708400(CYCLOPHILIN 19-4)
MF	GO:0003678	DNA helicase activity	1	0	1	80	0.56016	0.905455	Os07g0255200	-
CC	GO:0005635	nuclear envelope	1	0	1	95	0.5629	0.908143	Os12g0236100	-
BP	GO:0060249	anatomical structure homeostasis	1	0	1	87	0.5632	0.908143	Os07g0255200	-
BP	GO:0008652	cellular amino acid biosynthetic process	2	0	2	200	0.5662	0.910463	Os05g0555600(NADH-DEPENDENT GLUTAMATE SYNTHASE 2),Os09g0294000	-
BP	GO:0009185	ribonucleoside diphosphate metabolic process	0	1	1	88	0.5674	0.910463	-	Os10g0442400
BP	GO:0009639	response to red or far red light	1	0	1	88	0.5674	0.910463	Os08g0246800	-
BP	GO:0032508	DNA duplex unwinding	1	0	1	88	0.5674	0.910463	Os07g0255200	-
MF	GO:0140097	catalytic activity, acting on DNA	3	0	3	290	0.56965	0.911096	Os03g0798300(METHYLTRANSFERASE 1A),Os04g0483450,Os07g0255200	-
BP	GO:0060255	regulation of macromolecule metabolic process	13	15	28	3013	0.5719	0.911096	Os01g0566800(basic helix-loop-helix protein 117),Os01g0952800(basic helix-loop-helix protein 056),Os02g0611500,Os02g0671300(basic helix-loop-helix protein 076),Os03g0251350(HAP5C SUBUNIT OF CCAAT-BOX BINDING COMPLEX),Os03g0798300(METHYLTRANSFERASE 1A),Os06g0108500,Os06g0667200(MADS BOX GENE 30),Os08g0136100(RICE OUTMOST CELL-SPECIFIC GENE 7),Os08g0246800,Os08g0499300(WRKY GENE 30),Os08g0508700(ET…	Os01g0186000(WRKY GENE 10),Os01g0339500(NAC DOMAIN-CONTAINING PROTEIN 30),Os01g0676900,Os02g0564700(basic helix-loop-helix protein 097),Os02g0713700,Os03g0109000(NAC DOMAIN-CONTAINING PROTEIN 55),Os03g0300400(JASMONATE INDUCIBLE PATHOGENESIS-RELATED CLASS 10 PROTEIN),Os03g0771100,Os04g0498900,Os04g0678400(DNA BINDING WITH ONE FINGER 17),Os05g0390800(VQ motif-containing protein 19),Os05g0549800(AP…
BP	GO:0070887	cellular response to chemical stimulus	2	6	8	862	0.5722	0.911096	Os01g0952800(basic helix-loop-helix protein 056),Os02g0240300(class III peroxidase 29)	Os03g0235000(PEROXIDASE N),Os03g0300400(JASMONATE INDUCIBLE PATHOGENESIS-RELATED CLASS 10 PROTEIN),Os04g0688500(class III peroxidase 62),Os08g0148600,Os10g0109600(PEROXIDASE A),Os11g0112200(class III peroxidase 131)
MF	GO:0004197	cysteine-type endopeptidase activity	1	0	1	83	0.57353	0.911096	Os01g0613500	-
MF	GO:0008233	peptidase activity	8	0	8	801	0.57398	0.911096	Os01g0613500,Os01g0727840("Subtilisin 3),Os01g0806000,Os07g0108100,Os07g0532500,Os07g0533300,Os11g0461000(SERINE CARBOXYPEPTIDASE 61),Os12g0583300	-
CC	GO:0005789	endoplasmic reticulum membrane	1	2	3	344	0.5744	0.911096	Os02g0142250	Os02g0621300("ECERIFERUM 1),Os04g0369000(RECEPTOR-LIKE CYTOPLASMIC KINASE 144)
BP	GO:0032392	DNA geometric change	1	0	1	90	0.5756	0.911096	Os07g0255200	-
CC	GO:0042175	nuclear outer membrane-endoplasmic reticulum membrane network	1	2	3	345	0.5764	0.911096	Os02g0142250	Os02g0621300("ECERIFERUM 1),Os04g0369000(RECEPTOR-LIKE CYTOPLASMIC KINASE 144)
BP	GO:0006520	cellular amino acid metabolic process	2	2	4	427	0.577	0.911096	Os05g0555600(NADH-DEPENDENT GLUTAMATE SYNTHASE 2),Os09g0294000	Os09g0110300(cyclase-like 4),Os11g0245100(ZETA GLUTATHIONE S-TRANSFERASE 4)
CC	GO:0005773	vacuole	3	1	4	467	0.5777	0.911096	Os01g0232000(TONOPLAST INTRINSIC PROTEIN 4;3),Os01g0613500,Os06g0561800(MULTIDRUG RESISTANCE-ASSOCIATED PROTEIN 11)	Os01g0902100(MULTIDRUG RESISTANCE-ASSOCIATED PROTEIN 2)
CC	GO:0099023	tethering complex	0	1	1	99	0.5779	0.911096	-	Os02g0575900(EXOCYST SUBUNIT EXO70 FAMILY PROTEIN FX6)
BP	GO:0006165	nucleoside diphosphate phosphorylation	0	1	1	91	0.5796	0.911096	-	Os10g0442400
BP	GO:0006857	oligopeptide transport	1	0	1	91	0.5796	0.911096	Os10g0111700	-
BP	GO:0042180	cellular ketone metabolic process	0	1	1	91	0.5796	0.911096	-	Os09g0110300(cyclase-like 4)
BP	GO:0043648	dicarboxylic acid metabolic process	1	0	1	91	0.5796	0.911096	Os05g0555600(NADH-DEPENDENT GLUTAMATE SYNTHASE 2)	-
MF	GO:0004519	endonuclease activity	2	4	6	603	0.58133	0.911096	Os01g0197450,Os01g0715900	Os07g0588100,Os08g0148600,Os09g0417500,Os09g0538000(RIBONUCLEASE 5)
MF	GO:0015198	oligopeptide transporter activity	1	0	1	85	0.58222	0.911096	Os10g0111700	-
MF	GO:0031406	carboxylic acid binding	0	1	1	85	0.58222	0.911096	-	Os03g0300400(JASMONATE INDUCIBLE PATHOGENESIS-RELATED CLASS 10 PROTEIN)
MF	GO:0035673	oligopeptide transmembrane transporter activity	1	0	1	85	0.58222	0.911096	Os10g0111700	-
MF	GO:0043177	organic acid binding	0	1	1	85	0.58222	0.911096	-	Os03g0300400(JASMONATE INDUCIBLE PATHOGENESIS-RELATED CLASS 10 PROTEIN)
CC	GO:0098827	endoplasmic reticulum subcompartment	1	2	3	348	0.5823	0.911096	Os02g0142250	Os02g0621300("ECERIFERUM 1),Os04g0369000(RECEPTOR-LIKE CYTOPLASMIC KINASE 144)
MF	GO:0043531	ADP binding	2	3	5	502	0.58329	0.911563	Os07g0117300,Os08g0170700	Os03g0347900,Os11g0590900,Os11g0598500
BP	GO:0006970	response to osmotic stress	1	1	2	207	0.585	0.911582	Os01g0136100(16.9 KDA CLASS I HEAT SHOCK PROTEIN 1)	Os09g0110300(cyclase-like 4)
MF	GO:0004675	transmembrane receptor protein serine/threonine kinase activity	2	1	3	297	0.58585	0.911582	Os02g0156000(RECEPTOR-LIKE CYTOPLASMIC KINASE 62),Os05g0398800	Os07g0131375
BP	GO:0006796	phosphate-containing compound metabolic process	14	13	27	2925	0.5864	0.911582	Os01g0191200,Os01g0669100(Large spike S-domain receptor like Kinase 1),Os01g0883000(RECEPTOR-LIKE CYTOPLASMIC KINASE 50),Os02g0142250,Os02g0156000(RECEPTOR-LIKE CYTOPLASMIC KINASE 62),Os02g0258900,Os03g0636800(NIMA-related kinase 1),Os05g0166300,Os05g0398800,Os05g0408900(1-DEOXY-D-XYLULOSE 5-PHOSPHATE SYNTHASE 1),Os07g0537500,Os08g0179000,Os08g0441100(CALCINEURIN B-LIKE PROTEIN-INTERACTING PROTEI…	Os01g0115600(RECEPTOR-LIKE CYTOPLASMIC KINASE 11),Os02g0607500("protein phosphatase 2C22),Os03g0262000,Os03g0300400(JASMONATE INDUCIBLE PATHOGENESIS-RELATED CLASS 10 PROTEIN),Os04g0369066(RECEPTOR-LIKE CYTOPLASMIC KINASE 144),Os04g0369100(RECEPTOR-LIKE CYTOPLASMIC KINASE 145),Os04g0608900(dual-specificity protein kinase 4),Os07g0131375,Os08g0230800(Lectin Receptor Kinase paralog),Os10g0442400,Os1…
MF	GO:0051539	4 iron, 4 sulfur cluster binding	1	0	1	86	0.58649	0.911582	Os02g0258900	-
BP	GO:0018105	peptidyl-serine phosphorylation	1	0	1	93	0.5876	0.911582	Os08g0441100(CALCINEURIN B-LIKE PROTEIN-INTERACTING PROTEIN KINASE 6)	-
BP	GO:0046700	heterocycle catabolic process	0	2	2	208	0.5876	0.911582	-	Os09g0110300(cyclase-like 4),Os09g0538000(RIBONUCLEASE 5)
MF	GO:0019199	transmembrane receptor protein kinase activity	2	1	3	298	0.58814	0.911582	Os02g0156000(RECEPTOR-LIKE CYTOPLASMIC KINASE 62),Os05g0398800	Os07g0131375
MF	GO:0034061	DNA polymerase activity	1	0	1	87	0.59073	0.914522	Os04g0483450	-
BP	GO:0006694	steroid biosynthetic process	0	1	1	94	0.5915	0.914641	-	Os07g0519600
BP	GO:0044270	cellular nitrogen compound catabolic process	0	2	2	210	0.5928	0.914751	-	Os09g0110300(cyclase-like 4),Os09g0538000(RIBONUCLEASE 5)
BP	GO:0009698	phenylpropanoid metabolic process	0	1	1	95	0.5954	0.914751	-	Os02g0811800(CINNAMOYL-COA REDUCTASE 10)
BP	GO:0140013	meiotic nuclear division	0	1	1	95	0.5954	0.914751	-	Os04g0498900
BP	GO:0046777	protein autophosphorylation	1	1	2	211	0.5954	0.914751	Os01g0883000(RECEPTOR-LIKE CYTOPLASMIC KINASE 50)	Os11g0669200(RECEPTOR-LIKE CYTOPLASMIC KINASE 350)
MF	GO:0016893	endonuclease activity, active with either ribo- or deoxyribonucleic acids and producing 5'-phosphomonoesters	0	1	1	89	0.59907	0.914751	-	Os08g0148600
MF	GO:0042277	peptide binding	0	1	1	89	0.59907	0.914751	-	Os06g0708400(CYCLOPHILIN 19-4)
MF	GO:0051287	NAD binding	0	1	1	89	0.59907	0.914751	-	Os06g0486900("FDH2)
BP	GO:0006865	amino acid transport	1	0	1	96	0.5992	0.914751	Os12g0194900("amino acid permease 10B)	-
BP	GO:0018209	peptidyl-serine modification	1	0	1	96	0.5992	0.914751	Os08g0441100(CALCINEURIN B-LIKE PROTEIN-INTERACTING PROTEIN KINASE 6)	-
BP	GO:0046467	membrane lipid biosynthetic process	0	1	1	96	0.5992	0.914751	-	Os02g0621300("ECERIFERUM 1)
BP	GO:1905392	plant organ morphogenesis	1	0	1	96	0.5992	0.914751	Os03g0100020(TETRASPANIN 4)	-
BP	GO:0006073	cellular glucan metabolic process	1	1	2	213	0.6006	0.915828	Os09g0530200(glycoside hydrolase OsGH9B14)	Os02g0247000
BP	GO:0009132	nucleoside diphosphate metabolic process	0	1	1	97	0.603	0.916097	-	Os10g0442400
BP	GO:0048585	negative regulation of response to stimulus	1	0	1	97	0.603	0.916097	Os03g0251350(HAP5C SUBUNIT OF CCAAT-BOX BINDING COMPLEX)	-
BP	GO:0010608	posttranscriptional regulation of gene expression	1	1	2	214	0.6031	0.916097	Os02g0611500	Os08g0148600
BP	GO:0051171	regulation of nitrogen compound metabolic process	12	14	26	2840	0.6036	0.916097	Os01g0566800(basic helix-loop-helix protein 117),Os01g0952800(basic helix-loop-helix protein 056),Os02g0611500,Os02g0671300(basic helix-loop-helix protein 076),Os03g0251350(HAP5C SUBUNIT OF CCAAT-BOX BINDING COMPLEX),Os06g0108500,Os06g0667200(MADS BOX GENE 30),Os08g0136100(RICE OUTMOST CELL-SPECIFIC GENE 7),Os08g0246800,Os08g0499300(WRKY GENE 30),Os08g0508700(ETHYLENE INSENSITIVE-LIKE GENE 4),Os1…	Os01g0186000(WRKY GENE 10),Os01g0339500(NAC DOMAIN-CONTAINING PROTEIN 30),Os01g0676900,Os02g0564700(basic helix-loop-helix protein 097),Os02g0713700,Os03g0109000(NAC DOMAIN-CONTAINING PROTEIN 55),Os03g0300400(JASMONATE INDUCIBLE PATHOGENESIS-RELATED CLASS 10 PROTEIN),Os03g0771100,Os04g0498900,Os04g0678400(DNA BINDING WITH ONE FINGER 17),Os05g0390800(VQ motif-containing protein 19),Os05g0549800(AP…
BP	GO:0006644	phospholipid metabolic process	1	1	2	215	0.6057	0.916097	Os02g0142250	Os03g0262000
BP	GO:0006887	exocytosis	0	1	1	98	0.6068	0.916097	-	Os02g0575900(EXOCYST SUBUNIT EXO70 FAMILY PROTEIN FX6)
BP	GO:1901699	cellular response to nitrogen compound	0	1	1	98	0.6068	0.916097	-	Os08g0148600
MF	GO:0015171	amino acid transmembrane transporter activity	1	0	1	91	0.60724	0.916097	Os12g0194900("amino acid permease 10B)	-
MF	GO:0043167	ion binding	32	36	68	6806	0.60789	0.916097	Os01g0600900(CHLOROPHYLL A/B BINDING PROTEIN 2R),Os01g0669100(Large spike S-domain receptor like Kinase 1),Os01g0755700,Os01g0883000(RECEPTOR-LIKE CYTOPLASMIC KINASE 50),Os02g0156000(RECEPTOR-LIKE CYTOPLASMIC KINASE 62),Os02g0240300(class III peroxidase 29),Os02g0258900,Os02g0734400,Os03g0636800(NIMA-related kinase 1),Os03g0861400,Os04g0223500,Os04g0401000(PYRICULARIA ORYZAE RESISTANCE 21),Os05g0…	Os01g0115600(RECEPTOR-LIKE CYTOPLASMIC KINASE 11),Os01g0791033,Os01g0832600,Os01g0902100(MULTIDRUG RESISTANCE-ASSOCIATED PROTEIN 2),Os02g0570400(ENT-KAURENE SYNTHASE 7),Os02g0607500("protein phosphatase 2C22),Os02g0621300("ECERIFERUM 1),Os03g0262000,Os03g0300400(JASMONATE INDUCIBLE PATHOGENESIS-RELATED CLASS 10 PROTEIN),Os03g0347900,Os03g0348200(terpene synthase 10),Os04g0369066(RECEPTOR-LIKE CYT…
BP	GO:0048608	reproductive structure development	3	1	4	444	0.6079	0.916097	Os02g0649900(YELLOW STRIP-LIKE GENE 2),Os03g0251350(HAP5C SUBUNIT OF CCAAT-BOX BINDING COMPLEX),Os09g0530200(glycoside hydrolase OsGH9B14)	Os02g0713700
BP	GO:0061458	reproductive system development	3	1	4	445	0.6097	0.916097	Os02g0649900(YELLOW STRIP-LIKE GENE 2),Os03g0251350(HAP5C SUBUNIT OF CCAAT-BOX BINDING COMPLEX),Os09g0530200(glycoside hydrolase OsGH9B14)	Os02g0713700
BP	GO:0006400	tRNA modification	0	1	1	99	0.6105	0.916097	-	Os10g0442400
BP	GO:0009311	oligosaccharide metabolic process	0	1	1	99	0.6105	0.916097	-	Os04g0506800(STLP3)
BP	GO:0042440	pigment metabolic process	1	0	1	99	0.6105	0.916097	Os05g0408900(1-DEOXY-D-XYLULOSE 5-PHOSPHATE SYNTHASE 1)	-
BP	GO:0006820	anion transport	2	1	3	333	0.6126	0.91806	Os05g0269200,Os12g0194900("amino acid permease 10B)	Os07g0519600
BP	GO:0006399	tRNA metabolic process	0	2	2	218	0.6132	0.91806	-	CAA34008,Os10g0442400
BP	GO:0031347	regulation of defense response	1	0	1	100	0.6142	0.918515	Os04g0401000(PYRICULARIA ORYZAE RESISTANCE 21)	-
BP	GO:0015979	photosynthesis	2	0	2	219	0.6157	0.918675	Os01g0600900(CHLOROPHYLL A/B BINDING PROTEIN 2R),Os04g0457000("light-harvesting protein CP24)	-
BP	GO:0044042	glucan metabolic process	1	1	2	219	0.6157	0.918675	Os09g0530200(glycoside hydrolase OsGH9B14)	Os02g0247000
BP	GO:0034654	nucleobase-containing compound biosynthetic process	12	12	24	2642	0.6173	0.919141	Os01g0566800(basic helix-loop-helix protein 117),Os01g0952800(basic helix-loop-helix protein 056),Os02g0671300(basic helix-loop-helix protein 076),Os03g0251350(HAP5C SUBUNIT OF CCAAT-BOX BINDING COMPLEX),Os04g0483450,Os06g0108500,Os06g0667200(MADS BOX GENE 30),Os08g0136100(RICE OUTMOST CELL-SPECIFIC GENE 7),Os08g0246800,Os08g0499300(WRKY GENE 30),Os08g0508700(ETHYLENE INSENSITIVE-LIKE GENE 4),Os1…	Os01g0186000(WRKY GENE 10),Os01g0339500(NAC DOMAIN-CONTAINING PROTEIN 30),Os01g0676900,Os02g0564700(basic helix-loop-helix protein 097),Os02g0713700,Os03g0109000(NAC DOMAIN-CONTAINING PROTEIN 55),Os03g0771100,Os04g0678400(DNA BINDING WITH ONE FINGER 17),Os05g0390800(VQ motif-containing protein 19),Os05g0549800(APETALA2/ETHYLENE-RESPONSIVE ELEMENT BINDING PROTEIN 96),Os07g0628500("basic Helix-Loop…
BP	GO:0090150	establishment of protein localization to membrane	0	1	1	101	0.6179	0.919141	-	Os05g0509500
BP	GO:0009737	response to abscisic acid	0	2	2	220	0.6182	0.919141	-	Os02g0621300("ECERIFERUM 1),Os03g0300400(JASMONATE INDUCIBLE PATHOGENESIS-RELATED CLASS 10 PROTEIN)
BP	GO:0080090	regulation of primary metabolic process	12	14	26	2860	0.6188	0.919141	Os01g0566800(basic helix-loop-helix protein 117),Os01g0952800(basic helix-loop-helix protein 056),Os02g0611500,Os02g0671300(basic helix-loop-helix protein 076),Os03g0251350(HAP5C SUBUNIT OF CCAAT-BOX BINDING COMPLEX),Os06g0108500,Os06g0667200(MADS BOX GENE 30),Os08g0136100(RICE OUTMOST CELL-SPECIFIC GENE 7),Os08g0246800,Os08g0499300(WRKY GENE 30),Os08g0508700(ETHYLENE INSENSITIVE-LIKE GENE 4),Os1…	Os01g0186000(WRKY GENE 10),Os01g0339500(NAC DOMAIN-CONTAINING PROTEIN 30),Os01g0676900,Os02g0564700(basic helix-loop-helix protein 097),Os02g0713700,Os03g0109000(NAC DOMAIN-CONTAINING PROTEIN 55),Os03g0300400(JASMONATE INDUCIBLE PATHOGENESIS-RELATED CLASS 10 PROTEIN),Os03g0771100,Os04g0498900,Os04g0678400(DNA BINDING WITH ONE FINGER 17),Os05g0390800(VQ motif-containing protein 19),Os05g0549800(AP…
BP	GO:0006793	phosphorus metabolic process	14	13	27	2974	0.6234	0.919416	Os01g0191200,Os01g0669100(Large spike S-domain receptor like Kinase 1),Os01g0883000(RECEPTOR-LIKE CYTOPLASMIC KINASE 50),Os02g0142250,Os02g0156000(RECEPTOR-LIKE CYTOPLASMIC KINASE 62),Os02g0258900,Os03g0636800(NIMA-related kinase 1),Os05g0166300,Os05g0398800,Os05g0408900(1-DEOXY-D-XYLULOSE 5-PHOSPHATE SYNTHASE 1),Os07g0537500,Os08g0179000,Os08g0441100(CALCINEURIN B-LIKE PROTEIN-INTERACTING PROTEI…	Os01g0115600(RECEPTOR-LIKE CYTOPLASMIC KINASE 11),Os02g0607500("protein phosphatase 2C22),Os03g0262000,Os03g0300400(JASMONATE INDUCIBLE PATHOGENESIS-RELATED CLASS 10 PROTEIN),Os04g0369066(RECEPTOR-LIKE CYTOPLASMIC KINASE 144),Os04g0369100(RECEPTOR-LIKE CYTOPLASMIC KINASE 145),Os04g0608900(dual-specificity protein kinase 4),Os07g0131375,Os08g0230800(Lectin Receptor Kinase paralog),Os10g0442400,Os1…
CC	GO:0005783	endoplasmic reticulum	3	3	6	743	0.6256	0.919416	Os02g0142250,Os04g0483500("beta-ketoacyl-CoA reductase 1),Os06g0299100	Os02g0621300("ECERIFERUM 1),Os04g0369000(RECEPTOR-LIKE CYTOPLASMIC KINASE 144),Os06g0708400(CYCLOPHILIN 19-4)
MF	GO:0001135	transcription factor activity, RNA polymerase II transcription factor recruiting	0	1	1	96	0.62694	0.919416	-	Os03g0771100
MF	GO:0004004	ATP-dependent RNA helicase activity	1	0	1	96	0.62694	0.919416	Os06g0602400(RNA helicase 52A)	-
BP	GO:0031323	regulation of cellular metabolic process	12	14	26	2873	0.6286	0.919416	Os01g0566800(basic helix-loop-helix protein 117),Os01g0952800(basic helix-loop-helix protein 056),Os02g0611500,Os02g0671300(basic helix-loop-helix protein 076),Os03g0251350(HAP5C SUBUNIT OF CCAAT-BOX BINDING COMPLEX),Os06g0108500,Os06g0667200(MADS BOX GENE 30),Os08g0136100(RICE OUTMOST CELL-SPECIFIC GENE 7),Os08g0246800,Os08g0499300(WRKY GENE 30),Os08g0508700(ETHYLENE INSENSITIVE-LIKE GENE 4),Os1…	Os01g0186000(WRKY GENE 10),Os01g0339500(NAC DOMAIN-CONTAINING PROTEIN 30),Os01g0676900,Os02g0564700(basic helix-loop-helix protein 097),Os02g0713700,Os03g0109000(NAC DOMAIN-CONTAINING PROTEIN 55),Os03g0300400(JASMONATE INDUCIBLE PATHOGENESIS-RELATED CLASS 10 PROTEIN),Os03g0771100,Os04g0498900,Os04g0678400(DNA BINDING WITH ONE FINGER 17),Os05g0390800(VQ motif-containing protein 19),Os05g0549800(AP…
BP	GO:0090407	organophosphate biosynthetic process	3	0	3	341	0.6286	0.919416	Os02g0142250,Os02g0258900,Os05g0408900(1-DEOXY-D-XYLULOSE 5-PHOSPHATE SYNTHASE 1)	-
BP	GO:0010393	galacturonan metabolic process	1	0	1	104	0.6287	0.919416	Os07g0607400(PECTIN METHYLESTERASE 20)	-
BP	GO:0045488	pectin metabolic process	1	0	1	104	0.6287	0.919416	Os07g0607400(PECTIN METHYLESTERASE 20)	-
BP	GO:0051346	negative regulation of hydrolase activity	0	1	1	104	0.6287	0.919416	-	Os03g0300400(JASMONATE INDUCIBLE PATHOGENESIS-RELATED CLASS 10 PROTEIN)
BP	GO:0097305	response to alcohol	0	2	2	225	0.6304	0.919416	-	Os02g0621300("ECERIFERUM 1),Os03g0300400(JASMONATE INDUCIBLE PATHOGENESIS-RELATED CLASS 10 PROTEIN)
MF	GO:0003724	RNA helicase activity	1	0	1	97	0.63076	0.919416	Os06g0602400(RNA helicase 52A)	-
MF	GO:0008186	RNA-dependent ATPase activity	1	0	1	97	0.63076	0.919416	Os06g0602400(RNA helicase 52A)	-
MF	GO:0042626	ATPase activity, coupled to transmembrane movement of substances	1	1	2	209	0.63116	0.919416	Os06g0561800(MULTIDRUG RESISTANCE-ASSOCIATED PROTEIN 11)	Os01g0902100(MULTIDRUG RESISTANCE-ASSOCIATED PROTEIN 2)
BP	GO:0046488	phosphatidylinositol metabolic process	0	1	1	105	0.6322	0.919416	-	Os03g0262000
BP	GO:1903825	organic acid transmembrane transport	1	0	1	105	0.6322	0.919416	Os12g0194900("amino acid permease 10B)	-
BP	GO:1905039	carboxylic acid transmembrane transport	1	0	1	105	0.6322	0.919416	Os12g0194900("amino acid permease 10B)	-
MF	GO:0016820	hydrolase activity, acting on acid anhydrides, catalyzing transmembrane movement of substances	1	1	2	210	0.63375	0.919416	Os06g0561800(MULTIDRUG RESISTANCE-ASSOCIATED PROTEIN 11)	Os01g0902100(MULTIDRUG RESISTANCE-ASSOCIATED PROTEIN 2)
MF	GO:0001134	transcription factor activity, transcription factor recruiting	0	1	1	98	0.63455	0.919416	-	Os03g0771100
BP	GO:0048856	anatomical structure development	7	3	10	1134	0.6357	0.919416	Os01g0122000("OsPR5),Os02g0649900(YELLOW STRIP-LIKE GENE 2),Os03g0100020(TETRASPANIN 4),Os03g0251350(HAP5C SUBUNIT OF CCAAT-BOX BINDING COMPLEX),Os06g0108500,Os06g0667200(MADS BOX GENE 30),Os09g0530200(glycoside hydrolase OsGH9B14)	Os02g0713700,Os06g0708400(CYCLOPHILIN 19-4),Os07g0519600
MF	GO:0004386	helicase activity	2	0	2	211	0.63632	0.919416	Os06g0602400(RNA helicase 52A),Os07g0255200	-
CC	GO:0005618	cell wall	1	2	3	377	0.6365	0.919416	Os07g0607400(PECTIN METHYLESTERASE 20)	Os04g0640700,Os04g0688500(class III peroxidase 62)
CC	GO:0030312	external encapsulating structure	1	2	3	377	0.6365	0.919416	Os07g0607400(PECTIN METHYLESTERASE 20)	Os04g0640700,Os04g0688500(class III peroxidase 62)
CC	GO:0044432	endoplasmic reticulum part	1	2	3	377	0.6365	0.919416	Os02g0142250	Os02g0621300("ECERIFERUM 1),Os04g0369000(RECEPTOR-LIKE CYTOPLASMIC KINASE 144)
BP	GO:0001101	response to acid chemical	0	4	4	462	0.6391	0.919416	-	Os02g0621300("ECERIFERUM 1),Os03g0300400(JASMONATE INDUCIBLE PATHOGENESIS-RELATED CLASS 10 PROTEIN),Os07g0519600,Os09g0110300(cyclase-like 4)
BP	GO:0006090	pyruvate metabolic process	0	1	1	107	0.6392	0.919416	-	Os10g0442400
BP	GO:0008202	steroid metabolic process	0	1	1	107	0.6392	0.919416	-	Os07g0519600
BP	GO:0046939	nucleotide phosphorylation	0	1	1	107	0.6392	0.919416	-	Os10g0442400
BP	GO:0071407	cellular response to organic cyclic compound	0	1	1	107	0.6392	0.919416	-	Os08g0148600
BP	GO:0098813	nuclear chromosome segregation	0	1	1	107	0.6392	0.919416	-	Os04g0498900
BP	GO:0065007	biological regulation	30	23	53	5791	0.6411	0.920717	Os01g0197450,Os01g0566800(basic helix-loop-helix protein 117),Os01g0952800(basic helix-loop-helix protein 056),Os02g0156000(RECEPTOR-LIKE CYTOPLASMIC KINASE 62),Os02g0611500,Os02g0649900(YELLOW STRIP-LIKE GENE 2),Os02g0671300(basic helix-loop-helix protein 076),Os03g0100020(TETRASPANIN 4),Os03g0251350(HAP5C SUBUNIT OF CCAAT-BOX BINDING COMPLEX),Os03g0667500(ZINC TRANSPORTER 10),Os03g0751100("Olig…	Os01g0186000(WRKY GENE 10),Os01g0339500(NAC DOMAIN-CONTAINING PROTEIN 30),Os01g0676900,Os02g0564700(basic helix-loop-helix protein 097),Os02g0713700,Os03g0109000(NAC DOMAIN-CONTAINING PROTEIN 55),Os03g0300400(JASMONATE INDUCIBLE PATHOGENESIS-RELATED CLASS 10 PROTEIN),Os03g0771100,Os04g0400000,Os04g0498900,Os04g0608900(dual-specificity protein kinase 4),Os04g0678400(DNA BINDING WITH ONE FINGER 17)…
CC	GO:0031984	organelle subcompartment	4	4	8	1001	0.6415	0.920717	Os01g0600900(CHLOROPHYLL A/B BINDING PROTEIN 2R),Os02g0142250,Os04g0457000("light-harvesting protein CP24),Os09g0517000	Os02g0621300("ECERIFERUM 1),Os04g0369000(RECEPTOR-LIKE CYTOPLASMIC KINASE 144),Os04g0506800(STLP3),Os06g0708400(CYCLOPHILIN 19-4)
BP	GO:0006629	lipid metabolic process	2	6	8	919	0.6448	0.924447	Os02g0142250,Os05g0408900(1-DEOXY-D-XYLULOSE 5-PHOSPHATE SYNTHASE 1)	Os02g0570400(ENT-KAURENE SYNTHASE 7),Os02g0621300("ECERIFERUM 1),Os03g0262000,Os06g0501900(P-450 76M9),Os07g0519600,Os12g0491800(KAURENE SYNTHASE-LIKE 10)
BP	GO:0019222	regulation of metabolic process	13	15	28	3115	0.6472	0.92688	Os01g0566800(basic helix-loop-helix protein 117),Os01g0952800(basic helix-loop-helix protein 056),Os02g0611500,Os02g0671300(basic helix-loop-helix protein 076),Os03g0251350(HAP5C SUBUNIT OF CCAAT-BOX BINDING COMPLEX),Os03g0798300(METHYLTRANSFERASE 1A),Os06g0108500,Os06g0667200(MADS BOX GENE 30),Os08g0136100(RICE OUTMOST CELL-SPECIFIC GENE 7),Os08g0246800,Os08g0499300(WRKY GENE 30),Os08g0508700(ET…	Os01g0186000(WRKY GENE 10),Os01g0339500(NAC DOMAIN-CONTAINING PROTEIN 30),Os01g0676900,Os02g0564700(basic helix-loop-helix protein 097),Os02g0713700,Os03g0109000(NAC DOMAIN-CONTAINING PROTEIN 55),Os03g0300400(JASMONATE INDUCIBLE PATHOGENESIS-RELATED CLASS 10 PROTEIN),Os03g0771100,Os04g0498900,Os04g0678400(DNA BINDING WITH ONE FINGER 17),Os05g0390800(VQ motif-containing protein 19),Os05g0549800(AP…
BP	GO:0043543	protein acylation	0	1	1	110	0.6494	0.927011	-	Os04g0498900
BP	GO:0071897	DNA biosynthetic process	1	0	1	110	0.6494	0.927011	Os04g0483450	-
BP	GO:0140014	mitotic nuclear division	0	1	1	110	0.6494	0.927011	-	Os04g0498900
CC	GO:0005667	transcription factor complex	1	0	1	121	0.6517	0.928849	Os01g0952800(basic helix-loop-helix protein 056)	-
BP	GO:0030258	lipid modification	0	1	1	111	0.6527	0.928849	-	Os03g0262000
BP	GO:0071702	organic substance transport	3	8	11	1261	0.6528	0.928849	Os03g0282300,Os10g0111700,Os12g0194900("amino acid permease 10B)	Os02g0575900(EXOCYST SUBUNIT EXO70 FAMILY PROTEIN FX6),Os03g0128932,Os03g0197200,Os05g0509500,Os05g0550300("non-specific lipid transfer protein 2.4),Os11g0508600(11N3),Os11g0637100,Os12g0476200(SWEET13)
BP	GO:0032940	secretion by cell	0	1	1	112	0.656	0.931819	-	Os02g0575900(EXOCYST SUBUNIT EXO70 FAMILY PROTEIN FX6)
BP	GO:0006457	protein folding	1	1	2	236	0.6563	0.931819	Os01g0136100(16.9 KDA CLASS I HEAT SHOCK PROTEIN 1)	Os06g0708400(CYCLOPHILIN 19-4)
BP	GO:0009738	abscisic acid-activated signaling pathway	0	1	1	113	0.6593	0.933065	-	Os03g0300400(JASMONATE INDUCIBLE PATHOGENESIS-RELATED CLASS 10 PROTEIN)
BP	GO:0010410	hemicellulose metabolic process	0	1	1	113	0.6593	0.933065	-	Os04g0640700
BP	GO:0044272	sulfur compound biosynthetic process	1	0	1	113	0.6593	0.933065	Os05g0408900(1-DEOXY-D-XYLULOSE 5-PHOSPHATE SYNTHASE 1)	-
BP	GO:0048522	positive regulation of cellular process	5	1	6	710	0.6669	0.9418	Os01g0952800(basic helix-loop-helix protein 056),Os02g0671300(basic helix-loop-helix protein 076),Os06g0108500,Os06g0667200(MADS BOX GENE 30),Os08g0246800	Os02g0564700(basic helix-loop-helix protein 097)
MF	GO:0003743	translation initiation factor activity	1	0	1	107	0.6669	0.9418	Os02g0611500	-
BP	GO:0009628	response to abiotic stimulus	5	2	7	827	0.6705	0.943731	Os01g0136100(16.9 KDA CLASS I HEAT SHOCK PROTEIN 1),Os01g0600900(CHLOROPHYLL A/B BINDING PROTEIN 2R),Os03g0251350(HAP5C SUBUNIT OF CCAAT-BOX BINDING COMPLEX),Os04g0457000("light-harvesting protein CP24),Os08g0246800	Os02g0621300("ECERIFERUM 1),Os09g0110300(cyclase-like 4)
BP	GO:0007059	chromosome segregation	0	1	1	117	0.6721	0.943731	-	Os04g0498900
BP	GO:0071215	cellular response to abscisic acid stimulus	0	1	1	117	0.6721	0.943731	-	Os03g0300400(JASMONATE INDUCIBLE PATHOGENESIS-RELATED CLASS 10 PROTEIN)
BP	GO:0097306	cellular response to alcohol	0	1	1	117	0.6721	0.943731	-	Os03g0300400(JASMONATE INDUCIBLE PATHOGENESIS-RELATED CLASS 10 PROTEIN)
CC	GO:0009579	thylakoid	3	0	3	398	0.6727	0.943731	Os01g0600900(CHLOROPHYLL A/B BINDING PROTEIN 2R),Os04g0457000("light-harvesting protein CP24),Os09g0517000	-
MF	GO:0015405	P-P-bond-hydrolysis-driven transmembrane transporter activity	1	1	2	226	0.67329	0.943731	Os06g0561800(MULTIDRUG RESISTANCE-ASSOCIATED PROTEIN 11)	Os01g0902100(MULTIDRUG RESISTANCE-ASSOCIATED PROTEIN 2)
MF	GO:0033218	amide binding	0	1	1	109	0.6737	0.943731	-	Os06g0708400(CYCLOPHILIN 19-4)
MF	GO:0005488	binding	69	66	135	13478	0.67469	0.943731	Os01g0136100(16.9 KDA CLASS I HEAT SHOCK PROTEIN 1),Os01g0197450,Os01g0566800(basic helix-loop-helix protein 117),Os01g0577300(TRANSCRIPTIONAL ACTIVATOR B),Os01g0600900(CHLOROPHYLL A/B BINDING PROTEIN 2R),Os01g0669100(Large spike S-domain receptor like Kinase 1),Os01g0715900,Os01g0755700,Os01g0806000,Os01g0883000(RECEPTOR-LIKE CYTOPLASMIC KINASE 50),Os01g0952800(basic helix-loop-helix protein 056…	CAA34008,Os01g0115600(RECEPTOR-LIKE CYTOPLASMIC KINASE 11),Os01g0137700,Os01g0162200,Os01g0186000(WRKY GENE 10),Os01g0339500(NAC DOMAIN-CONTAINING PROTEIN 30),Os01g0558100(TAU GLUTATHIONE S-TRANSFERASE 6),Os01g0791033,Os01g0832600,Os01g0902100(MULTIDRUG RESISTANCE-ASSOCIATED PROTEIN 2),Os01g0940800("beta-1),Os02g0564700(basic helix-loop-helix protein 097),Os02g0570400(ENT-KAURENE SYNTHASE 7),Os02…
BP	GO:0008654	phospholipid biosynthetic process	1	0	1	118	0.6752	0.943731	Os02g0142250	-
MF	GO:0015399	primary active transmembrane transporter activity	1	1	2	227	0.67564	0.943731	Os06g0561800(MULTIDRUG RESISTANCE-ASSOCIATED PROTEIN 11)	Os01g0902100(MULTIDRUG RESISTANCE-ASSOCIATED PROTEIN 2)
BP	GO:0048583	regulation of response to stimulus	3	0	3	367	0.6776	0.943731	Os01g0952800(basic helix-loop-helix protein 056),Os03g0251350(HAP5C SUBUNIT OF CCAAT-BOX BINDING COMPLEX),Os04g0401000(PYRICULARIA ORYZAE RESISTANCE 21)	-
BP	GO:0006913	nucleocytoplasmic transport	1	0	1	119	0.6783	0.943731	Os12g0236100	-
BP	GO:0046903	secretion	0	1	1	119	0.6783	0.943731	-	Os02g0575900(EXOCYST SUBUNIT EXO70 FAMILY PROTEIN FX6)
BP	GO:0051169	nuclear transport	1	0	1	119	0.6783	0.943731	Os12g0236100	-
BP	GO:0048518	positive regulation of biological process	5	2	7	834	0.679	0.943731	Os01g0952800(basic helix-loop-helix protein 056),Os02g0671300(basic helix-loop-helix protein 076),Os06g0108500,Os06g0667200(MADS BOX GENE 30),Os08g0246800	Os02g0564700(basic helix-loop-helix protein 097),Os05g0390800(VQ motif-containing protein 19)
BP	GO:0006470	protein dephosphorylation	0	2	2	247	0.6807	0.945098	-	Os02g0607500("protein phosphatase 2C22),Os03g0300400(JASMONATE INDUCIBLE PATHOGENESIS-RELATED CLASS 10 PROTEIN)
MF	GO:0043492	ATPase activity, coupled to movement of substances	1	1	2	230	0.68262	0.946767	Os06g0561800(MULTIDRUG RESISTANCE-ASSOCIATED PROTEIN 11)	Os01g0902100(MULTIDRUG RESISTANCE-ASSOCIATED PROTEIN 2)
BP	GO:0006413	translational initiation	1	0	1	121	0.6844	0.947244	Os02g0611500	-
BP	GO:0040029	regulation of gene expression, epigenetic	0	1	1	121	0.6844	0.947244	-	Os08g0148600
CC	GO:0005615	extracellular space	1	0	1	133	0.6864	0.949016	Os01g0613500	-
MF	GO:0008238	exopeptidase activity	1	0	1	115	0.69326	0.957497	Os11g0461000(SERINE CARBOXYPEPTIDASE 61)	-
MF	GO:0016740	transferase activity	24	23	47	4876	0.69758	0.961163	Os01g0122000("OsPR5),Os01g0669100(Large spike S-domain receptor like Kinase 1),Os01g0755700,Os01g0883000(RECEPTOR-LIKE CYTOPLASMIC KINASE 50),Os02g0142250,Os02g0156000(RECEPTOR-LIKE CYTOPLASMIC KINASE 62),Os03g0636800(NIMA-related kinase 1),Os03g0798300(METHYLTRANSFERASE 1A),Os04g0272200,Os04g0483450,Os04g0606000,Os05g0166300,Os05g0398800,Os05g0408900(1-DEOXY-D-XYLULOSE 5-PHOSPHATE SYNTHASE 1),Os…	Os01g0115600(RECEPTOR-LIKE CYTOPLASMIC KINASE 11),Os01g0558100(TAU GLUTATHIONE S-TRANSFERASE 6),Os02g0247000,Os03g0262000,Os04g0369066(RECEPTOR-LIKE CYTOPLASMIC KINASE 144),Os04g0369100(RECEPTOR-LIKE CYTOPLASMIC KINASE 145),Os04g0498900,Os04g0506800(STLP3),Os04g0526300,Os04g0608900(dual-specificity protein kinase 4),Os06g0273500("leaf senescence protein),Os06g0314600,Os06g0329900,Os07g0131375,Os0…
CC	GO:0009535	chloroplast thylakoid membrane	2	0	2	279	0.6981	0.961163	Os01g0600900(CHLOROPHYLL A/B BINDING PROTEIN 2R),Os04g0457000("light-harvesting protein CP24)	-
CC	GO:0055035	plastid thylakoid membrane	2	0	2	279	0.6981	0.961163	Os01g0600900(CHLOROPHYLL A/B BINDING PROTEIN 2R),Os04g0457000("light-harvesting protein CP24)	-
BP	GO:0045087	innate immune response	0	1	1	127	0.702	0.96337	-	Os11g0598500
BP	GO:0048589	developmental growth	1	0	1	127	0.702	0.96337	Os05g0555600(NADH-DEPENDENT GLUTAMATE SYNTHASE 2)	-
BP	GO:0044264	cellular polysaccharide metabolic process	1	1	2	258	0.7036	0.96337	Os09g0530200(glycoside hydrolase OsGH9B14)	Os02g0247000
BP	GO:0071669	plant-type cell wall organization or biogenesis	1	1	2	258	0.7036	0.96337	Os09g0530200(glycoside hydrolase OsGH9B14)	Os04g0688500(class III peroxidase 62)
BP	GO:0043436	oxoacid metabolic process	3	5	8	971	0.7046	0.96337	Os05g0555600(NADH-DEPENDENT GLUTAMATE SYNTHASE 2),Os09g0294000,Os12g0582700	Os06g0486900("FDH2),Os07g0689600(NICOTIANAMINE SYNTHASE 3),Os09g0110300(cyclase-like 4),Os10g0442400,Os11g0245100(ZETA GLUTATHIONE S-TRANSFERASE 4)
BP	GO:0006082	organic acid metabolic process	3	5	8	973	0.7068	0.96337	Os05g0555600(NADH-DEPENDENT GLUTAMATE SYNTHASE 2),Os09g0294000,Os12g0582700	Os06g0486900("FDH2),Os07g0689600(NICOTIANAMINE SYNTHASE 3),Os09g0110300(cyclase-like 4),Os10g0442400,Os11g0245100(ZETA GLUTATHIONE S-TRANSFERASE 4)
BP	GO:0006643	membrane lipid metabolic process	0	1	1	129	0.7076	0.96337	-	Os02g0621300("ECERIFERUM 1)
BP	GO:0006955	immune response	0	1	1	129	0.7076	0.96337	-	Os11g0598500
BP	GO:0010383	cell wall polysaccharide metabolic process	0	1	1	129	0.7076	0.96337	-	Os04g0640700
CC	GO:0044421	extracellular region part	1	0	1	141	0.7076	0.96337	Os01g0613500	-
BP	GO:0090305	nucleic acid phosphodiester bond hydrolysis	2	4	6	743	0.709	0.96337	Os01g0197450,Os01g0715900	Os07g0588100,Os08g0148600,Os09g0417500,Os09g0538000(RIBONUCLEASE 5)
BP	GO:0009108	coenzyme biosynthetic process	1	0	1	130	0.7104	0.96337	Os02g0258900	-
BP	GO:0009250	glucan biosynthetic process	0	1	1	130	0.7104	0.96337	-	Os02g0247000
BP	GO:0072657	protein localization to membrane	0	1	1	130	0.7104	0.96337	-	Os05g0509500
MF	GO:0008374	O-acyltransferase activity	0	1	1	121	0.71166	0.96337	-	Os06g0273500("leaf senescence protein)
BP	GO:0006869	lipid transport	0	1	1	131	0.7132	0.96337	-	Os05g0550300("non-specific lipid transfer protein 2.4)
MF	GO:0004518	nuclease activity	2	4	6	693	0.71341	0.96337	Os01g0197450,Os01g0715900	Os07g0588100,Os08g0148600,Os09g0417500,Os09g0538000(RIBONUCLEASE 5)
MF	GO:0005509	calcium ion binding	1	2	3	360	0.71353	0.96337	Os02g0734400	Os05g0331200,Os07g0631700
MF	GO:0008289	lipid binding	1	1	2	244	0.71358	0.96337	Os08g0136100(RICE OUTMOST CELL-SPECIFIC GENE 7)	Os03g0300400(JASMONATE INDUCIBLE PATHOGENESIS-RELATED CLASS 10 PROTEIN)
MF	GO:1904680	peptide transmembrane transporter activity	1	0	1	122	0.71461	0.963774	Os10g0111700	-
BP	GO:0006091	generation of precursor metabolites and energy	3	1	4	512	0.7171	0.966144	Os01g0600900(CHLOROPHYLL A/B BINDING PROTEIN 2R),Os04g0457000("light-harvesting protein CP24),Os08g0137400(UCLACYANIN-LIKE PROTEIN 23)	Os10g0442400
BP	GO:2000241	regulation of reproductive process	1	0	1	133	0.7186	0.966865	Os03g0251350(HAP5C SUBUNIT OF CCAAT-BOX BINDING COMPLEX)	-
MF	GO:0004722	protein serine/threonine phosphatase activity	0	1	1	124	0.72044	0.966865	-	Os02g0607500("protein phosphatase 2C22)
MF	GO:0016810	hydrolase activity, acting on carbon-nitrogen (but not peptide) bonds	0	1	1	124	0.72044	0.966865	-	Os09g0110300(cyclase-like 4)
BP	GO:0009414	response to water deprivation	0	1	1	134	0.7213	0.966865	-	Os09g0110300(cyclase-like 4)
BP	GO:0048229	gametophyte development	1	0	1	134	0.7213	0.966865	Os03g0100020(TETRASPANIN 4)	-
MF	GO:0016747	transferase activity, transferring acyl groups other than amino-acyl groups	2	2	4	480	0.72448	0.970141	Os04g0606000,Os11g0461000(SERINE CARBOXYPEPTIDASE 61)	Os04g0498900,Os06g0273500("leaf senescence protein)
MF	GO:0005342	organic acid transmembrane transporter activity	1	0	1	126	0.72615	0.970407	Os12g0194900("amino acid permease 10B)	-
MF	GO:0046943	carboxylic acid transmembrane transporter activity	1	0	1	126	0.72615	0.970407	Os12g0194900("amino acid permease 10B)	-
BP	GO:0007165	signal transduction	10	5	15	1792	0.728	0.971895	Os01g0197450,Os01g0952800(basic helix-loop-helix protein 056),Os02g0156000(RECEPTOR-LIKE CYTOPLASMIC KINASE 62),Os05g0398800,Os06g0188400(Glutamate receptor homolog 4.1),Os07g0117300,Os07g0532500,Os08g0170700,Os08g0246800,Os08g0441100(CALCINEURIN B-LIKE PROTEIN-INTERACTING PROTEIN KINASE 6)	Os03g0300400(JASMONATE INDUCIBLE PATHOGENESIS-RELATED CLASS 10 PROTEIN),Os04g0608900(dual-specificity protein kinase 4),Os07g0131375,Os11g0598500,Os11g0669200(RECEPTOR-LIKE CYTOPLASMIC KINASE 350)
BP	GO:0006401	RNA catabolic process	0	1	1	137	0.7292	0.972512	-	Os09g0538000(RIBONUCLEASE 5)
BP	GO:0002376	immune system process	0	1	1	138	0.7318	0.97401	-	Os11g0598500
BP	GO:0009415	response to water	0	1	1	138	0.7318	0.97401	-	Os09g0110300(cyclase-like 4)
BP	GO:0046496	nicotinamide nucleotide metabolic process	0	1	1	139	0.7343	0.974763	-	Os10g0442400
MF	GO:0042887	amide transmembrane transporter activity	1	0	1	129	0.73449	0.974763	Os10g0111700	-
BP	GO:0023052	signaling	10	5	15	1802	0.7359	0.974763	Os01g0197450,Os01g0952800(basic helix-loop-helix protein 056),Os02g0156000(RECEPTOR-LIKE CYTOPLASMIC KINASE 62),Os05g0398800,Os06g0188400(Glutamate receptor homolog 4.1),Os07g0117300,Os07g0532500,Os08g0170700,Os08g0246800,Os08g0441100(CALCINEURIN B-LIKE PROTEIN-INTERACTING PROTEIN KINASE 6)	Os03g0300400(JASMONATE INDUCIBLE PATHOGENESIS-RELATED CLASS 10 PROTEIN),Os04g0608900(dual-specificity protein kinase 4),Os07g0131375,Os11g0598500,Os11g0669200(RECEPTOR-LIKE CYTOPLASMIC KINASE 350)
BP	GO:0015849	organic acid transport	1	0	1	140	0.7368	0.974763	Os12g0194900("amino acid permease 10B)	-
BP	GO:0019362	pyridine nucleotide metabolic process	0	1	1	140	0.7368	0.974763	-	Os10g0442400
BP	GO:0046942	carboxylic acid transport	1	0	1	140	0.7368	0.974763	Os12g0194900("amino acid permease 10B)	-
BP	GO:0019637	organophosphate metabolic process	3	2	5	649	0.7389	0.975639	Os02g0142250,Os02g0258900,Os05g0408900(1-DEOXY-D-XYLULOSE 5-PHOSPHATE SYNTHASE 1)	Os03g0262000,Os10g0442400
MF	GO:0008026	ATP-dependent helicase activity	1	0	1	131	0.73991	0.975639	Os06g0602400(RNA helicase 52A)	-
MF	GO:0070035	purine NTP-dependent helicase activity	1	0	1	131	0.73991	0.975639	Os06g0602400(RNA helicase 52A)	-
BP	GO:0009408	response to heat	1	0	1	142	0.7418	0.975639	Os01g0136100(16.9 KDA CLASS I HEAT SHOCK PROTEIN 1)	-
BP	GO:0014070	response to organic cyclic compound	0	1	1	142	0.7418	0.975639	-	Os08g0148600
BP	GO:0050793	regulation of developmental process	2	0	2	278	0.7419	0.975639	Os03g0100020(TETRASPANIN 4),Os03g0251350(HAP5C SUBUNIT OF CCAAT-BOX BINDING COMPLEX)	-
BP	GO:0010876	lipid localization	0	1	1	143	0.7443	0.977635	-	Os05g0550300("non-specific lipid transfer protein 2.4)
BP	GO:0071555	cell wall organization	2	1	3	408	0.7449	0.977635	Os07g0607400(PECTIN METHYLESTERASE 20),Os09g0530200(glycoside hydrolase OsGH9B14)	Os04g0688500(class III peroxidase 62)
MF	GO:0001076	transcription factor activity, RNA polymerase II transcription factor binding	0	1	1	134	0.74784	0.980518	-	Os03g0771100
BP	GO:0045454	cell redox homeostasis	1	0	1	145	0.7491	0.981195	Os05g0587300	-
BP	GO:0009451	RNA modification	2	3	5	660	0.7521	0.984147	Os01g0197450,Os01g0715900	Os07g0588100,Os09g0417500,Os10g0442400
BP	GO:1901657	glycosyl compound metabolic process	1	0	1	147	0.7539	0.985524	Os12g0582700	-
BP	GO:0006650	glycerophospholipid metabolic process	0	1	1	148	0.7562	0.987228	-	Os03g0262000
CC	GO:0042651	thylakoid membrane	2	0	2	313	0.7567	0.987228	Os01g0600900(CHLOROPHYLL A/B BINDING PROTEIN 2R),Os04g0457000("light-harvesting protein CP24)	-
BP	GO:0006732	coenzyme metabolic process	1	1	2	289	0.761	0.991857	Os02g0258900	Os10g0442400
MF	GO:0016830	carbon-carbon lyase activity	0	1	1	140	0.76297	0.992632	-	Os02g0621300("ECERIFERUM 1)
BP	GO:0072524	pyridine-containing compound metabolic process	0	1	1	151	0.7631	0.992632	-	Os10g0442400
BP	GO:0048580	regulation of post-embryonic development	1	0	1	154	0.7699	1	Os03g0251350(HAP5C SUBUNIT OF CCAAT-BOX BINDING COMPLEX)	-
BP	GO:0009791	post-embryonic development	3	1	4	554	0.7725	1	Os02g0649900(YELLOW STRIP-LIKE GENE 2),Os03g0251350(HAP5C SUBUNIT OF CCAAT-BOX BINDING COMPLEX),Os09g0530200(glycoside hydrolase OsGH9B14)	Os02g0713700
BP	GO:0009058	biosynthetic process	20	26	46	5284	0.7726	1	Os01g0566800(basic helix-loop-helix protein 117),Os01g0952800(basic helix-loop-helix protein 056),Os02g0142250,Os02g0258900,Os02g0611500,Os02g0671300(basic helix-loop-helix protein 076),Os03g0251350(HAP5C SUBUNIT OF CCAAT-BOX BINDING COMPLEX),Os04g0483450,Os05g0408900(1-DEOXY-D-XYLULOSE 5-PHOSPHATE SYNTHASE 1),Os05g0555600(NADH-DEPENDENT GLUTAMATE SYNTHASE 2),Os06g0108500,Os06g0667200(MADS BOX GE…	Os01g0186000(WRKY GENE 10),Os01g0339500(NAC DOMAIN-CONTAINING PROTEIN 30),Os01g0676900,Os02g0247000,Os02g0564700(basic helix-loop-helix protein 097),Os02g0570400(ENT-KAURENE SYNTHASE 7),Os02g0621300("ECERIFERUM 1),Os02g0713700,Os02g0811800(CINNAMOYL-COA REDUCTASE 10),Os03g0109000(NAC DOMAIN-CONTAINING PROTEIN 55),Os03g0771100,Os04g0498900,Os04g0506800(STLP3),Os04g0678400(DNA BINDING WITH ONE FING…
BP	GO:0099402	plant organ development	1	1	2	296	0.7726	1	Os03g0100020(TETRASPANIN 4)	Os06g0708400(CYCLOPHILIN 19-4)
CC	GO:0034357	photosynthetic membrane	2	0	2	324	0.7734	1	Os01g0600900(CHLOROPHYLL A/B BINDING PROTEIN 2R),Os04g0457000("light-harvesting protein CP24)	-
BP	GO:0051716	cellular response to stimulus	12	11	23	2760	0.7756	1	Os01g0197450,Os01g0952800(basic helix-loop-helix protein 056),Os02g0156000(RECEPTOR-LIKE CYTOPLASMIC KINASE 62),Os02g0240300(class III peroxidase 29),Os05g0398800,Os06g0188400(Glutamate receptor homolog 4.1),Os07g0117300,Os07g0255200,Os07g0532500,Os08g0170700,Os08g0246800,Os08g0441100(CALCINEURIN B-LIKE PROTEIN-INTERACTING PROTEIN KINASE 6)	Os03g0235000(PEROXIDASE N),Os03g0300400(JASMONATE INDUCIBLE PATHOGENESIS-RELATED CLASS 10 PROTEIN),Os04g0498900,Os04g0608900(dual-specificity protein kinase 4),Os04g0688500(class III peroxidase 62),Os07g0131375,Os08g0148600,Os10g0109600(PEROXIDASE A),Os11g0112200(class III peroxidase 131),Os11g0598500,Os11g0669200(RECEPTOR-LIKE CYTOPLASMIC KINASE 350)
BP	GO:0045229	external encapsulating structure organization	2	1	3	430	0.7762	1	Os07g0607400(PECTIN METHYLESTERASE 20),Os09g0530200(glycoside hydrolase OsGH9B14)	Os04g0688500(class III peroxidase 62)
CC	GO:0005802	trans-Golgi network	0	1	1	172	0.7772	1	-	Os06g0708400(CYCLOPHILIN 19-4)
BP	GO:0006260	DNA replication	0	1	1	158	0.7785	1	-	Os04g0498900
MF	GO:0016746	transferase activity, transferring acyl groups	2	2	4	521	0.78123	1	Os04g0606000,Os11g0461000(SERINE CARBOXYPEPTIDASE 61)	Os04g0498900,Os06g0273500("leaf senescence protein)
BP	GO:0006733	oxidoreduction coenzyme metabolic process	0	1	1	162	0.7868	1	-	Os10g0442400
BP	GO:0016070	RNA metabolic process	14	18	32	3782	0.7874	1	Os01g0197450,Os01g0566800(basic helix-loop-helix protein 117),Os01g0715900,Os01g0952800(basic helix-loop-helix protein 056),Os02g0671300(basic helix-loop-helix protein 076),Os03g0251350(HAP5C SUBUNIT OF CCAAT-BOX BINDING COMPLEX),Os06g0108500,Os06g0602400(RNA helicase 52A),Os06g0667200(MADS BOX GENE 30),Os08g0136100(RICE OUTMOST CELL-SPECIFIC GENE 7),Os08g0246800,Os08g0499300(WRKY GENE 30),Os08g0…	CAA34008,Os01g0186000(WRKY GENE 10),Os01g0339500(NAC DOMAIN-CONTAINING PROTEIN 30),Os01g0676900,Os02g0564700(basic helix-loop-helix protein 097),Os02g0713700,Os03g0109000(NAC DOMAIN-CONTAINING PROTEIN 55),Os03g0771100,Os04g0678400(DNA BINDING WITH ONE FINGER 17),Os05g0390800(VQ motif-containing protein 19),Os05g0549800(APETALA2/ETHYLENE-RESPONSIVE ELEMENT BINDING PROTEIN 96),Os07g0588100,Os07g062…
BP	GO:0019752	carboxylic acid metabolic process	2	5	7	936	0.7876	1	Os05g0555600(NADH-DEPENDENT GLUTAMATE SYNTHASE 2),Os09g0294000	Os06g0486900("FDH2),Os07g0689600(NICOTIANAMINE SYNTHASE 3),Os09g0110300(cyclase-like 4),Os10g0442400,Os11g0245100(ZETA GLUTATHIONE S-TRANSFERASE 4)
CC	GO:0009941	chloroplast envelope	2	0	2	334	0.7878	1	Os01g0600900(CHLOROPHYLL A/B BINDING PROTEIN 2R),Os04g0457000("light-harvesting protein CP24)	-
CC	GO:0044436	thylakoid part	2	0	2	334	0.7878	1	Os01g0600900(CHLOROPHYLL A/B BINDING PROTEIN 2R),Os04g0457000("light-harvesting protein CP24)	-
BP	GO:0033993	response to lipid	0	2	2	307	0.7898	1	-	Os02g0621300("ECERIFERUM 1),Os03g0300400(JASMONATE INDUCIBLE PATHOGENESIS-RELATED CLASS 10 PROTEIN)
BP	GO:0016311	dephosphorylation	1	2	3	441	0.7906	1	Os01g0191200	Os02g0607500("protein phosphatase 2C22),Os03g0300400(JASMONATE INDUCIBLE PATHOGENESIS-RELATED CLASS 10 PROTEIN)
MF	GO:0140098	catalytic activity, acting on RNA	1	3	4	529	0.79116	1	Os06g0602400(RNA helicase 52A)	Os08g0148600,Os09g0538000(RIBONUCLEASE 5),Os10g0442400
BP	GO:0071103	DNA conformation change	1	0	1	168	0.7988	1	Os07g0255200	-
BP	GO:0033692	cellular polysaccharide biosynthetic process	0	1	1	169	0.8007	1	-	Os02g0247000
MF	GO:0003682	chromatin binding	1	0	1	157	0.80113	1	Os03g0798300(METHYLTRANSFERASE 1A)	-
BP	GO:0034655	nucleobase-containing compound catabolic process	0	1	1	170	0.8026	1	-	Os09g0538000(RIBONUCLEASE 5)
CC	GO:0009526	plastid envelope	2	0	2	345	0.8026	1	Os01g0600900(CHLOROPHYLL A/B BINDING PROTEIN 2R),Os04g0457000("light-harvesting protein CP24)	-
BP	GO:0016053	organic acid biosynthetic process	2	1	3	454	0.8067	1	Os05g0555600(NADH-DEPENDENT GLUTAMATE SYNTHASE 2),Os09g0294000	Os07g0689600(NICOTIANAMINE SYNTHASE 3)
BP	GO:0046394	carboxylic acid biosynthetic process	2	1	3	454	0.8067	1	Os05g0555600(NADH-DEPENDENT GLUTAMATE SYNTHASE 2),Os09g0294000	Os07g0689600(NICOTIANAMINE SYNTHASE 3)
BP	GO:1901360	organic cyclic compound metabolic process	20	25	45	5257	0.8098	1	Os01g0197450,Os01g0566800(basic helix-loop-helix protein 117),Os01g0715900,Os01g0952800(basic helix-loop-helix protein 056),Os02g0258900,Os02g0671300(basic helix-loop-helix protein 076),Os03g0251350(HAP5C SUBUNIT OF CCAAT-BOX BINDING COMPLEX),Os03g0798300(METHYLTRANSFERASE 1A),Os04g0483450,Os05g0408900(1-DEOXY-D-XYLULOSE 5-PHOSPHATE SYNTHASE 1),Os06g0108500,Os06g0602400(RNA helicase 52A),Os06g066…	CAA34008,Os01g0186000(WRKY GENE 10),Os01g0339500(NAC DOMAIN-CONTAINING PROTEIN 30),Os01g0676900,Os02g0564700(basic helix-loop-helix protein 097),Os02g0713700,Os02g0811800(CINNAMOYL-COA REDUCTASE 10),Os03g0109000(NAC DOMAIN-CONTAINING PROTEIN 55),Os03g0771100,Os04g0498900,Os04g0678400(DNA BINDING WITH ONE FINGER 17),Os05g0390800(VQ motif-containing protein 19),Os05g0549800(APETALA2/ETHYLENE-RESPON…
BP	GO:0044283	small molecule biosynthetic process	3	1	4	588	0.8109	1	Os05g0408900(1-DEOXY-D-XYLULOSE 5-PHOSPHATE SYNTHASE 1),Os05g0555600(NADH-DEPENDENT GLUTAMATE SYNTHASE 2),Os09g0294000	Os07g0689600(NICOTIANAMINE SYNTHASE 3)
MF	GO:0008514	organic anion transmembrane transporter activity	1	0	1	162	0.81114	1	Os12g0194900("amino acid permease 10B)	-
MF	GO:0140101	catalytic activity, acting on a tRNA	0	1	1	162	0.81114	1	-	Os10g0442400
BP	GO:0009966	regulation of signal transduction	1	0	1	175	0.8118	1	Os01g0952800(basic helix-loop-helix protein 056)	-
BP	GO:0046486	glycerolipid metabolic process	0	1	1	175	0.8118	1	-	Os03g0262000
BP	GO:0023051	regulation of signaling	1	0	1	176	0.8136	1	Os01g0952800(basic helix-loop-helix protein 056)	-
BP	GO:0010646	regulation of cell communication	1	0	1	177	0.8154	1	Os01g0952800(basic helix-loop-helix protein 056)	-
MF	GO:0008135	translation factor activity, RNA binding	1	0	1	165	0.81691	1	Os02g0611500	-
BP	GO:0006417	regulation of translation	1	0	1	178	0.8172	1	Os02g0611500	-
BP	GO:0080134	regulation of response to stress	1	0	1	179	0.8189	1	Os04g0401000(PYRICULARIA ORYZAE RESISTANCE 21)	-
BP	GO:0046034	ATP metabolic process	0	1	1	180	0.8206	1	-	Os10g0442400
BP	GO:1901576	organic substance biosynthetic process	19	23	42	4956	0.8213	1	Os01g0566800(basic helix-loop-helix protein 117),Os01g0952800(basic helix-loop-helix protein 056),Os02g0142250,Os02g0258900,Os02g0611500,Os02g0671300(basic helix-loop-helix protein 076),Os03g0251350(HAP5C SUBUNIT OF CCAAT-BOX BINDING COMPLEX),Os04g0483450,Os05g0408900(1-DEOXY-D-XYLULOSE 5-PHOSPHATE SYNTHASE 1),Os05g0555600(NADH-DEPENDENT GLUTAMATE SYNTHASE 2),Os06g0108500,Os06g0667200(MADS BOX GE…	Os01g0186000(WRKY GENE 10),Os01g0339500(NAC DOMAIN-CONTAINING PROTEIN 30),Os01g0676900,Os02g0247000,Os02g0564700(basic helix-loop-helix protein 097),Os02g0570400(ENT-KAURENE SYNTHASE 7),Os02g0621300("ECERIFERUM 1),Os02g0713700,Os02g0811800(CINNAMOYL-COA REDUCTASE 10),Os03g0109000(NAC DOMAIN-CONTAINING PROTEIN 55),Os03g0771100,Os04g0498900,Os04g0506800(STLP3),Os04g0678400(DNA BINDING WITH ONE FING…
BP	GO:0009888	tissue development	1	0	1	181	0.8223	1	Os03g0100020(TETRASPANIN 4)	-
BP	GO:1901617	organic hydroxy compound biosynthetic process	0	1	1	183	0.8257	1	-	Os07g0519600
BP	GO:0044249	cellular biosynthetic process	19	22	41	4858	0.8262	1	Os01g0566800(basic helix-loop-helix protein 117),Os01g0952800(basic helix-loop-helix protein 056),Os02g0142250,Os02g0258900,Os02g0611500,Os02g0671300(basic helix-loop-helix protein 076),Os03g0251350(HAP5C SUBUNIT OF CCAAT-BOX BINDING COMPLEX),Os04g0483450,Os05g0408900(1-DEOXY-D-XYLULOSE 5-PHOSPHATE SYNTHASE 1),Os05g0555600(NADH-DEPENDENT GLUTAMATE SYNTHASE 2),Os06g0108500,Os06g0667200(MADS BOX GE…	Os01g0186000(WRKY GENE 10),Os01g0339500(NAC DOMAIN-CONTAINING PROTEIN 30),Os01g0676900,Os02g0247000,Os02g0564700(basic helix-loop-helix protein 097),Os02g0570400(ENT-KAURENE SYNTHASE 7),Os02g0621300("ECERIFERUM 1),Os02g0713700,Os02g0811800(CINNAMOYL-COA REDUCTASE 10),Os03g0109000(NAC DOMAIN-CONTAINING PROTEIN 55),Os03g0771100,Os04g0498900,Os04g0506800(STLP3),Os04g0678400(DNA BINDING WITH ONE FING…
CC	GO:0098791	Golgi subcompartment	0	2	2	364	0.8262	1	-	Os04g0506800(STLP3),Os06g0708400(CYCLOPHILIN 19-4)
BP	GO:1901564	organonitrogen compound metabolic process	30	24	54	6281	0.8284	1	Os01g0122000("OsPR5),Os01g0600900(CHLOROPHYLL A/B BINDING PROTEIN 2R),Os01g0613500,Os01g0669100(Large spike S-domain receptor like Kinase 1),Os01g0727840("Subtilisin 3),Os01g0755700,Os01g0806000,Os01g0883000(RECEPTOR-LIKE CYTOPLASMIC KINASE 50),Os01g0952800(basic helix-loop-helix protein 056),Os02g0142250,Os02g0156000(RECEPTOR-LIKE CYTOPLASMIC KINASE 62),Os02g0258900,Os02g0611500,Os03g0636800(NIM…	Os01g0115600(RECEPTOR-LIKE CYTOPLASMIC KINASE 11),Os01g0558100(TAU GLUTATHIONE S-TRANSFERASE 6),Os02g0607500("protein phosphatase 2C22),Os02g0621300("ECERIFERUM 1),Os03g0300400(JASMONATE INDUCIBLE PATHOGENESIS-RELATED CLASS 10 PROTEIN),Os04g0369066(RECEPTOR-LIKE CYTOPLASMIC KINASE 144),Os04g0369100(RECEPTOR-LIKE CYTOPLASMIC KINASE 145),Os04g0498900,Os04g0506800(STLP3),Os04g0608900(dual-specificit…
BP	GO:0043412	macromolecule modification	18	16	34	4091	0.8287	1	Os01g0122000("OsPR5),Os01g0197450,Os01g0600900(CHLOROPHYLL A/B BINDING PROTEIN 2R),Os01g0669100(Large spike S-domain receptor like Kinase 1),Os01g0715900,Os01g0755700,Os01g0883000(RECEPTOR-LIKE CYTOPLASMIC KINASE 50),Os02g0142250,Os02g0156000(RECEPTOR-LIKE CYTOPLASMIC KINASE 62),Os03g0636800(NIMA-related kinase 1),Os03g0798300(METHYLTRANSFERASE 1A),Os04g0457000("light-harvesting protein CP24),Os0…	Os01g0115600(RECEPTOR-LIKE CYTOPLASMIC KINASE 11),Os02g0607500("protein phosphatase 2C22),Os03g0300400(JASMONATE INDUCIBLE PATHOGENESIS-RELATED CLASS 10 PROTEIN),Os04g0369066(RECEPTOR-LIKE CYTOPLASMIC KINASE 144),Os04g0369100(RECEPTOR-LIKE CYTOPLASMIC KINASE 145),Os04g0498900,Os04g0506800(STLP3),Os04g0608900(dual-specificity protein kinase 4),Os06g0708400(CYCLOPHILIN 19-4),Os07g0131375,Os07g05881…
BP	GO:0098656	anion transmembrane transport	1	0	1	185	0.829	1	Os12g0194900("amino acid permease 10B)	-
BP	GO:0006464	cellular protein modification process	15	13	28	3423	0.8294	1	Os01g0122000("OsPR5),Os01g0600900(CHLOROPHYLL A/B BINDING PROTEIN 2R),Os01g0669100(Large spike S-domain receptor like Kinase 1),Os01g0755700,Os01g0883000(RECEPTOR-LIKE CYTOPLASMIC KINASE 50),Os02g0142250,Os02g0156000(RECEPTOR-LIKE CYTOPLASMIC KINASE 62),Os03g0636800(NIMA-related kinase 1),Os04g0457000("light-harvesting protein CP24),Os05g0166300,Os05g0398800,Os07g0537500,Os08g0179000,Os08g0441100…	Os01g0115600(RECEPTOR-LIKE CYTOPLASMIC KINASE 11),Os02g0607500("protein phosphatase 2C22),Os03g0300400(JASMONATE INDUCIBLE PATHOGENESIS-RELATED CLASS 10 PROTEIN),Os04g0369066(RECEPTOR-LIKE CYTOPLASMIC KINASE 144),Os04g0369100(RECEPTOR-LIKE CYTOPLASMIC KINASE 145),Os04g0498900,Os04g0506800(STLP3),Os04g0608900(dual-specificity protein kinase 4),Os06g0708400(CYCLOPHILIN 19-4),Os07g0131375,Os08g02308…
BP	GO:0036211	protein modification process	15	13	28	3423	0.8294	1	Os01g0122000("OsPR5),Os01g0600900(CHLOROPHYLL A/B BINDING PROTEIN 2R),Os01g0669100(Large spike S-domain receptor like Kinase 1),Os01g0755700,Os01g0883000(RECEPTOR-LIKE CYTOPLASMIC KINASE 50),Os02g0142250,Os02g0156000(RECEPTOR-LIKE CYTOPLASMIC KINASE 62),Os03g0636800(NIMA-related kinase 1),Os04g0457000("light-harvesting protein CP24),Os05g0166300,Os05g0398800,Os07g0537500,Os08g0179000,Os08g0441100…	Os01g0115600(RECEPTOR-LIKE CYTOPLASMIC KINASE 11),Os02g0607500("protein phosphatase 2C22),Os03g0300400(JASMONATE INDUCIBLE PATHOGENESIS-RELATED CLASS 10 PROTEIN),Os04g0369066(RECEPTOR-LIKE CYTOPLASMIC KINASE 144),Os04g0369100(RECEPTOR-LIKE CYTOPLASMIC KINASE 145),Os04g0498900,Os04g0506800(STLP3),Os04g0608900(dual-specificity protein kinase 4),Os06g0708400(CYCLOPHILIN 19-4),Os07g0131375,Os08g02308…
BP	GO:0018193	peptidyl-amino acid modification	1	2	3	475	0.8304	1	Os08g0441100(CALCINEURIN B-LIKE PROTEIN-INTERACTING PROTEIN KINASE 6)	Os04g0506800(STLP3),Os06g0708400(CYCLOPHILIN 19-4)
CC	GO:0098805	whole membrane	2	1	3	519	0.8305	1	Os01g0232000(TONOPLAST INTRINSIC PROTEIN 4;3),Os06g0561800(MULTIDRUG RESISTANCE-ASSOCIATED PROTEIN 11)	Os01g0902100(MULTIDRUG RESISTANCE-ASSOCIATED PROTEIN 2)
BP	GO:0048316	seed development	1	0	1	186	0.8307	1	Os02g0649900(YELLOW STRIP-LIKE GENE 2)	-
BP	GO:0035556	intracellular signal transduction	2	1	3	478	0.8336	1	Os01g0952800(basic helix-loop-helix protein 056),Os08g0441100(CALCINEURIN B-LIKE PROTEIN-INTERACTING PROTEIN KINASE 6)	Os04g0608900(dual-specificity protein kinase 4)
BP	GO:0071396	cellular response to lipid	0	1	1	188	0.8339	1	-	Os03g0300400(JASMONATE INDUCIBLE PATHOGENESIS-RELATED CLASS 10 PROTEIN)
BP	GO:0009205	purine ribonucleoside triphosphate metabolic process	0	1	1	190	0.837	1	-	Os10g0442400
BP	GO:0009144	purine nucleoside triphosphate metabolic process	0	1	1	191	0.8386	1	-	Os10g0442400
BP	GO:0034645	cellular macromolecule biosynthetic process	15	15	30	3671	0.84	1	Os01g0566800(basic helix-loop-helix protein 117),Os01g0952800(basic helix-loop-helix protein 056),Os02g0142250,Os02g0611500,Os02g0671300(basic helix-loop-helix protein 076),Os03g0251350(HAP5C SUBUNIT OF CCAAT-BOX BINDING COMPLEX),Os04g0483450,Os06g0108500,Os06g0667200(MADS BOX GENE 30),Os08g0136100(RICE OUTMOST CELL-SPECIFIC GENE 7),Os08g0246800,Os08g0499300(WRKY GENE 30),Os08g0508700(ETHYLENE IN…	Os01g0186000(WRKY GENE 10),Os01g0339500(NAC DOMAIN-CONTAINING PROTEIN 30),Os01g0676900,Os02g0247000,Os02g0564700(basic helix-loop-helix protein 097),Os02g0713700,Os03g0109000(NAC DOMAIN-CONTAINING PROTEIN 55),Os03g0771100,Os04g0498900,Os04g0506800(STLP3),Os04g0678400(DNA BINDING WITH ONE FINGER 17),Os05g0390800(VQ motif-containing protein 19),Os05g0549800(APETALA2/ETHYLENE-RESPONSIVE ELEMENT BIND…
MF	GO:0052689	carboxylic ester hydrolase activity	1	0	1	179	0.84158	1	Os07g0607400(PECTIN METHYLESTERASE 20)	-
BP	GO:0040007	growth	1	0	1	193	0.8417	1	Os05g0555600(NADH-DEPENDENT GLUTAMATE SYNTHASE 2)	-
BP	GO:0000280	nuclear division	0	1	1	195	0.8447	1	-	Os04g0498900
BP	GO:0051301	cell division	0	1	1	195	0.8447	1	-	Os04g0498900
MF	GO:0003924	GTPase activity	0	1	1	181	0.84482	1	-	Os05g0509500
BP	GO:0090304	nucleic acid metabolic process	17	19	36	4354	0.8458	1	Os01g0197450,Os01g0566800(basic helix-loop-helix protein 117),Os01g0715900,Os01g0952800(basic helix-loop-helix protein 056),Os02g0671300(basic helix-loop-helix protein 076),Os03g0251350(HAP5C SUBUNIT OF CCAAT-BOX BINDING COMPLEX),Os03g0798300(METHYLTRANSFERASE 1A),Os04g0483450,Os06g0108500,Os06g0602400(RNA helicase 52A),Os06g0667200(MADS BOX GENE 30),Os07g0255200,Os08g0136100(RICE OUTMOST CELL-SP…	CAA34008,Os01g0186000(WRKY GENE 10),Os01g0339500(NAC DOMAIN-CONTAINING PROTEIN 30),Os01g0676900,Os02g0564700(basic helix-loop-helix protein 097),Os02g0713700,Os03g0109000(NAC DOMAIN-CONTAINING PROTEIN 55),Os03g0771100,Os04g0498900,Os04g0678400(DNA BINDING WITH ONE FINGER 17),Os05g0390800(VQ motif-containing protein 19),Os05g0549800(APETALA2/ETHYLENE-RESPONSIVE ELEMENT BINDING PROTEIN 96),Os07g058…
BP	GO:0050789	regulation of biological process	24	19	43	5128	0.8461	1	Os01g0197450,Os01g0566800(basic helix-loop-helix protein 117),Os01g0952800(basic helix-loop-helix protein 056),Os02g0156000(RECEPTOR-LIKE CYTOPLASMIC KINASE 62),Os02g0611500,Os02g0671300(basic helix-loop-helix protein 076),Os03g0100020(TETRASPANIN 4),Os03g0251350(HAP5C SUBUNIT OF CCAAT-BOX BINDING COMPLEX),Os03g0798300(METHYLTRANSFERASE 1A),Os04g0401000(PYRICULARIA ORYZAE RESISTANCE 21),Os05g0398…	Os01g0186000(WRKY GENE 10),Os01g0339500(NAC DOMAIN-CONTAINING PROTEIN 30),Os01g0676900,Os02g0564700(basic helix-loop-helix protein 097),Os02g0713700,Os03g0109000(NAC DOMAIN-CONTAINING PROTEIN 55),Os03g0300400(JASMONATE INDUCIBLE PATHOGENESIS-RELATED CLASS 10 PROTEIN),Os03g0771100,Os04g0498900,Os04g0608900(dual-specificity protein kinase 4),Os04g0678400(DNA BINDING WITH ONE FINGER 17),Os05g0390800…
BP	GO:0006281	DNA repair	1	1	2	350	0.8465	1	Os07g0255200	Os04g0498900
BP	GO:2000026	regulation of multicellular organismal development	1	0	1	197	0.8476	1	Os03g0251350(HAP5C SUBUNIT OF CCAAT-BOX BINDING COMPLEX)	-
CC	GO:0044434	chloroplast part	5	0	5	829	0.8494	1	Os01g0600900(CHLOROPHYLL A/B BINDING PROTEIN 2R),Os04g0457000("light-harvesting protein CP24),Os05g0408900(1-DEOXY-D-XYLULOSE 5-PHOSPHATE SYNTHASE 1),Os09g0294000,Os09g0517000	-
MF	GO:0097367	carbohydrate derivative binding	16	15	31	3548	0.85306	1	Os01g0669100(Large spike S-domain receptor like Kinase 1),Os01g0883000(RECEPTOR-LIKE CYTOPLASMIC KINASE 50),Os02g0156000(RECEPTOR-LIKE CYTOPLASMIC KINASE 62),Os03g0636800(NIMA-related kinase 1),Os05g0166300,Os05g0398800,Os05g0555600(NADH-DEPENDENT GLUTAMATE SYNTHASE 2),Os06g0561800(MULTIDRUG RESISTANCE-ASSOCIATED PROTEIN 11),Os06g0602400(RNA helicase 52A),Os07g0117300,Os07g0255200,Os07g0537500,Os…	Os01g0115600(RECEPTOR-LIKE CYTOPLASMIC KINASE 11),Os01g0902100(MULTIDRUG RESISTANCE-ASSOCIATED PROTEIN 2),Os03g0262000,Os03g0347900,Os04g0369066(RECEPTOR-LIKE CYTOPLASMIC KINASE 144),Os04g0369100(RECEPTOR-LIKE CYTOPLASMIC KINASE 145),Os04g0608900(dual-specificity protein kinase 4),Os05g0509500,Os06g0726100(CHITINASE 3),Os07g0131375,Os11g0548600(lysin motif-containing protein 2),Os11g0590900,Os11g…
BP	GO:1901566	organonitrogen compound biosynthetic process	8	4	12	1628	0.8532	1	Os01g0952800(basic helix-loop-helix protein 056),Os02g0142250,Os02g0258900,Os02g0611500,Os05g0408900(1-DEOXY-D-XYLULOSE 5-PHOSPHATE SYNTHASE 1),Os05g0555600(NADH-DEPENDENT GLUTAMATE SYNTHASE 2),Os09g0294000,Os10g0459300	Os02g0621300("ECERIFERUM 1),Os04g0506800(STLP3),Os07g0689600(NICOTIANAMINE SYNTHASE 3),Os09g0344500("O-methyltransferase ZRP4)
BP	GO:0000271	polysaccharide biosynthetic process	0	1	1	201	0.8534	1	-	Os02g0247000
BP	GO:0009199	ribonucleoside triphosphate metabolic process	0	1	1	201	0.8534	1	-	Os10g0442400
MF	GO:0008270	zinc ion binding	5	1	6	829	0.85369	1	Os01g0755700,Os05g0296200,Os05g0305200,Os08g0246800,Os10g0486300	Os07g0588100
BP	GO:0046483	heterocycle metabolic process	20	22	42	5040	0.8543	1	Os01g0197450,Os01g0566800(basic helix-loop-helix protein 117),Os01g0715900,Os01g0952800(basic helix-loop-helix protein 056),Os02g0258900,Os02g0671300(basic helix-loop-helix protein 076),Os03g0251350(HAP5C SUBUNIT OF CCAAT-BOX BINDING COMPLEX),Os03g0798300(METHYLTRANSFERASE 1A),Os04g0483450,Os05g0408900(1-DEOXY-D-XYLULOSE 5-PHOSPHATE SYNTHASE 1),Os06g0108500,Os06g0602400(RNA helicase 52A),Os06g066…	CAA34008,Os01g0186000(WRKY GENE 10),Os01g0339500(NAC DOMAIN-CONTAINING PROTEIN 30),Os01g0676900,Os02g0564700(basic helix-loop-helix protein 097),Os02g0713700,Os03g0109000(NAC DOMAIN-CONTAINING PROTEIN 55),Os03g0771100,Os04g0498900,Os04g0678400(DNA BINDING WITH ONE FINGER 17),Os05g0390800(VQ motif-containing protein 19),Os05g0549800(APETALA2/ETHYLENE-RESPONSIVE ELEMENT BINDING PROTEIN 96),Os07g058…
BP	GO:0071822	protein complex subunit organization	2	0	2	358	0.8554	1	Os01g0136100(16.9 KDA CLASS I HEAT SHOCK PROTEIN 1),Os12g0236100	-
MF	GO:0015197	peptide transporter activity	1	0	1	188	0.85566	1	Os10g0111700	-
BP	GO:0006310	DNA recombination	1	0	1	203	0.8562	1	Os07g0255200	-
MF	GO:0004721	phosphoprotein phosphatase activity	0	1	1	190	0.85861	1	-	Os02g0607500("protein phosphatase 2C22)
BP	GO:0009126	purine nucleoside monophosphate metabolic process	0	1	1	206	0.8603	1	-	Os10g0442400
BP	GO:0009167	purine ribonucleoside monophosphate metabolic process	0	1	1	206	0.8603	1	-	Os10g0442400
BP	GO:0022402	cell cycle process	1	1	2	363	0.8607	1	Os03g0100020(TETRASPANIN 4)	Os04g0498900
CC	GO:0044435	plastid part	5	0	5	845	0.8607	1	Os01g0600900(CHLOROPHYLL A/B BINDING PROTEIN 2R),Os04g0457000("light-harvesting protein CP24),Os05g0408900(1-DEOXY-D-XYLULOSE 5-PHOSPHATE SYNTHASE 1),Os09g0294000,Os09g0517000	-
BP	GO:0050794	regulation of cellular process	21	18	39	4727	0.861	1	Os01g0197450,Os01g0566800(basic helix-loop-helix protein 117),Os01g0952800(basic helix-loop-helix protein 056),Os02g0156000(RECEPTOR-LIKE CYTOPLASMIC KINASE 62),Os02g0611500,Os02g0671300(basic helix-loop-helix protein 076),Os03g0251350(HAP5C SUBUNIT OF CCAAT-BOX BINDING COMPLEX),Os05g0398800,Os05g0587300,Os06g0108500,Os06g0188400(Glutamate receptor homolog 4.1),Os06g0667200(MADS BOX GENE 30),Os07…	Os01g0186000(WRKY GENE 10),Os01g0339500(NAC DOMAIN-CONTAINING PROTEIN 30),Os01g0676900,Os02g0564700(basic helix-loop-helix protein 097),Os02g0713700,Os03g0109000(NAC DOMAIN-CONTAINING PROTEIN 55),Os03g0300400(JASMONATE INDUCIBLE PATHOGENESIS-RELATED CLASS 10 PROTEIN),Os03g0771100,Os04g0498900,Os04g0608900(dual-specificity protein kinase 4),Os04g0678400(DNA BINDING WITH ONE FINGER 17),Os05g0390800…
CC	GO:0005768	endosome	0	1	1	226	0.8613	1	-	Os06g0708400(CYCLOPHILIN 19-4)
BP	GO:0009141	nucleoside triphosphate metabolic process	0	1	1	209	0.8642	1	-	Os10g0442400
BP	GO:0009059	macromolecule biosynthetic process	15	15	30	3739	0.8675	1	Os01g0566800(basic helix-loop-helix protein 117),Os01g0952800(basic helix-loop-helix protein 056),Os02g0142250,Os02g0611500,Os02g0671300(basic helix-loop-helix protein 076),Os03g0251350(HAP5C SUBUNIT OF CCAAT-BOX BINDING COMPLEX),Os04g0483450,Os06g0108500,Os06g0667200(MADS BOX GENE 30),Os08g0136100(RICE OUTMOST CELL-SPECIFIC GENE 7),Os08g0246800,Os08g0499300(WRKY GENE 30),Os08g0508700(ETHYLENE IN…	Os01g0186000(WRKY GENE 10),Os01g0339500(NAC DOMAIN-CONTAINING PROTEIN 30),Os01g0676900,Os02g0247000,Os02g0564700(basic helix-loop-helix protein 097),Os02g0713700,Os03g0109000(NAC DOMAIN-CONTAINING PROTEIN 55),Os03g0771100,Os04g0498900,Os04g0506800(STLP3),Os04g0678400(DNA BINDING WITH ONE FINGER 17),Os05g0390800(VQ motif-containing protein 19),Os05g0549800(APETALA2/ETHYLENE-RESPONSIVE ELEMENT BIND…
MF	GO:0000166	nucleotide binding	19	14	33	3794	0.868	1	Os01g0669100(Large spike S-domain receptor like Kinase 1),Os01g0883000(RECEPTOR-LIKE CYTOPLASMIC KINASE 50),Os02g0156000(RECEPTOR-LIKE CYTOPLASMIC KINASE 62),Os03g0636800(NIMA-related kinase 1),Os04g0223500,Os05g0166300,Os05g0398800,Os05g0555600(NADH-DEPENDENT GLUTAMATE SYNTHASE 2),Os06g0561800(MULTIDRUG RESISTANCE-ASSOCIATED PROTEIN 11),Os06g0602400(RNA helicase 52A),Os07g0117300,Os07g0255200,Os…	Os01g0115600(RECEPTOR-LIKE CYTOPLASMIC KINASE 11),Os01g0902100(MULTIDRUG RESISTANCE-ASSOCIATED PROTEIN 2),Os03g0262000,Os03g0347900,Os04g0369066(RECEPTOR-LIKE CYTOPLASMIC KINASE 144),Os04g0369100(RECEPTOR-LIKE CYTOPLASMIC KINASE 145),Os04g0608900(dual-specificity protein kinase 4),Os05g0509500,Os06g0486900("FDH2),Os07g0131375,Os11g0548600(lysin motif-containing protein 2),Os11g0590900,Os11g059850…
MF	GO:1901265	nucleoside phosphate binding	19	14	33	3794	0.868	1	Os01g0669100(Large spike S-domain receptor like Kinase 1),Os01g0883000(RECEPTOR-LIKE CYTOPLASMIC KINASE 50),Os02g0156000(RECEPTOR-LIKE CYTOPLASMIC KINASE 62),Os03g0636800(NIMA-related kinase 1),Os04g0223500,Os05g0166300,Os05g0398800,Os05g0555600(NADH-DEPENDENT GLUTAMATE SYNTHASE 2),Os06g0561800(MULTIDRUG RESISTANCE-ASSOCIATED PROTEIN 11),Os06g0602400(RNA helicase 52A),Os07g0117300,Os07g0255200,Os…	Os01g0115600(RECEPTOR-LIKE CYTOPLASMIC KINASE 11),Os01g0902100(MULTIDRUG RESISTANCE-ASSOCIATED PROTEIN 2),Os03g0262000,Os03g0347900,Os04g0369066(RECEPTOR-LIKE CYTOPLASMIC KINASE 144),Os04g0369100(RECEPTOR-LIKE CYTOPLASMIC KINASE 145),Os04g0608900(dual-specificity protein kinase 4),Os05g0509500,Os06g0486900("FDH2),Os07g0131375,Os11g0548600(lysin motif-containing protein 2),Os11g0590900,Os11g059850…
BP	GO:0034637	cellular carbohydrate biosynthetic process	0	1	1	212	0.8681	1	-	Os02g0247000
MF	GO:0003729	mRNA binding	1	0	1	197	0.86849	1	Os02g0611500	-
BP	GO:0071310	cellular response to organic substance	1	2	3	517	0.8705	1	Os01g0952800(basic helix-loop-helix protein 056)	Os03g0300400(JASMONATE INDUCIBLE PATHOGENESIS-RELATED CLASS 10 PROTEIN),Os08g0148600
BP	GO:0006605	protein targeting	0	1	1	214	0.8706	1	-	Os05g0509500
BP	GO:0044093	positive regulation of molecular function	0	1	1	214	0.8706	1	-	Os05g0390800(VQ motif-containing protein 19)
BP	GO:1903047	mitotic cell cycle process	0	1	1	214	0.8706	1	-	Os04g0498900
BP	GO:0043086	negative regulation of catalytic activity	0	1	1	216	0.8731	1	-	Os03g0300400(JASMONATE INDUCIBLE PATHOGENESIS-RELATED CLASS 10 PROTEIN)
BP	GO:0006508	proteolysis	10	1	11	1545	0.8735	1	Os01g0122000("OsPR5),Os01g0613500,Os01g0727840("Subtilisin 3),Os01g0755700,Os01g0806000,Os07g0108100,Os07g0532500,Os07g0533300,Os11g0461000(SERINE CARBOXYPEPTIDASE 61),Os12g0583300	Os12g0595600
BP	GO:0006974	cellular response to DNA damage stimulus	1	1	2	376	0.8737	1	Os07g0255200	Os04g0498900
BP	GO:0009908	flower development	1	0	1	217	0.8743	1	Os03g0251350(HAP5C SUBUNIT OF CCAAT-BOX BINDING COMPLEX)	-
CC	GO:0000139	Golgi membrane	0	1	1	238	0.8752	1	-	Os04g0506800(STLP3)
CC	GO:0098588	bounding membrane of organelle	2	2	4	722	0.8756	1	Os01g0232000(TONOPLAST INTRINSIC PROTEIN 4;3),Os06g0561800(MULTIDRUG RESISTANCE-ASSOCIATED PROTEIN 11)	Os01g0902100(MULTIDRUG RESISTANCE-ASSOCIATED PROTEIN 2),Os04g0506800(STLP3)
BP	GO:0044092	negative regulation of molecular function	0	1	1	219	0.8767	1	-	Os03g0300400(JASMONATE INDUCIBLE PATHOGENESIS-RELATED CLASS 10 PROTEIN)
BP	GO:0051239	regulation of multicellular organismal process	1	0	1	219	0.8767	1	Os03g0251350(HAP5C SUBUNIT OF CCAAT-BOX BINDING COMPLEX)	-
MF	GO:0015077	monovalent inorganic cation transmembrane transporter activity	0	1	1	205	0.87895	1	-	Os08g0466200(HIGH-AFFINITY POTASSIUM(K+) TRANSPORTER 4)
BP	GO:0009755	hormone-mediated signaling pathway	1	1	2	383	0.8802	1	Os01g0952800(basic helix-loop-helix protein 056)	Os03g0300400(JASMONATE INDUCIBLE PATHOGENESIS-RELATED CLASS 10 PROTEIN)
MF	GO:0004857	enzyme inhibitor activity	0	1	1	207	0.88143	1	-	Os03g0300400(JASMONATE INDUCIBLE PATHOGENESIS-RELATED CLASS 10 PROTEIN)
MF	GO:1901363	heterocyclic compound binding	42	37	79	8510	0.8823	1	Os01g0197450,Os01g0600900(CHLOROPHYLL A/B BINDING PROTEIN 2R),Os01g0669100(Large spike S-domain receptor like Kinase 1),Os01g0715900,Os01g0883000(RECEPTOR-LIKE CYTOPLASMIC KINASE 50),Os01g0952800(basic helix-loop-helix protein 056),Os02g0156000(RECEPTOR-LIKE CYTOPLASMIC KINASE 62),Os02g0240300(class III peroxidase 29),Os02g0611500,Os02g0671300(basic helix-loop-helix protein 076),Os03g0251350(HAP5…	CAA34008,Os01g0115600(RECEPTOR-LIKE CYTOPLASMIC KINASE 11),Os01g0186000(WRKY GENE 10),Os01g0339500(NAC DOMAIN-CONTAINING PROTEIN 30),Os01g0902100(MULTIDRUG RESISTANCE-ASSOCIATED PROTEIN 2),Os02g0564700(basic helix-loop-helix protein 097),Os02g0713700,Os03g0109000(NAC DOMAIN-CONTAINING PROTEIN 55),Os03g0235000(PEROXIDASE N),Os03g0262000,Os03g0347900,Os03g0771100,Os04g0369066(RECEPTOR-LIKE CYTOPLAS…
BP	GO:0015711	organic anion transport	1	0	1	224	0.8825	1	Os12g0194900("amino acid permease 10B)	-
BP	GO:0032269	negative regulation of cellular protein metabolic process	0	1	1	225	0.8836	1	-	Os03g0300400(JASMONATE INDUCIBLE PATHOGENESIS-RELATED CLASS 10 PROTEIN)
BP	GO:0051248	negative regulation of protein metabolic process	0	1	1	225	0.8836	1	-	Os03g0300400(JASMONATE INDUCIBLE PATHOGENESIS-RELATED CLASS 10 PROTEIN)
MF	GO:0097159	organic cyclic compound binding	42	37	79	8516	0.88402	1	Os01g0197450,Os01g0600900(CHLOROPHYLL A/B BINDING PROTEIN 2R),Os01g0669100(Large spike S-domain receptor like Kinase 1),Os01g0715900,Os01g0883000(RECEPTOR-LIKE CYTOPLASMIC KINASE 50),Os01g0952800(basic helix-loop-helix protein 056),Os02g0156000(RECEPTOR-LIKE CYTOPLASMIC KINASE 62),Os02g0240300(class III peroxidase 29),Os02g0611500,Os02g0671300(basic helix-loop-helix protein 076),Os03g0251350(HAP5…	CAA34008,Os01g0115600(RECEPTOR-LIKE CYTOPLASMIC KINASE 11),Os01g0186000(WRKY GENE 10),Os01g0339500(NAC DOMAIN-CONTAINING PROTEIN 30),Os01g0902100(MULTIDRUG RESISTANCE-ASSOCIATED PROTEIN 2),Os02g0564700(basic helix-loop-helix protein 097),Os02g0713700,Os03g0109000(NAC DOMAIN-CONTAINING PROTEIN 55),Os03g0235000(PEROXIDASE N),Os03g0262000,Os03g0347900,Os03g0771100,Os04g0369066(RECEPTOR-LIKE CYTOPLAS…
BP	GO:0090567	reproductive shoot system development	1	0	1	226	0.8847	1	Os03g0251350(HAP5C SUBUNIT OF CCAAT-BOX BINDING COMPLEX)	-
BP	GO:0009161	ribonucleoside monophosphate metabolic process	0	1	1	227	0.8858	1	-	Os10g0442400
BP	GO:0034470	ncRNA processing	0	2	2	390	0.8865	1	-	CAA34008,Os10g0442400
MF	GO:0032559	adenyl ribonucleotide binding	15	12	27	3214	0.88769	1	Os01g0669100(Large spike S-domain receptor like Kinase 1),Os01g0883000(RECEPTOR-LIKE CYTOPLASMIC KINASE 50),Os02g0156000(RECEPTOR-LIKE CYTOPLASMIC KINASE 62),Os03g0636800(NIMA-related kinase 1),Os05g0166300,Os05g0398800,Os06g0561800(MULTIDRUG RESISTANCE-ASSOCIATED PROTEIN 11),Os06g0602400(RNA helicase 52A),Os07g0117300,Os07g0255200,Os07g0537500,Os08g0170700,Os08g0179000,Os08g0441100(CALCINEURIN B…	Os01g0115600(RECEPTOR-LIKE CYTOPLASMIC KINASE 11),Os01g0902100(MULTIDRUG RESISTANCE-ASSOCIATED PROTEIN 2),Os03g0262000,Os03g0347900,Os04g0369066(RECEPTOR-LIKE CYTOPLASMIC KINASE 144),Os04g0369100(RECEPTOR-LIKE CYTOPLASMIC KINASE 145),Os04g0608900(dual-specificity protein kinase 4),Os07g0131375,Os11g0548600(lysin motif-containing protein 2),Os11g0590900,Os11g0598500,Os11g0669200(RECEPTOR-LIKE CYTO…
BP	GO:0019220	regulation of phosphate metabolic process	0	1	1	230	0.8891	1	-	Os03g0300400(JASMONATE INDUCIBLE PATHOGENESIS-RELATED CLASS 10 PROTEIN)
BP	GO:0051174	regulation of phosphorus metabolic process	0	1	1	230	0.8891	1	-	Os03g0300400(JASMONATE INDUCIBLE PATHOGENESIS-RELATED CLASS 10 PROTEIN)
BP	GO:0072594	establishment of protein localization to organelle	0	1	1	230	0.8891	1	-	Os05g0509500
MF	GO:0030554	adenyl nucleotide binding	15	12	27	3221	0.89022	1	Os01g0669100(Large spike S-domain receptor like Kinase 1),Os01g0883000(RECEPTOR-LIKE CYTOPLASMIC KINASE 50),Os02g0156000(RECEPTOR-LIKE CYTOPLASMIC KINASE 62),Os03g0636800(NIMA-related kinase 1),Os05g0166300,Os05g0398800,Os06g0561800(MULTIDRUG RESISTANCE-ASSOCIATED PROTEIN 11),Os06g0602400(RNA helicase 52A),Os07g0117300,Os07g0255200,Os07g0537500,Os08g0170700,Os08g0179000,Os08g0441100(CALCINEURIN B…	Os01g0115600(RECEPTOR-LIKE CYTOPLASMIC KINASE 11),Os01g0902100(MULTIDRUG RESISTANCE-ASSOCIATED PROTEIN 2),Os03g0262000,Os03g0347900,Os04g0369066(RECEPTOR-LIKE CYTOPLASMIC KINASE 144),Os04g0369100(RECEPTOR-LIKE CYTOPLASMIC KINASE 145),Os04g0608900(dual-specificity protein kinase 4),Os07g0131375,Os11g0548600(lysin motif-containing protein 2),Os11g0590900,Os11g0598500,Os11g0669200(RECEPTOR-LIKE CYTO…
CC	GO:0044431	Golgi apparatus part	0	2	2	433	0.8918	1	-	Os04g0506800(STLP3),Os06g0708400(CYCLOPHILIN 19-4)
MF	GO:0042623	ATPase activity, coupled	2	1	3	508	0.89394	1	Os06g0561800(MULTIDRUG RESISTANCE-ASSOCIATED PROTEIN 11),Os06g0602400(RNA helicase 52A)	Os01g0902100(MULTIDRUG RESISTANCE-ASSOCIATED PROTEIN 2)
BP	GO:0006259	DNA metabolic process	3	1	4	689	0.8948	1	Os03g0798300(METHYLTRANSFERASE 1A),Os04g0483450,Os07g0255200	Os04g0498900
BP	GO:0032870	cellular response to hormone stimulus	1	1	2	400	0.8948	1	Os01g0952800(basic helix-loop-helix protein 056)	Os03g0300400(JASMONATE INDUCIBLE PATHOGENESIS-RELATED CLASS 10 PROTEIN)
BP	GO:0051336	regulation of hydrolase activity	0	1	1	236	0.8953	1	-	Os03g0300400(JASMONATE INDUCIBLE PATHOGENESIS-RELATED CLASS 10 PROTEIN)
MF	GO:0016791	phosphatase activity	1	1	2	373	0.89629	1	Os01g0191200	Os02g0607500("protein phosphatase 2C22)
BP	GO:0071229	cellular response to acid chemical	0	1	1	237	0.8963	1	-	Os03g0300400(JASMONATE INDUCIBLE PATHOGENESIS-RELATED CLASS 10 PROTEIN)
BP	GO:0010629	negative regulation of gene expression	1	1	2	403	0.8972	1	Os03g0798300(METHYLTRANSFERASE 1A)	Os08g0148600
BP	GO:0044262	cellular carbohydrate metabolic process	1	1	2	403	0.8972	1	Os09g0530200(glycoside hydrolase OsGH9B14)	Os02g0247000
BP	GO:0031399	regulation of protein modification process	0	1	1	238	0.8973	1	-	Os03g0300400(JASMONATE INDUCIBLE PATHOGENESIS-RELATED CLASS 10 PROTEIN)
BP	GO:0043170	macromolecule metabolic process	44	37	81	9387	0.8975	1	Os01g0122000("OsPR5),Os01g0197450,Os01g0566800(basic helix-loop-helix protein 117),Os01g0600900(CHLOROPHYLL A/B BINDING PROTEIN 2R),Os01g0613500,Os01g0669100(Large spike S-domain receptor like Kinase 1),Os01g0715900,Os01g0727840("Subtilisin 3),Os01g0755700,Os01g0806000,Os01g0883000(RECEPTOR-LIKE CYTOPLASMIC KINASE 50),Os01g0952800(basic helix-loop-helix protein 056),Os02g0142250,Os02g0156000(RECE…	CAA34008,Os01g0115600(RECEPTOR-LIKE CYTOPLASMIC KINASE 11),Os01g0186000(WRKY GENE 10),Os01g0339500(NAC DOMAIN-CONTAINING PROTEIN 30),Os01g0676900,Os02g0247000,Os02g0564700(basic helix-loop-helix protein 097),Os02g0607500("protein phosphatase 2C22),Os02g0713700,Os03g0109000(NAC DOMAIN-CONTAINING PROTEIN 55),Os03g0300400(JASMONATE INDUCIBLE PATHOGENESIS-RELATED CLASS 10 PROTEIN),Os03g0771100,Os04g0…
BP	GO:0006725	cellular aromatic compound metabolic process	19	23	42	5176	0.8983	1	Os01g0197450,Os01g0566800(basic helix-loop-helix protein 117),Os01g0715900,Os01g0952800(basic helix-loop-helix protein 056),Os02g0671300(basic helix-loop-helix protein 076),Os03g0251350(HAP5C SUBUNIT OF CCAAT-BOX BINDING COMPLEX),Os03g0798300(METHYLTRANSFERASE 1A),Os04g0483450,Os05g0408900(1-DEOXY-D-XYLULOSE 5-PHOSPHATE SYNTHASE 1),Os06g0108500,Os06g0602400(RNA helicase 52A),Os06g0667200(MADS BOX…	CAA34008,Os01g0186000(WRKY GENE 10),Os01g0339500(NAC DOMAIN-CONTAINING PROTEIN 30),Os01g0676900,Os02g0564700(basic helix-loop-helix protein 097),Os02g0713700,Os02g0811800(CINNAMOYL-COA REDUCTASE 10),Os03g0109000(NAC DOMAIN-CONTAINING PROTEIN 55),Os03g0771100,Os04g0498900,Os04g0678400(DNA BINDING WITH ONE FINGER 17),Os05g0390800(VQ motif-containing protein 19),Os05g0549800(APETALA2/ETHYLENE-RESPON…
BP	GO:0048285	organelle fission	0	1	1	239	0.8983	1	-	Os04g0498900
BP	GO:0006807	nitrogen compound metabolic process	46	41	87	10021	0.8983	1	Os01g0122000("OsPR5),Os01g0197450,Os01g0566800(basic helix-loop-helix protein 117),Os01g0600900(CHLOROPHYLL A/B BINDING PROTEIN 2R),Os01g0613500,Os01g0669100(Large spike S-domain receptor like Kinase 1),Os01g0715900,Os01g0727840("Subtilisin 3),Os01g0755700,Os01g0806000,Os01g0883000(RECEPTOR-LIKE CYTOPLASMIC KINASE 50),Os01g0952800(basic helix-loop-helix protein 056),Os02g0142250,Os02g0156000(RECE…	CAA34008,Os01g0115600(RECEPTOR-LIKE CYTOPLASMIC KINASE 11),Os01g0186000(WRKY GENE 10),Os01g0339500(NAC DOMAIN-CONTAINING PROTEIN 30),Os01g0558100(TAU GLUTATHIONE S-TRANSFERASE 6),Os01g0676900,Os02g0564700(basic helix-loop-helix protein 097),Os02g0607500("protein phosphatase 2C22),Os02g0621300("ECERIFERUM 1),Os02g0713700,Os03g0109000(NAC DOMAIN-CONTAINING PROTEIN 55),Os03g0300400(JASMONATE INDUCIB…
BP	GO:0044271	cellular nitrogen compound biosynthetic process	14	14	28	3602	0.8986	1	Os01g0566800(basic helix-loop-helix protein 117),Os01g0952800(basic helix-loop-helix protein 056),Os02g0611500,Os02g0671300(basic helix-loop-helix protein 076),Os03g0251350(HAP5C SUBUNIT OF CCAAT-BOX BINDING COMPLEX),Os04g0483450,Os05g0408900(1-DEOXY-D-XYLULOSE 5-PHOSPHATE SYNTHASE 1),Os06g0108500,Os06g0667200(MADS BOX GENE 30),Os08g0136100(RICE OUTMOST CELL-SPECIFIC GENE 7),Os08g0246800,Os08g049…	Os01g0186000(WRKY GENE 10),Os01g0339500(NAC DOMAIN-CONTAINING PROTEIN 30),Os01g0676900,Os02g0564700(basic helix-loop-helix protein 097),Os02g0713700,Os03g0109000(NAC DOMAIN-CONTAINING PROTEIN 55),Os03g0771100,Os04g0678400(DNA BINDING WITH ONE FINGER 17),Os05g0390800(VQ motif-containing protein 19),Os05g0549800(APETALA2/ETHYLENE-RESPONSIVE ELEMENT BINDING PROTEIN 96),Os07g0628500("basic Helix-Loop…
MF	GO:0009055	electron transfer activity	1	0	1	223	0.89954	1	Os08g0137400(UCLACYANIN-LIKE PROTEIN 23)	-
BP	GO:0009150	purine ribonucleotide metabolic process	0	1	1	242	0.9012	1	-	Os10g0442400
MF	GO:0061630	ubiquitin protein ligase activity	2	0	2	379	0.90132	1	Os01g0122000("OsPR5),Os01g0755700	-
BP	GO:0071495	cellular response to endogenous stimulus	1	1	2	409	0.9019	1	Os01g0952800(basic helix-loop-helix protein 056)	Os03g0300400(JASMONATE INDUCIBLE PATHOGENESIS-RELATED CLASS 10 PROTEIN)
MF	GO:0061659	ubiquitin-like protein ligase activity	2	0	2	381	0.90294	1	Os01g0122000("OsPR5),Os01g0755700	-
MF	GO:0000989	transcription factor activity, transcription factor binding	0	1	1	227	0.90362	1	-	Os03g0771100
CC	GO:0005623	cell	61	52	113	13829	0.9042	1	Os01g0122000("OsPR5),Os01g0136100(16.9 KDA CLASS I HEAT SHOCK PROTEIN 1),Os01g0197450,Os01g0232000(TONOPLAST INTRINSIC PROTEIN 4;3),Os01g0566800(basic helix-loop-helix protein 117),Os01g0600900(CHLOROPHYLL A/B BINDING PROTEIN 2R),Os01g0613500,Os01g0669100(Large spike S-domain receptor like Kinase 1),Os01g0715900,Os01g0883000(RECEPTOR-LIKE CYTOPLASMIC KINASE 50),Os01g0952800(basic helix-loop-helix…	CAA34008,Os01g0186000(WRKY GENE 10),Os01g0339500(NAC DOMAIN-CONTAINING PROTEIN 30),Os01g0558100(TAU GLUTATHIONE S-TRANSFERASE 6),Os01g0902100(MULTIDRUG RESISTANCE-ASSOCIATED PROTEIN 2),Os01g0940800("beta-1),Os02g0247000,Os02g0564700(basic helix-loop-helix protein 097),Os02g0575900(EXOCYST SUBUNIT EXO70 FAMILY PROTEIN FX6),Os02g0621300("ECERIFERUM 1),Os02g0713700,Os03g0109000(NAC DOMAIN-CONTAINING…
BP	GO:0032787	monocarboxylic acid metabolic process	0	2	2	413	0.9048	1	-	Os06g0486900("FDH2),Os10g0442400
MF	GO:0003723	RNA binding	8	5	13	1728	0.90497	1	Os01g0197450,Os01g0715900,Os02g0611500,Os03g0440200,Os05g0326675,Os06g0602400(RNA helicase 52A),Os08g0126700(ZINC FINGER CCCH DOMAIN-CONTAINING PROTEIN 54),Os10g0486300	CAA34008,Os05g0509500,Os07g0588100,Os09g0417500,Os09g0538000(RIBONUCLEASE 5)
BP	GO:0030163	protein catabolic process	5	1	6	982	0.9078	1	Os01g0122000("OsPR5),Os01g0613500,Os01g0755700,Os07g0533300,Os12g0583300	Os12g0595600
BP	GO:0010605	negative regulation of macromolecule metabolic process	1	2	3	568	0.9079	1	Os03g0798300(METHYLTRANSFERASE 1A)	Os03g0300400(JASMONATE INDUCIBLE PATHOGENESIS-RELATED CLASS 10 PROTEIN),Os08g0148600
MF	GO:0032553	ribonucleotide binding	16	13	29	3490	0.90862	1	Os01g0669100(Large spike S-domain receptor like Kinase 1),Os01g0883000(RECEPTOR-LIKE CYTOPLASMIC KINASE 50),Os02g0156000(RECEPTOR-LIKE CYTOPLASMIC KINASE 62),Os03g0636800(NIMA-related kinase 1),Os05g0166300,Os05g0398800,Os05g0555600(NADH-DEPENDENT GLUTAMATE SYNTHASE 2),Os06g0561800(MULTIDRUG RESISTANCE-ASSOCIATED PROTEIN 11),Os06g0602400(RNA helicase 52A),Os07g0117300,Os07g0255200,Os07g0537500,Os…	Os01g0115600(RECEPTOR-LIKE CYTOPLASMIC KINASE 11),Os01g0902100(MULTIDRUG RESISTANCE-ASSOCIATED PROTEIN 2),Os03g0262000,Os03g0347900,Os04g0369066(RECEPTOR-LIKE CYTOPLASMIC KINASE 144),Os04g0369100(RECEPTOR-LIKE CYTOPLASMIC KINASE 145),Os04g0608900(dual-specificity protein kinase 4),Os05g0509500,Os07g0131375,Os11g0548600(lysin motif-containing protein 2),Os11g0590900,Os11g0598500,Os11g0669200(RECEP…
MF	GO:0036094	small molecule binding	19	15	34	4021	0.90886	1	Os01g0669100(Large spike S-domain receptor like Kinase 1),Os01g0883000(RECEPTOR-LIKE CYTOPLASMIC KINASE 50),Os02g0156000(RECEPTOR-LIKE CYTOPLASMIC KINASE 62),Os03g0636800(NIMA-related kinase 1),Os04g0223500,Os05g0166300,Os05g0398800,Os05g0555600(NADH-DEPENDENT GLUTAMATE SYNTHASE 2),Os06g0561800(MULTIDRUG RESISTANCE-ASSOCIATED PROTEIN 11),Os06g0602400(RNA helicase 52A),Os07g0117300,Os07g0255200,Os…	Os01g0115600(RECEPTOR-LIKE CYTOPLASMIC KINASE 11),Os01g0902100(MULTIDRUG RESISTANCE-ASSOCIATED PROTEIN 2),Os03g0262000,Os03g0300400(JASMONATE INDUCIBLE PATHOGENESIS-RELATED CLASS 10 PROTEIN),Os03g0347900,Os04g0369066(RECEPTOR-LIKE CYTOPLASMIC KINASE 144),Os04g0369100(RECEPTOR-LIKE CYTOPLASMIC KINASE 145),Os04g0608900(dual-specificity protein kinase 4),Os05g0509500,Os06g0486900("FDH2),Os07g0131375…
MF	GO:0005524	ATP binding	13	9	22	2738	0.90926	1	Os01g0669100(Large spike S-domain receptor like Kinase 1),Os01g0883000(RECEPTOR-LIKE CYTOPLASMIC KINASE 50),Os02g0156000(RECEPTOR-LIKE CYTOPLASMIC KINASE 62),Os03g0636800(NIMA-related kinase 1),Os05g0166300,Os05g0398800,Os06g0561800(MULTIDRUG RESISTANCE-ASSOCIATED PROTEIN 11),Os06g0602400(RNA helicase 52A),Os07g0255200,Os07g0537500,Os08g0179000,Os08g0441100(CALCINEURIN B-LIKE PROTEIN-INTERACTING …	Os01g0115600(RECEPTOR-LIKE CYTOPLASMIC KINASE 11),Os01g0902100(MULTIDRUG RESISTANCE-ASSOCIATED PROTEIN 2),Os03g0262000,Os04g0369066(RECEPTOR-LIKE CYTOPLASMIC KINASE 144),Os04g0369100(RECEPTOR-LIKE CYTOPLASMIC KINASE 145),Os04g0608900(dual-specificity protein kinase 4),Os07g0131375,Os11g0548600(lysin motif-containing protein 2),Os11g0669200(RECEPTOR-LIKE CYTOPLASMIC KINASE 350)
BP	GO:0006163	purine nucleotide metabolic process	0	1	1	252	0.9102	1	-	Os10g0442400
BP	GO:0009123	nucleoside monophosphate metabolic process	0	1	1	252	0.9102	1	-	Os10g0442400
BP	GO:1901615	organic hydroxy compound metabolic process	0	1	1	255	0.9128	1	-	Os07g0519600
CC	GO:0009507	chloroplast	6	3	9	1517	0.916	1	Os01g0600900(CHLOROPHYLL A/B BINDING PROTEIN 2R),Os04g0457000("light-harvesting protein CP24),Os05g0408900(1-DEOXY-D-XYLULOSE 5-PHOSPHATE SYNTHASE 1),Os05g0555600(NADH-DEPENDENT GLUTAMATE SYNTHASE 2),Os09g0294000,Os09g0517000	CAA34008,Os06g0486900("FDH2),Os06g0708400(CYCLOPHILIN 19-4)
CC	GO:0044464	cell part	60	52	112	13778	0.9193	1	Os01g0122000("OsPR5),Os01g0136100(16.9 KDA CLASS I HEAT SHOCK PROTEIN 1),Os01g0197450,Os01g0232000(TONOPLAST INTRINSIC PROTEIN 4;3),Os01g0566800(basic helix-loop-helix protein 117),Os01g0600900(CHLOROPHYLL A/B BINDING PROTEIN 2R),Os01g0613500,Os01g0669100(Large spike S-domain receptor like Kinase 1),Os01g0715900,Os01g0883000(RECEPTOR-LIKE CYTOPLASMIC KINASE 50),Os01g0952800(basic helix-loop-helix…	CAA34008,Os01g0186000(WRKY GENE 10),Os01g0339500(NAC DOMAIN-CONTAINING PROTEIN 30),Os01g0558100(TAU GLUTATHIONE S-TRANSFERASE 6),Os01g0902100(MULTIDRUG RESISTANCE-ASSOCIATED PROTEIN 2),Os01g0940800("beta-1),Os02g0247000,Os02g0564700(basic helix-loop-helix protein 097),Os02g0575900(EXOCYST SUBUNIT EXO70 FAMILY PROTEIN FX6),Os02g0621300("ECERIFERUM 1),Os02g0713700,Os03g0109000(NAC DOMAIN-CONTAINING…
MF	GO:0000988	transcription factor activity, protein binding	0	1	1	245	0.92003	1	-	Os03g0771100
MF	GO:0005525	GTP binding	0	1	1	245	0.92003	1	-	Os05g0509500
BP	GO:0071705	nitrogen compound transport	3	3	6	1010	0.9208	1	Os03g0282300,Os10g0111700,Os12g0194900("amino acid permease 10B)	Os02g0575900(EXOCYST SUBUNIT EXO70 FAMILY PROTEIN FX6),Os05g0509500,Os07g0519600
MF	GO:0001883	purine nucleoside binding	0	1	1	246	0.92086	1	-	Os05g0509500
MF	GO:0019001	guanyl nucleotide binding	0	1	1	246	0.92086	1	-	Os05g0509500
MF	GO:0032550	purine ribonucleoside binding	0	1	1	246	0.92086	1	-	Os05g0509500
MF	GO:0032561	guanyl ribonucleotide binding	0	1	1	246	0.92086	1	-	Os05g0509500
MF	GO:0016787	hydrolase activity	20	14	34	4066	0.9211	1	Os01g0191200,Os01g0197450,Os01g0613500,Os01g0715900,Os01g0727840("Subtilisin 3),Os01g0806000,Os05g0375400("(1),Os06g0561800(MULTIDRUG RESISTANCE-ASSOCIATED PROTEIN 11),Os06g0597250,Os06g0602400(RNA helicase 52A),Os07g0108100,Os07g0255200,Os07g0532500,Os07g0533300,Os07g0575500,Os07g0607400(PECTIN METHYLESTERASE 20),Os09g0530200(glycoside hydrolase OsGH9B14),Os11g0461000(SERINE CARBOXYPEPTIDASE 61)…	Os01g0902100(MULTIDRUG RESISTANCE-ASSOCIATED PROTEIN 2),Os01g0940800("beta-1),Os02g0607500("protein phosphatase 2C22),Os04g0474800(BETA-GLUCOSIDASE 12),Os04g0640700,Os05g0509500,Os06g0726100(CHITINASE 3),Os07g0588100,Os08g0148600,Os09g0110300(cyclase-like 4),Os09g0417500,Os09g0538000(RIBONUCLEASE 5),Os10g0543400,Os11g0701600
CC	GO:0012505	endomembrane system	4	5	9	1533	0.9217	1	Os02g0142250,Os04g0483500("beta-ketoacyl-CoA reductase 1),Os06g0299100,Os12g0236100	Os02g0621300("ECERIFERUM 1),Os04g0369000(RECEPTOR-LIKE CYTOPLASMIC KINASE 144),Os04g0506800(STLP3),Os06g0273500("leaf senescence protein),Os06g0708400(CYCLOPHILIN 19-4)
BP	GO:0009892	negative regulation of metabolic process	1	2	3	596	0.9239	1	Os03g0798300(METHYLTRANSFERASE 1A)	Os03g0300400(JASMONATE INDUCIBLE PATHOGENESIS-RELATED CLASS 10 PROTEIN),Os08g0148600
BP	GO:0048869	cellular developmental process	1	1	2	442	0.9241	1	Os03g0100020(TETRASPANIN 4)	Os03g0771100
BP	GO:0009259	ribonucleotide metabolic process	0	1	1	271	0.9253	1	-	Os10g0442400
MF	GO:0016779	nucleotidyltransferase activity	1	0	1	253	0.92641	1	Os04g0483450	-
MF	GO:0032549	ribonucleoside binding	0	1	1	253	0.92641	1	-	Os05g0509500
MF	GO:0001882	nucleoside binding	0	1	1	254	0.92717	1	-	Os05g0509500
MF	GO:0032555	purine ribonucleotide binding	15	13	28	3450	0.92736	1	Os01g0669100(Large spike S-domain receptor like Kinase 1),Os01g0883000(RECEPTOR-LIKE CYTOPLASMIC KINASE 50),Os02g0156000(RECEPTOR-LIKE CYTOPLASMIC KINASE 62),Os03g0636800(NIMA-related kinase 1),Os05g0166300,Os05g0398800,Os06g0561800(MULTIDRUG RESISTANCE-ASSOCIATED PROTEIN 11),Os06g0602400(RNA helicase 52A),Os07g0117300,Os07g0255200,Os07g0537500,Os08g0170700,Os08g0179000,Os08g0441100(CALCINEURIN B…	Os01g0115600(RECEPTOR-LIKE CYTOPLASMIC KINASE 11),Os01g0902100(MULTIDRUG RESISTANCE-ASSOCIATED PROTEIN 2),Os03g0262000,Os03g0347900,Os04g0369066(RECEPTOR-LIKE CYTOPLASMIC KINASE 144),Os04g0369100(RECEPTOR-LIKE CYTOPLASMIC KINASE 145),Os04g0608900(dual-specificity protein kinase 4),Os05g0509500,Os07g0131375,Os11g0548600(lysin motif-containing protein 2),Os11g0590900,Os11g0598500,Os11g0669200(RECEP…
BP	GO:0033365	protein localization to organelle	0	1	1	275	0.9281	1	-	Os05g0509500
MF	GO:0017076	purine nucleotide binding	15	13	28	3458	0.92938	1	Os01g0669100(Large spike S-domain receptor like Kinase 1),Os01g0883000(RECEPTOR-LIKE CYTOPLASMIC KINASE 50),Os02g0156000(RECEPTOR-LIKE CYTOPLASMIC KINASE 62),Os03g0636800(NIMA-related kinase 1),Os05g0166300,Os05g0398800,Os06g0561800(MULTIDRUG RESISTANCE-ASSOCIATED PROTEIN 11),Os06g0602400(RNA helicase 52A),Os07g0117300,Os07g0255200,Os07g0537500,Os08g0170700,Os08g0179000,Os08g0441100(CALCINEURIN B…	Os01g0115600(RECEPTOR-LIKE CYTOPLASMIC KINASE 11),Os01g0902100(MULTIDRUG RESISTANCE-ASSOCIATED PROTEIN 2),Os03g0262000,Os03g0347900,Os04g0369066(RECEPTOR-LIKE CYTOPLASMIC KINASE 144),Os04g0369100(RECEPTOR-LIKE CYTOPLASMIC KINASE 145),Os04g0608900(dual-specificity protein kinase 4),Os05g0509500,Os07g0131375,Os11g0548600(lysin motif-containing protein 2),Os11g0590900,Os11g0598500,Os11g0669200(RECEP…
BP	GO:0000278	mitotic cell cycle	0	1	1	277	0.9295	1	-	Os04g0498900
BP	GO:0008380	RNA splicing	0	1	1	278	0.9301	1	-	CAA34008
CC	GO:0009536	plastid	6	3	9	1559	0.9302	1	Os01g0600900(CHLOROPHYLL A/B BINDING PROTEIN 2R),Os04g0457000("light-harvesting protein CP24),Os05g0408900(1-DEOXY-D-XYLULOSE 5-PHOSPHATE SYNTHASE 1),Os05g0555600(NADH-DEPENDENT GLUTAMATE SYNTHASE 2),Os09g0294000,Os09g0517000	CAA34008,Os06g0486900("FDH2),Os06g0708400(CYCLOPHILIN 19-4)
BP	GO:0022900	electron transport chain	1	0	1	281	0.9321	1	Os08g0137400(UCLACYANIN-LIKE PROTEIN 23)	-
BP	GO:0072521	purine-containing compound metabolic process	0	1	1	287	0.9359	1	-	Os10g0442400
MF	GO:0140096	catalytic activity, acting on a protein	19	10	29	3598	0.93701	1	Os01g0122000("OsPR5),Os01g0613500,Os01g0669100(Large spike S-domain receptor like Kinase 1),Os01g0727840("Subtilisin 3),Os01g0755700,Os01g0806000,Os01g0883000(RECEPTOR-LIKE CYTOPLASMIC KINASE 50),Os02g0156000(RECEPTOR-LIKE CYTOPLASMIC KINASE 62),Os03g0636800(NIMA-related kinase 1),Os05g0166300,Os05g0398800,Os07g0108100,Os07g0532500,Os07g0533300,Os07g0537500,Os08g0179000,Os08g0441100(CALCINEURIN B…	Os01g0115600(RECEPTOR-LIKE CYTOPLASMIC KINASE 11),Os02g0607500("protein phosphatase 2C22),Os04g0369066(RECEPTOR-LIKE CYTOPLASMIC KINASE 144),Os04g0369100(RECEPTOR-LIKE CYTOPLASMIC KINASE 145),Os04g0608900(dual-specificity protein kinase 4),Os06g0708400(CYCLOPHILIN 19-4),Os07g0131375,Os08g0230800(Lectin Receptor Kinase paralog),Os11g0548600(lysin motif-containing protein 2),Os11g0669200(RECEPTOR-L…
BP	GO:0006461	protein complex assembly	1	0	1	290	0.9378	1	Os01g0136100(16.9 KDA CLASS I HEAT SHOCK PROTEIN 1)	-
BP	GO:0070271	protein complex biogenesis	1	0	1	290	0.9378	1	Os01g0136100(16.9 KDA CLASS I HEAT SHOCK PROTEIN 1)	-
MF	GO:0042578	phosphoric ester hydrolase activity	1	1	2	436	0.93897	1	Os01g0191200	Os02g0607500("protein phosphatase 2C22)
BP	GO:0044260	cellular macromolecule metabolic process	36	36	72	8625	0.9391	1	Os01g0122000("OsPR5),Os01g0197450,Os01g0566800(basic helix-loop-helix protein 117),Os01g0600900(CHLOROPHYLL A/B BINDING PROTEIN 2R),Os01g0613500,Os01g0669100(Large spike S-domain receptor like Kinase 1),Os01g0715900,Os01g0755700,Os01g0883000(RECEPTOR-LIKE CYTOPLASMIC KINASE 50),Os01g0952800(basic helix-loop-helix protein 056),Os02g0142250,Os02g0156000(RECEPTOR-LIKE CYTOPLASMIC KINASE 62),Os02g025…	CAA34008,Os01g0115600(RECEPTOR-LIKE CYTOPLASMIC KINASE 11),Os01g0186000(WRKY GENE 10),Os01g0339500(NAC DOMAIN-CONTAINING PROTEIN 30),Os01g0676900,Os02g0247000,Os02g0564700(basic helix-loop-helix protein 097),Os02g0607500("protein phosphatase 2C22),Os02g0713700,Os03g0109000(NAC DOMAIN-CONTAINING PROTEIN 55),Os03g0300400(JASMONATE INDUCIBLE PATHOGENESIS-RELATED CLASS 10 PROTEIN),Os03g0771100,Os04g0…
BP	GO:0015833	peptide transport	2	2	4	778	0.9398	1	Os03g0282300,Os10g0111700	Os02g0575900(EXOCYST SUBUNIT EXO70 FAMILY PROTEIN FX6),Os05g0509500
BP	GO:0048519	negative regulation of biological process	2	2	4	778	0.9398	1	Os03g0251350(HAP5C SUBUNIT OF CCAAT-BOX BINDING COMPLEX),Os03g0798300(METHYLTRANSFERASE 1A)	Os03g0300400(JASMONATE INDUCIBLE PATHOGENESIS-RELATED CLASS 10 PROTEIN),Os08g0148600
CC	GO:0005634	nucleus	17	13	30	4361	0.9413	1	Os01g0122000("OsPR5),Os01g0566800(basic helix-loop-helix protein 117),Os01g0952800(basic helix-loop-helix protein 056),Os02g0671300(basic helix-loop-helix protein 076),Os03g0251350(HAP5C SUBUNIT OF CCAAT-BOX BINDING COMPLEX),Os03g0251425,Os03g0798300(METHYLTRANSFERASE 1A),Os06g0108500,Os06g0602400(RNA helicase 52A),Os06g0667200(MADS BOX GENE 30),Os07g0533201(WUSCHEL-LIKE HOMEOBOX 9),Os08g0136100(…	Os01g0186000(WRKY GENE 10),Os01g0339500(NAC DOMAIN-CONTAINING PROTEIN 30),Os02g0564700(basic helix-loop-helix protein 097),Os02g0713700,Os03g0109000(NAC DOMAIN-CONTAINING PROTEIN 55),Os03g0300400(JASMONATE INDUCIBLE PATHOGENESIS-RELATED CLASS 10 PROTEIN),Os03g0771100,Os04g0678400(DNA BINDING WITH ONE FINGER 17),Os05g0549800(APETALA2/ETHYLENE-RESPONSIVE ELEMENT BINDING PROTEIN 96),Os07g0628500("ba…
MF	GO:0005515	protein binding	29	11	40	4794	0.94211	1	Os01g0136100(16.9 KDA CLASS I HEAT SHOCK PROTEIN 1),Os01g0197450,Os01g0566800(basic helix-loop-helix protein 117),Os01g0577300(TRANSCRIPTIONAL ACTIVATOR B),Os01g0715900,Os01g0806000,Os01g0952800(basic helix-loop-helix protein 056),Os02g0198000,Os02g0611500,Os02g0671300(basic helix-loop-helix protein 076),Os03g0251350(HAP5C SUBUNIT OF CCAAT-BOX BINDING COMPLEX),Os03g0251425,Os03g0304500,Os04g04570…	Os01g0162200,Os01g0558100(TAU GLUTATHIONE S-TRANSFERASE 6),Os02g0564700(basic helix-loop-helix protein 097),Os04g0280500,Os06g0708400(CYCLOPHILIN 19-4),Os07g0588100,Os07g0628500("basic Helix-Loop-Helix protein 1),Os09g0344500("O-methyltransferase ZRP4),Os09g0417500,Os11g0245100(ZETA GLUTATHIONE S-TRANSFERASE 4),Os11g0514400
BP	GO:0034660	ncRNA metabolic process	0	2	2	478	0.9429	1	-	CAA34008,Os10g0442400
BP	GO:0009653	anatomical structure morphogenesis	1	0	1	300	0.9435	1	Os03g0100020(TETRASPANIN 4)	-
BP	GO:0019693	ribose phosphate metabolic process	0	1	1	300	0.9435	1	-	Os10g0442400
MF	GO:0035639	purine ribonucleoside triphosphate binding	13	10	23	2973	0.94351	1	Os01g0669100(Large spike S-domain receptor like Kinase 1),Os01g0883000(RECEPTOR-LIKE CYTOPLASMIC KINASE 50),Os02g0156000(RECEPTOR-LIKE CYTOPLASMIC KINASE 62),Os03g0636800(NIMA-related kinase 1),Os05g0166300,Os05g0398800,Os06g0561800(MULTIDRUG RESISTANCE-ASSOCIATED PROTEIN 11),Os06g0602400(RNA helicase 52A),Os07g0255200,Os07g0537500,Os08g0179000,Os08g0441100(CALCINEURIN B-LIKE PROTEIN-INTERACTING …	Os01g0115600(RECEPTOR-LIKE CYTOPLASMIC KINASE 11),Os01g0902100(MULTIDRUG RESISTANCE-ASSOCIATED PROTEIN 2),Os03g0262000,Os04g0369066(RECEPTOR-LIKE CYTOPLASMIC KINASE 144),Os04g0369100(RECEPTOR-LIKE CYTOPLASMIC KINASE 145),Os04g0608900(dual-specificity protein kinase 4),Os05g0509500,Os07g0131375,Os11g0548600(lysin motif-containing protein 2),Os11g0669200(RECEPTOR-LIKE CYTOPLASMIC KINASE 350)
CC	GO:0005730	nucleolus	1	0	1	328	0.9436	1	Os06g0602400(RNA helicase 52A)	-
BP	GO:0009725	response to hormone	1	2	3	639	0.9437	1	Os01g0952800(basic helix-loop-helix protein 056)	Os02g0621300("ECERIFERUM 1),Os03g0300400(JASMONATE INDUCIBLE PATHOGENESIS-RELATED CLASS 10 PROTEIN)
MF	GO:0016887	ATPase activity	2	1	3	597	0.94523	1	Os06g0561800(MULTIDRUG RESISTANCE-ASSOCIATED PROTEIN 11),Os06g0602400(RNA helicase 52A)	Os01g0902100(MULTIDRUG RESISTANCE-ASSOCIATED PROTEIN 2)
BP	GO:0042886	amide transport	2	2	4	793	0.9454	1	Os03g0282300,Os10g0111700	Os02g0575900(EXOCYST SUBUNIT EXO70 FAMILY PROTEIN FX6),Os05g0509500
BP	GO:0009719	response to endogenous stimulus	1	2	3	648	0.9472	1	Os01g0952800(basic helix-loop-helix protein 056)	Os02g0621300("ECERIFERUM 1),Os03g0300400(JASMONATE INDUCIBLE PATHOGENESIS-RELATED CLASS 10 PROTEIN)
MF	GO:0016788	hydrolase activity, acting on ester bonds	5	5	10	1502	0.94743	1	Os01g0191200,Os01g0197450,Os01g0715900,Os06g0597250,Os07g0607400(PECTIN METHYLESTERASE 20)	Os02g0607500("protein phosphatase 2C22),Os07g0588100,Os08g0148600,Os09g0417500,Os09g0538000(RIBONUCLEASE 5)
CC	GO:0098796	membrane protein complex	2	0	2	538	0.9492	1	Os01g0600900(CHLOROPHYLL A/B BINDING PROTEIN 2R),Os04g0457000("light-harvesting protein CP24)	-
BP	GO:0016051	carbohydrate biosynthetic process	0	1	1	313	0.9502	1	-	Os02g0247000
MF	GO:0043168	anion binding	18	14	32	3993	0.95134	1	Os01g0669100(Large spike S-domain receptor like Kinase 1),Os01g0883000(RECEPTOR-LIKE CYTOPLASMIC KINASE 50),Os02g0156000(RECEPTOR-LIKE CYTOPLASMIC KINASE 62),Os03g0636800(NIMA-related kinase 1),Os04g0223500,Os05g0166300,Os05g0398800,Os05g0555600(NADH-DEPENDENT GLUTAMATE SYNTHASE 2),Os06g0561800(MULTIDRUG RESISTANCE-ASSOCIATED PROTEIN 11),Os06g0602400(RNA helicase 52A),Os07g0117300,Os07g0255200,Os…	Os01g0115600(RECEPTOR-LIKE CYTOPLASMIC KINASE 11),Os01g0902100(MULTIDRUG RESISTANCE-ASSOCIATED PROTEIN 2),Os03g0262000,Os03g0300400(JASMONATE INDUCIBLE PATHOGENESIS-RELATED CLASS 10 PROTEIN),Os03g0347900,Os04g0369066(RECEPTOR-LIKE CYTOPLASMIC KINASE 144),Os04g0369100(RECEPTOR-LIKE CYTOPLASMIC KINASE 145),Os04g0608900(dual-specificity protein kinase 4),Os05g0509500,Os07g0131375,Os11g0548600(lysin …
BP	GO:0071704	organic substance metabolic process	50	52	102	11835	0.952	1	Os01g0122000("OsPR5),Os01g0197450,Os01g0566800(basic helix-loop-helix protein 117),Os01g0600900(CHLOROPHYLL A/B BINDING PROTEIN 2R),Os01g0613500,Os01g0669100(Large spike S-domain receptor like Kinase 1),Os01g0715900,Os01g0727840("Subtilisin 3),Os01g0755700,Os01g0806000,Os01g0883000(RECEPTOR-LIKE CYTOPLASMIC KINASE 50),Os01g0952800(basic helix-loop-helix protein 056),Os02g0142250,Os02g0156000(RECE…	CAA34008,Os01g0115600(RECEPTOR-LIKE CYTOPLASMIC KINASE 11),Os01g0186000(WRKY GENE 10),Os01g0339500(NAC DOMAIN-CONTAINING PROTEIN 30),Os01g0558100(TAU GLUTATHIONE S-TRANSFERASE 6),Os01g0676900,Os01g0940800("beta-1),Os02g0247000,Os02g0564700(basic helix-loop-helix protein 097),Os02g0570400(ENT-KAURENE SYNTHASE 7),Os02g0607500("protein phosphatase 2C22),Os02g0621300("ECERIFERUM 1),Os02g0713700,Os02g…
BP	GO:0006397	mRNA processing	0	1	1	318	0.9525	1	-	CAA34008
BP	GO:1901701	cellular response to oxygen-containing compound	0	1	1	318	0.9525	1	-	Os03g0300400(JASMONATE INDUCIBLE PATHOGENESIS-RELATED CLASS 10 PROTEIN)
CC	GO:0005794	Golgi apparatus	0	3	3	733	0.9553	1	-	Os04g0506800(STLP3),Os06g0273500("leaf senescence protein),Os06g0708400(CYCLOPHILIN 19-4)
CC	GO:0031967	organelle envelope	3	0	3	735	0.9559	1	Os01g0600900(CHLOROPHYLL A/B BINDING PROTEIN 2R),Os04g0457000("light-harvesting protein CP24),Os12g0236100	-
CC	GO:0031975	envelope	3	0	3	735	0.9559	1	Os01g0600900(CHLOROPHYLL A/B BINDING PROTEIN 2R),Os04g0457000("light-harvesting protein CP24),Os12g0236100	-
MF	GO:0017111	nucleoside-triphosphatase activity	3	2	5	904	0.95623	1	Os06g0561800(MULTIDRUG RESISTANCE-ASSOCIATED PROTEIN 11),Os06g0602400(RNA helicase 52A),Os07g0255200	Os01g0902100(MULTIDRUG RESISTANCE-ASSOCIATED PROTEIN 2),Os05g0509500
CC	GO:0031410	cytoplasmic vesicle	0	1	1	359	0.9571	1	-	Os06g0708400(CYCLOPHILIN 19-4)
CC	GO:0097708	intracellular vesicle	0	1	1	360	0.9575	1	-	Os06g0708400(CYCLOPHILIN 19-4)
MF	GO:0003676	nucleic acid binding	20	15	35	4359	0.95847	1	Os01g0197450,Os01g0715900,Os01g0952800(basic helix-loop-helix protein 056),Os02g0611500,Os02g0671300(basic helix-loop-helix protein 076),Os03g0251350(HAP5C SUBUNIT OF CCAAT-BOX BINDING COMPLEX),Os03g0440200,Os03g0798300(METHYLTRANSFERASE 1A),Os05g0296200,Os05g0326675,Os06g0108500,Os06g0602400(RNA helicase 52A),Os06g0667200(MADS BOX GENE 30),Os07g0533201(WUSCHEL-LIKE HOMEOBOX 9),Os08g0126700(ZINC …	CAA34008,Os01g0186000(WRKY GENE 10),Os01g0339500(NAC DOMAIN-CONTAINING PROTEIN 30),Os02g0564700(basic helix-loop-helix protein 097),Os02g0713700,Os03g0109000(NAC DOMAIN-CONTAINING PROTEIN 55),Os03g0771100,Os04g0678400(DNA BINDING WITH ONE FINGER 17),Os05g0509500,Os05g0549800(APETALA2/ETHYLENE-RESPONSIVE ELEMENT BINDING PROTEIN 96),Os07g0588100,Os07g0628500("basic Helix-Loop-Helix protein 1),Os09g…
BP	GO:0030154	cell differentiation	0	1	1	334	0.9593	1	-	Os03g0771100
BP	GO:0010033	response to organic substance	1	3	4	838	0.9594	1	Os01g0952800(basic helix-loop-helix protein 056)	Os02g0621300("ECERIFERUM 1),Os03g0300400(JASMONATE INDUCIBLE PATHOGENESIS-RELATED CLASS 10 PROTEIN),Os08g0148600
BP	GO:0015031	protein transport	1	2	3	686	0.9599	1	Os03g0282300	Os02g0575900(EXOCYST SUBUNIT EXO70 FAMILY PROTEIN FX6),Os05g0509500
BP	GO:0048367	shoot system development	1	0	1	336	0.9601	1	Os03g0251350(HAP5C SUBUNIT OF CCAAT-BOX BINDING COMPLEX)	-
BP	GO:0007049	cell cycle	1	1	2	523	0.9603	1	Os03g0100020(TETRASPANIN 4)	Os04g0498900
BP	GO:0051603	proteolysis involved in cellular protein catabolic process	3	1	4	844	0.961	1	Os01g0122000("OsPR5),Os01g0613500,Os01g0755700	Os12g0595600
BP	GO:0045184	establishment of protein localization	1	2	3	690	0.961	1	Os03g0282300	Os02g0575900(EXOCYST SUBUNIT EXO70 FAMILY PROTEIN FX6),Os05g0509500
BP	GO:0006139	nucleobase-containing compound metabolic process	17	19	36	4809	0.9611	1	Os01g0197450,Os01g0566800(basic helix-loop-helix protein 117),Os01g0715900,Os01g0952800(basic helix-loop-helix protein 056),Os02g0671300(basic helix-loop-helix protein 076),Os03g0251350(HAP5C SUBUNIT OF CCAAT-BOX BINDING COMPLEX),Os03g0798300(METHYLTRANSFERASE 1A),Os04g0483450,Os06g0108500,Os06g0602400(RNA helicase 52A),Os06g0667200(MADS BOX GENE 30),Os07g0255200,Os08g0136100(RICE OUTMOST CELL-SP…	CAA34008,Os01g0186000(WRKY GENE 10),Os01g0339500(NAC DOMAIN-CONTAINING PROTEIN 30),Os01g0676900,Os02g0564700(basic helix-loop-helix protein 097),Os02g0713700,Os03g0109000(NAC DOMAIN-CONTAINING PROTEIN 55),Os03g0771100,Os04g0498900,Os04g0678400(DNA BINDING WITH ONE FINGER 17),Os05g0390800(VQ motif-containing protein 19),Os05g0549800(APETALA2/ETHYLENE-RESPONSIVE ELEMENT BINDING PROTEIN 96),Os07g058…
BP	GO:0032268	regulation of cellular protein metabolic process	1	1	2	527	0.9616	1	Os02g0611500	Os03g0300400(JASMONATE INDUCIBLE PATHOGENESIS-RELATED CLASS 10 PROTEIN)
CC	GO:0031982	vesicle	0	1	1	374	0.9625	1	-	Os06g0708400(CYCLOPHILIN 19-4)
BP	GO:0019538	protein metabolic process	25	14	39	5164	0.9628	1	Os01g0122000("OsPR5),Os01g0600900(CHLOROPHYLL A/B BINDING PROTEIN 2R),Os01g0613500,Os01g0669100(Large spike S-domain receptor like Kinase 1),Os01g0727840("Subtilisin 3),Os01g0755700,Os01g0806000,Os01g0883000(RECEPTOR-LIKE CYTOPLASMIC KINASE 50),Os02g0142250,Os02g0156000(RECEPTOR-LIKE CYTOPLASMIC KINASE 62),Os02g0258900,Os02g0611500,Os03g0636800(NIMA-related kinase 1),Os04g0457000("light-harvestin…	Os01g0115600(RECEPTOR-LIKE CYTOPLASMIC KINASE 11),Os02g0607500("protein phosphatase 2C22),Os03g0300400(JASMONATE INDUCIBLE PATHOGENESIS-RELATED CLASS 10 PROTEIN),Os04g0369066(RECEPTOR-LIKE CYTOPLASMIC KINASE 144),Os04g0369100(RECEPTOR-LIKE CYTOPLASMIC KINASE 145),Os04g0498900,Os04g0506800(STLP3),Os04g0608900(dual-specificity protein kinase 4),Os06g0708400(CYCLOPHILIN 19-4),Os07g0131375,Os08g02308…
BP	GO:0044257	cellular protein catabolic process	3	1	4	852	0.9631	1	Os01g0122000("OsPR5),Os01g0613500,Os01g0755700	Os12g0595600
BP	GO:0044265	cellular macromolecule catabolic process	3	2	5	1002	0.9636	1	Os01g0122000("OsPR5),Os01g0613500,Os01g0755700	Os09g0538000(RIBONUCLEASE 5),Os12g0595600
BP	GO:0044281	small molecule metabolic process	4	5	9	1564	0.965	1	Os05g0408900(1-DEOXY-D-XYLULOSE 5-PHOSPHATE SYNTHASE 1),Os05g0555600(NADH-DEPENDENT GLUTAMATE SYNTHASE 2),Os09g0294000,Os12g0582700	Os06g0486900("FDH2),Os07g0689600(NICOTIANAMINE SYNTHASE 3),Os09g0110300(cyclase-like 4),Os10g0442400,Os11g0245100(ZETA GLUTATHIONE S-TRANSFERASE 4)
BP	GO:0034641	cellular nitrogen compound metabolic process	20	24	44	5752	0.9656	1	Os01g0197450,Os01g0566800(basic helix-loop-helix protein 117),Os01g0715900,Os01g0952800(basic helix-loop-helix protein 056),Os02g0611500,Os02g0671300(basic helix-loop-helix protein 076),Os03g0251350(HAP5C SUBUNIT OF CCAAT-BOX BINDING COMPLEX),Os03g0798300(METHYLTRANSFERASE 1A),Os04g0483450,Os05g0408900(1-DEOXY-D-XYLULOSE 5-PHOSPHATE SYNTHASE 1),Os06g0108500,Os06g0602400(RNA helicase 52A),Os06g066…	CAA34008,Os01g0186000(WRKY GENE 10),Os01g0339500(NAC DOMAIN-CONTAINING PROTEIN 30),Os01g0558100(TAU GLUTATHIONE S-TRANSFERASE 6),Os01g0676900,Os02g0564700(basic helix-loop-helix protein 097),Os02g0713700,Os03g0109000(NAC DOMAIN-CONTAINING PROTEIN 55),Os03g0771100,Os04g0498900,Os04g0678400(DNA BINDING WITH ONE FINGER 17),Os05g0390800(VQ motif-containing protein 19),Os05g0549800(APETALA2/ETHYLENE-R…
MF	GO:0016462	pyrophosphatase activity	3	2	5	952	0.96836	1	Os06g0561800(MULTIDRUG RESISTANCE-ASSOCIATED PROTEIN 11),Os06g0602400(RNA helicase 52A),Os07g0255200	Os01g0902100(MULTIDRUG RESISTANCE-ASSOCIATED PROTEIN 2),Os05g0509500
BP	GO:0044238	primary metabolic process	49	46	95	11245	0.9684	1	Os01g0122000("OsPR5),Os01g0197450,Os01g0566800(basic helix-loop-helix protein 117),Os01g0600900(CHLOROPHYLL A/B BINDING PROTEIN 2R),Os01g0613500,Os01g0669100(Large spike S-domain receptor like Kinase 1),Os01g0715900,Os01g0727840("Subtilisin 3),Os01g0755700,Os01g0806000,Os01g0883000(RECEPTOR-LIKE CYTOPLASMIC KINASE 50),Os01g0952800(basic helix-loop-helix protein 056),Os02g0142250,Os02g0156000(RECE…	CAA34008,Os01g0115600(RECEPTOR-LIKE CYTOPLASMIC KINASE 11),Os01g0186000(WRKY GENE 10),Os01g0339500(NAC DOMAIN-CONTAINING PROTEIN 30),Os01g0676900,Os01g0940800("beta-1),Os02g0247000,Os02g0564700(basic helix-loop-helix protein 097),Os02g0570400(ENT-KAURENE SYNTHASE 7),Os02g0607500("protein phosphatase 2C22),Os02g0621300("ECERIFERUM 1),Os02g0713700,Os03g0109000(NAC DOMAIN-CONTAINING PROTEIN 55),Os03…
BP	GO:0006511	ubiquitin-dependent protein catabolic process	2	1	3	726	0.9701	1	Os01g0122000("OsPR5),Os01g0755700	Os12g0595600
MF	GO:0016818	hydrolase activity, acting on acid anhydrides, in phosphorus-containing anhydrides	3	2	5	967	0.97147	1	Os06g0561800(MULTIDRUG RESISTANCE-ASSOCIATED PROTEIN 11),Os06g0602400(RNA helicase 52A),Os07g0255200	Os01g0902100(MULTIDRUG RESISTANCE-ASSOCIATED PROTEIN 2),Os05g0509500
BP	GO:0010467	gene expression	13	15	28	3974	0.9725	1	Os01g0566800(basic helix-loop-helix protein 117),Os01g0952800(basic helix-loop-helix protein 056),Os02g0611500,Os02g0671300(basic helix-loop-helix protein 076),Os03g0251350(HAP5C SUBUNIT OF CCAAT-BOX BINDING COMPLEX),Os03g0798300(METHYLTRANSFERASE 1A),Os06g0108500,Os06g0667200(MADS BOX GENE 30),Os08g0136100(RICE OUTMOST CELL-SPECIFIC GENE 7),Os08g0246800,Os08g0499300(WRKY GENE 30),Os08g0508700(ET…	CAA34008,Os01g0186000(WRKY GENE 10),Os01g0339500(NAC DOMAIN-CONTAINING PROTEIN 30),Os01g0676900,Os02g0564700(basic helix-loop-helix protein 097),Os02g0713700,Os03g0109000(NAC DOMAIN-CONTAINING PROTEIN 55),Os03g0771100,Os04g0678400(DNA BINDING WITH ONE FINGER 17),Os05g0390800(VQ motif-containing protein 19),Os05g0549800(APETALA2/ETHYLENE-RESPONSIVE ELEMENT BINDING PROTEIN 96),Os07g0628500("basic H…
CC	GO:0005654	nucleoplasm	1	0	1	409	0.9725	1	Os10g0567900	-
MF	GO:0016817	hydrolase activity, acting on acid anhydrides	3	2	5	973	0.97263	1	Os06g0561800(MULTIDRUG RESISTANCE-ASSOCIATED PROTEIN 11),Os06g0602400(RNA helicase 52A),Os07g0255200	Os01g0902100(MULTIDRUG RESISTANCE-ASSOCIATED PROTEIN 2),Os05g0509500
BP	GO:0009117	nucleotide metabolic process	0	1	1	376	0.9729	1	-	Os10g0442400
BP	GO:0019941	modification-dependent protein catabolic process	2	1	3	743	0.9736	1	Os01g0122000("OsPR5),Os01g0755700	Os12g0595600
BP	GO:0065009	regulation of molecular function	0	2	2	574	0.9739	1	-	Os03g0300400(JASMONATE INDUCIBLE PATHOGENESIS-RELATED CLASS 10 PROTEIN),Os05g0390800(VQ motif-containing protein 19)
BP	GO:0051276	chromosome organization	1	1	2	577	0.9745	1	Os07g0255200	Os04g0498900
BP	GO:0033554	cellular response to stress	1	2	3	749	0.9748	1	Os07g0255200	Os04g0498900,Os11g0598500
BP	GO:0051246	regulation of protein metabolic process	1	1	2	579	0.9749	1	Os02g0611500	Os03g0300400(JASMONATE INDUCIBLE PATHOGENESIS-RELATED CLASS 10 PROTEIN)
BP	GO:0006753	nucleoside phosphate metabolic process	0	1	1	384	0.975	1	-	Os10g0442400
BP	GO:0043632	modification-dependent macromolecule catabolic process	2	1	3	751	0.9752	1	Os01g0122000("OsPR5),Os01g0755700	Os12g0595600
BP	GO:0043603	cellular amide metabolic process	2	3	5	1063	0.9754	1	Os01g0952800(basic helix-loop-helix protein 056),Os02g0611500	Os01g0558100(TAU GLUTATHIONE S-TRANSFERASE 6),Os09g0344500("O-methyltransferase ZRP4),Os11g0245100(ZETA GLUTATHIONE S-TRANSFERASE 4)
CC	GO:0030529	intracellular ribonucleoprotein complex	1	2	3	825	0.976	1	Os06g0597250	Os05g0509500,Os08g0148600
BP	GO:0044237	cellular metabolic process	43	52	95	11345	0.9778	1	Os01g0122000("OsPR5),Os01g0191200,Os01g0197450,Os01g0566800(basic helix-loop-helix protein 117),Os01g0600900(CHLOROPHYLL A/B BINDING PROTEIN 2R),Os01g0613500,Os01g0669100(Large spike S-domain receptor like Kinase 1),Os01g0715900,Os01g0755700,Os01g0883000(RECEPTOR-LIKE CYTOPLASMIC KINASE 50),Os01g0952800(basic helix-loop-helix protein 056),Os02g0142250,Os02g0156000(RECEPTOR-LIKE CYTOPLASMIC KINASE…	CAA34008,Os01g0115600(RECEPTOR-LIKE CYTOPLASMIC KINASE 11),Os01g0186000(WRKY GENE 10),Os01g0339500(NAC DOMAIN-CONTAINING PROTEIN 30),Os01g0558100(TAU GLUTATHIONE S-TRANSFERASE 6),Os01g0676900,Os02g0247000,Os02g0564700(basic helix-loop-helix protein 097),Os02g0570400(ENT-KAURENE SYNTHASE 7),Os02g0607500("protein phosphatase 2C22),Os02g0621300("ECERIFERUM 1),Os02g0713700,Os02g0811800(CINNAMOYL-COA …
BP	GO:0008104	protein localization	1	2	3	777	0.9796	1	Os03g0282300	Os02g0575900(EXOCYST SUBUNIT EXO70 FAMILY PROTEIN FX6),Os05g0509500
BP	GO:0033036	macromolecule localization	1	3	4	946	0.9807	1	Os03g0282300	Os02g0575900(EXOCYST SUBUNIT EXO70 FAMILY PROTEIN FX6),Os05g0509500,Os05g0550300("non-specific lipid transfer protein 2.4)
BP	GO:0006518	peptide metabolic process	2	2	4	969	0.9836	1	Os01g0952800(basic helix-loop-helix protein 056),Os02g0611500	Os01g0558100(TAU GLUTATHIONE S-TRANSFERASE 6),Os11g0245100(ZETA GLUTATHIONE S-TRANSFERASE 4)
CC	GO:0005840	ribosome	1	0	1	471	0.9842	1	Os06g0597250	-
CC	GO:0031090	organelle membrane	2	2	4	1065	0.9844	1	Os01g0232000(TONOPLAST INTRINSIC PROTEIN 4;3),Os06g0561800(MULTIDRUG RESISTANCE-ASSOCIATED PROTEIN 11)	Os01g0902100(MULTIDRUG RESISTANCE-ASSOCIATED PROTEIN 2),Os04g0506800(STLP3)
BP	GO:0051172	negative regulation of nitrogen compound metabolic process	0	1	1	434	0.9846	1	-	Os03g0300400(JASMONATE INDUCIBLE PATHOGENESIS-RELATED CLASS 10 PROTEIN)
BP	GO:0055086	nucleobase-containing small molecule metabolic process	0	1	1	440	0.9855	1	-	Os10g0442400
BP	GO:0044267	cellular protein metabolic process	18	14	32	4607	0.9856	1	Os01g0122000("OsPR5),Os01g0600900(CHLOROPHYLL A/B BINDING PROTEIN 2R),Os01g0613500,Os01g0669100(Large spike S-domain receptor like Kinase 1),Os01g0755700,Os01g0883000(RECEPTOR-LIKE CYTOPLASMIC KINASE 50),Os02g0142250,Os02g0156000(RECEPTOR-LIKE CYTOPLASMIC KINASE 62),Os02g0258900,Os02g0611500,Os03g0636800(NIMA-related kinase 1),Os04g0457000("light-harvesting protein CP24),Os05g0166300,Os05g0398800…	Os01g0115600(RECEPTOR-LIKE CYTOPLASMIC KINASE 11),Os02g0607500("protein phosphatase 2C22),Os03g0300400(JASMONATE INDUCIBLE PATHOGENESIS-RELATED CLASS 10 PROTEIN),Os04g0369066(RECEPTOR-LIKE CYTOPLASMIC KINASE 144),Os04g0369100(RECEPTOR-LIKE CYTOPLASMIC KINASE 145),Os04g0498900,Os04g0506800(STLP3),Os04g0608900(dual-specificity protein kinase 4),Os06g0708400(CYCLOPHILIN 19-4),Os07g0131375,Os08g02308…
BP	GO:0006396	RNA processing	0	3	3	826	0.986	1	-	CAA34008,Os08g0148600,Os10g0442400
CC	GO:1990904	ribonucleoprotein complex	1	2	3	902	0.986	1	Os06g0597250	Os05g0509500,Os08g0148600
BP	GO:0016192	vesicle-mediated transport	0	1	1	456	0.9876	1	-	Os02g0575900(EXOCYST SUBUNIT EXO70 FAMILY PROTEIN FX6)
BP	GO:0031324	negative regulation of cellular metabolic process	0	1	1	456	0.9876	1	-	Os03g0300400(JASMONATE INDUCIBLE PATHOGENESIS-RELATED CLASS 10 PROTEIN)
MF	GO:0030234	enzyme regulator activity	0	1	1	431	0.9885	1	-	Os03g0300400(JASMONATE INDUCIBLE PATHOGENESIS-RELATED CLASS 10 PROTEIN)
BP	GO:0016071	mRNA metabolic process	0	1	1	466	0.9887	1	-	CAA34008
CC	GO:0043234	protein complex	6	1	7	1639	0.9902	1	Os01g0600900(CHLOROPHYLL A/B BINDING PROTEIN 2R),Os01g0952800(basic helix-loop-helix protein 056),Os02g0258900,Os02g0611500,Os04g0457000("light-harvesting protein CP24),Os12g0236100	Os02g0575900(EXOCYST SUBUNIT EXO70 FAMILY PROTEIN FX6)
BP	GO:0043604	amide biosynthetic process	2	1	3	892	0.9916	1	Os01g0952800(basic helix-loop-helix protein 056),Os02g0611500	Os09g0344500("O-methyltransferase ZRP4)
MF	GO:0004842	ubiquitin-protein transferase activity	2	0	2	669	0.99239	1	Os01g0122000("OsPR5),Os01g0755700	-
BP	GO:0043933	macromolecular complex subunit organization	2	0	2	723	0.9926	1	Os01g0136100(16.9 KDA CLASS I HEAT SHOCK PROTEIN 1),Os12g0236100	-
MF	GO:0098772	molecular function regulator	0	1	1	477	0.9929	1	-	Os03g0300400(JASMONATE INDUCIBLE PATHOGENESIS-RELATED CLASS 10 PROTEIN)
MF	GO:0019787	ubiquitin-like protein transferase activity	2	0	2	683	0.99332	1	Os01g0122000("OsPR5),Os01g0755700	-
CC	GO:0044428	nuclear part	4	0	4	1200	0.9937	1	Os01g0952800(basic helix-loop-helix protein 056),Os06g0602400(RNA helicase 52A),Os10g0567900,Os12g0236100	-
BP	GO:0016567	protein ubiquitination	2	0	2	749	0.9941	1	Os01g0122000("OsPR5),Os01g0755700	-
BP	GO:0046907	intracellular transport	1	1	2	754	0.9943	1	Os12g0236100	Os05g0509500
BP	GO:0006886	intracellular protein transport	0	1	1	538	0.9944	1	-	Os05g0509500
CC	GO:0043231	intracellular membrane-bounded organelle	34	26	60	8721	0.9947	1	Os01g0122000("OsPR5),Os01g0197450,Os01g0232000(TONOPLAST INTRINSIC PROTEIN 4;3),Os01g0566800(basic helix-loop-helix protein 117),Os01g0600900(CHLOROPHYLL A/B BINDING PROTEIN 2R),Os01g0613500,Os01g0715900,Os01g0952800(basic helix-loop-helix protein 056),Os02g0142250,Os02g0671300(basic helix-loop-helix protein 076),Os03g0251350(HAP5C SUBUNIT OF CCAAT-BOX BINDING COMPLEX),Os03g0251425,Os03g0798300(M…	CAA34008,Os01g0186000(WRKY GENE 10),Os01g0339500(NAC DOMAIN-CONTAINING PROTEIN 30),Os01g0902100(MULTIDRUG RESISTANCE-ASSOCIATED PROTEIN 2),Os02g0564700(basic helix-loop-helix protein 097),Os02g0621300("ECERIFERUM 1),Os02g0713700,Os03g0109000(NAC DOMAIN-CONTAINING PROTEIN 55),Os03g0300400(JASMONATE INDUCIBLE PATHOGENESIS-RELATED CLASS 10 PROTEIN),Os03g0771100,Os04g0369000(RECEPTOR-LIKE CYTOPLASMIC…
CC	GO:1990234	transferase complex	0	1	1	597	0.9949	1	-	Os02g0247000
MF	GO:0005198	structural molecule activity	1	0	1	514	0.99519	1	Os12g0236100	-
BP	GO:0050790	regulation of catalytic activity	0	1	1	553	0.9952	1	-	Os03g0300400(JASMONATE INDUCIBLE PATHOGENESIS-RELATED CLASS 10 PROTEIN)
BP	GO:0032446	protein modification by small protein conjugation	2	0	2	776	0.9953	1	Os01g0122000("OsPR5),Os01g0755700	-
BP	GO:0043161	proteasome-mediated ubiquitin-dependent protein catabolic process	1	0	1	566	0.9958	1	Os01g0755700	-
BP	GO:0051649	establishment of localization in cell	1	1	2	787	0.9958	1	Os12g0236100	Os05g0509500
BP	GO:0010498	proteasomal protein catabolic process	1	0	1	572	0.996	1	Os01g0755700	-
CC	GO:0031981	nuclear lumen	2	0	2	876	0.9963	1	Os06g0602400(RNA helicase 52A),Os10g0567900	-
BP	GO:0048523	negative regulation of cellular process	0	1	1	583	0.9964	1	-	Os03g0300400(JASMONATE INDUCIBLE PATHOGENESIS-RELATED CLASS 10 PROTEIN)
CC	GO:0043227	membrane-bounded organelle	34	26	60	8822	0.9965	1	Os01g0122000("OsPR5),Os01g0197450,Os01g0232000(TONOPLAST INTRINSIC PROTEIN 4;3),Os01g0566800(basic helix-loop-helix protein 117),Os01g0600900(CHLOROPHYLL A/B BINDING PROTEIN 2R),Os01g0613500,Os01g0715900,Os01g0952800(basic helix-loop-helix protein 056),Os02g0142250,Os02g0671300(basic helix-loop-helix protein 076),Os03g0251350(HAP5C SUBUNIT OF CCAAT-BOX BINDING COMPLEX),Os03g0251425,Os03g0798300(M…	CAA34008,Os01g0186000(WRKY GENE 10),Os01g0339500(NAC DOMAIN-CONTAINING PROTEIN 30),Os01g0902100(MULTIDRUG RESISTANCE-ASSOCIATED PROTEIN 2),Os02g0564700(basic helix-loop-helix protein 097),Os02g0621300("ECERIFERUM 1),Os02g0713700,Os03g0109000(NAC DOMAIN-CONTAINING PROTEIN 55),Os03g0300400(JASMONATE INDUCIBLE PATHOGENESIS-RELATED CLASS 10 PROTEIN),Os03g0771100,Os04g0369000(RECEPTOR-LIKE CYTOPLASMIC…
CC	GO:0005739	mitochondrion	0	3	3	1119	0.9971	1	-	Os06g0486900("FDH2),Os09g0417500,Os11g0124500
BP	GO:0043043	peptide biosynthetic process	2	0	2	836	0.9972	1	Os01g0952800(basic helix-loop-helix protein 056),Os02g0611500	-
BP	GO:0065003	macromolecular complex assembly	1	0	1	630	0.9977	1	Os01g0136100(16.9 KDA CLASS I HEAT SHOCK PROTEIN 1)	-
BP	GO:0009987	cellular process	57	59	116	13930	0.9978	1	Os01g0122000("OsPR5),Os01g0136100(16.9 KDA CLASS I HEAT SHOCK PROTEIN 1),Os01g0191200,Os01g0197450,Os01g0566800(basic helix-loop-helix protein 117),Os01g0600900(CHLOROPHYLL A/B BINDING PROTEIN 2R),Os01g0613500,Os01g0669100(Large spike S-domain receptor like Kinase 1),Os01g0715900,Os01g0755700,Os01g0883000(RECEPTOR-LIKE CYTOPLASMIC KINASE 50),Os01g0952800(basic helix-loop-helix protein 056),Os02g0…	CAA34008,Os01g0115600(RECEPTOR-LIKE CYTOPLASMIC KINASE 11),Os01g0186000(WRKY GENE 10),Os01g0339500(NAC DOMAIN-CONTAINING PROTEIN 30),Os01g0558100(TAU GLUTATHIONE S-TRANSFERASE 6),Os01g0676900,Os02g0247000,Os02g0564700(basic helix-loop-helix protein 097),Os02g0570400(ENT-KAURENE SYNTHASE 7),Os02g0575900(EXOCYST SUBUNIT EXO70 FAMILY PROTEIN FX6),Os02g0607500("protein phosphatase 2C22),Os02g0621300(…
BP	GO:0034613	cellular protein localization	0	1	1	639	0.9979	1	-	Os05g0509500
BP	GO:0070727	cellular macromolecule localization	0	1	1	647	0.9981	1	-	Os05g0509500
BP	GO:0070647	protein modification by small protein conjugation or removal	2	0	2	878	0.9981	1	Os01g0122000("OsPR5),Os01g0755700	-
BP	GO:0051641	cellular localization	1	1	2	905	0.9985	1	Os12g0236100	Os05g0509500
CC	GO:0031974	membrane-enclosed lumen	2	0	2	1053	0.9991	1	Os06g0602400(RNA helicase 52A),Os10g0567900	-
CC	GO:0043233	organelle lumen	2	0	2	1053	0.9991	1	Os06g0602400(RNA helicase 52A),Os10g0567900	-
CC	GO:0070013	intracellular organelle lumen	2	0	2	1053	0.9991	1	Os06g0602400(RNA helicase 52A),Os10g0567900	-
CC	GO:0043229	intracellular organelle	35	26	61	9371	0.9995	1	Os01g0122000("OsPR5),Os01g0197450,Os01g0232000(TONOPLAST INTRINSIC PROTEIN 4;3),Os01g0566800(basic helix-loop-helix protein 117),Os01g0600900(CHLOROPHYLL A/B BINDING PROTEIN 2R),Os01g0613500,Os01g0715900,Os01g0952800(basic helix-loop-helix protein 056),Os02g0142250,Os02g0671300(basic helix-loop-helix protein 076),Os03g0251350(HAP5C SUBUNIT OF CCAAT-BOX BINDING COMPLEX),Os03g0251425,Os03g0798300(M…	CAA34008,Os01g0186000(WRKY GENE 10),Os01g0339500(NAC DOMAIN-CONTAINING PROTEIN 30),Os01g0902100(MULTIDRUG RESISTANCE-ASSOCIATED PROTEIN 2),Os02g0564700(basic helix-loop-helix protein 097),Os02g0621300("ECERIFERUM 1),Os02g0713700,Os03g0109000(NAC DOMAIN-CONTAINING PROTEIN 55),Os03g0300400(JASMONATE INDUCIBLE PATHOGENESIS-RELATED CLASS 10 PROTEIN),Os03g0771100,Os04g0369000(RECEPTOR-LIKE CYTOPLASMIC…
CC	GO:0043226	organelle	35	26	61	9385	0.9995	1	Os01g0122000("OsPR5),Os01g0197450,Os01g0232000(TONOPLAST INTRINSIC PROTEIN 4;3),Os01g0566800(basic helix-loop-helix protein 117),Os01g0600900(CHLOROPHYLL A/B BINDING PROTEIN 2R),Os01g0613500,Os01g0715900,Os01g0952800(basic helix-loop-helix protein 056),Os02g0142250,Os02g0671300(basic helix-loop-helix protein 076),Os03g0251350(HAP5C SUBUNIT OF CCAAT-BOX BINDING COMPLEX),Os03g0251425,Os03g0798300(M…	CAA34008,Os01g0186000(WRKY GENE 10),Os01g0339500(NAC DOMAIN-CONTAINING PROTEIN 30),Os01g0902100(MULTIDRUG RESISTANCE-ASSOCIATED PROTEIN 2),Os02g0564700(basic helix-loop-helix protein 097),Os02g0621300("ECERIFERUM 1),Os02g0713700,Os03g0109000(NAC DOMAIN-CONTAINING PROTEIN 55),Os03g0300400(JASMONATE INDUCIBLE PATHOGENESIS-RELATED CLASS 10 PROTEIN),Os03g0771100,Os04g0369000(RECEPTOR-LIKE CYTOPLASMIC…
BP	GO:0022607	cellular component assembly	1	0	1	798	0.9996	1	Os01g0136100(16.9 KDA CLASS I HEAT SHOCK PROTEIN 1)	-
BP	GO:0006412	translation	1	0	1	820	0.9997	1	Os02g0611500	-
CC	GO:1902494	catalytic complex	0	1	1	1035	0.9999	1	-	Os02g0247000
CC	GO:0044446	intracellular organelle part	12	5	17	4018	0.9999	1	Os01g0232000(TONOPLAST INTRINSIC PROTEIN 4;3),Os01g0600900(CHLOROPHYLL A/B BINDING PROTEIN 2R),Os01g0952800(basic helix-loop-helix protein 056),Os02g0142250,Os04g0457000("light-harvesting protein CP24),Os05g0408900(1-DEOXY-D-XYLULOSE 5-PHOSPHATE SYNTHASE 1),Os06g0561800(MULTIDRUG RESISTANCE-ASSOCIATED PROTEIN 11),Os06g0602400(RNA helicase 52A),Os09g0294000,Os09g0517000,Os10g0567900,Os12g0236100	Os01g0902100(MULTIDRUG RESISTANCE-ASSOCIATED PROTEIN 2),Os02g0621300("ECERIFERUM 1),Os04g0369000(RECEPTOR-LIKE CYTOPLASMIC KINASE 144),Os04g0506800(STLP3),Os06g0708400(CYCLOPHILIN 19-4)
CC	GO:0044422	organelle part	12	5	17	4025	0.9999	1	Os01g0232000(TONOPLAST INTRINSIC PROTEIN 4;3),Os01g0600900(CHLOROPHYLL A/B BINDING PROTEIN 2R),Os01g0952800(basic helix-loop-helix protein 056),Os02g0142250,Os04g0457000("light-harvesting protein CP24),Os05g0408900(1-DEOXY-D-XYLULOSE 5-PHOSPHATE SYNTHASE 1),Os06g0561800(MULTIDRUG RESISTANCE-ASSOCIATED PROTEIN 11),Os06g0602400(RNA helicase 52A),Os09g0294000,Os09g0517000,Os10g0567900,Os12g0236100	Os01g0902100(MULTIDRUG RESISTANCE-ASSOCIATED PROTEIN 2),Os02g0621300("ECERIFERUM 1),Os04g0369000(RECEPTOR-LIKE CYTOPLASMIC KINASE 144),Os04g0506800(STLP3),Os06g0708400(CYCLOPHILIN 19-4)
CC	GO:0032991	macromolecular complex	7	4	11	3082	0.9999	1	Os01g0600900(CHLOROPHYLL A/B BINDING PROTEIN 2R),Os01g0952800(basic helix-loop-helix protein 056),Os02g0258900,Os02g0611500,Os04g0457000("light-harvesting protein CP24),Os06g0597250,Os12g0236100	Os02g0247000,Os02g0575900(EXOCYST SUBUNIT EXO70 FAMILY PROTEIN FX6),Os05g0509500,Os08g0148600
CC	GO:0005829	cytosol	0	2	2	1366	0.9999	1	-	Os06g0708400(CYCLOPHILIN 19-4),Os09g0344500("O-methyltransferase ZRP4)
BP	GO:0006996	organelle organization	2	1	3	1563	1	1	Os07g0255200,Os12g0236100	Os04g0498900
BP	GO:0016043	cellular component organization	5	2	7	2496	1	1	Os01g0136100(16.9 KDA CLASS I HEAT SHOCK PROTEIN 1),Os07g0255200,Os07g0607400(PECTIN METHYLESTERASE 20),Os09g0530200(glycoside hydrolase OsGH9B14),Os12g0236100	Os04g0498900,Os04g0688500(class III peroxidase 62)
BP	GO:0044085	cellular component biogenesis	1	0	1	1251	1	1	Os01g0136100(16.9 KDA CLASS I HEAT SHOCK PROTEIN 1)	-
BP	GO:0071840	cellular component organization or biogenesis	5	2	7	2837	1	1	Os01g0136100(16.9 KDA CLASS I HEAT SHOCK PROTEIN 1),Os07g0255200,Os07g0607400(PECTIN METHYLESTERASE 20),Os09g0530200(glycoside hydrolase OsGH9B14),Os12g0236100	Os04g0498900,Os04g0688500(class III peroxidase 62)
BP	GO:0008150	biological_process	82	89	171	18088	1	1	Os01g0122000("OsPR5),Os01g0136100(16.9 KDA CLASS I HEAT SHOCK PROTEIN 1),Os01g0191200,Os01g0197450,Os01g0232000(TONOPLAST INTRINSIC PROTEIN 4;3),Os01g0566800(basic helix-loop-helix protein 117),Os01g0600900(CHLOROPHYLL A/B BINDING PROTEIN 2R),Os01g0613500,Os01g0669100(Large spike S-domain receptor like Kinase 1),Os01g0715900,Os01g0727840("Subtilisin 3),Os01g0755700,Os01g0806000,Os01g0883000(RECEP…	CAA34008,Os01g0115600(RECEPTOR-LIKE CYTOPLASMIC KINASE 11),Os01g0186000(WRKY GENE 10),Os01g0339500(NAC DOMAIN-CONTAINING PROTEIN 30),Os01g0558100(TAU GLUTATHIONE S-TRANSFERASE 6),Os01g0676900,Os01g0832600,Os01g0902100(MULTIDRUG RESISTANCE-ASSOCIATED PROTEIN 2),Os01g0940800("beta-1),Os02g0247000,Os02g0564700(basic helix-loop-helix protein 097),Os02g0570400(ENT-KAURENE SYNTHASE 7),Os02g0575900(EXOC…
CC	GO:0005622	intracellular	41	33	74	11422	1	1	Os01g0122000("OsPR5),Os01g0136100(16.9 KDA CLASS I HEAT SHOCK PROTEIN 1),Os01g0197450,Os01g0232000(TONOPLAST INTRINSIC PROTEIN 4;3),Os01g0566800(basic helix-loop-helix protein 117),Os01g0600900(CHLOROPHYLL A/B BINDING PROTEIN 2R),Os01g0613500,Os01g0715900,Os01g0952800(basic helix-loop-helix protein 056),Os02g0142250,Os02g0611500,Os02g0671300(basic helix-loop-helix protein 076),Os03g0251350(HAP5C …	CAA34008,Os01g0186000(WRKY GENE 10),Os01g0339500(NAC DOMAIN-CONTAINING PROTEIN 30),Os01g0558100(TAU GLUTATHIONE S-TRANSFERASE 6),Os01g0902100(MULTIDRUG RESISTANCE-ASSOCIATED PROTEIN 2),Os02g0564700(basic helix-loop-helix protein 097),Os02g0575900(EXOCYST SUBUNIT EXO70 FAMILY PROTEIN FX6),Os02g0621300("ECERIFERUM 1),Os02g0713700,Os03g0109000(NAC DOMAIN-CONTAINING PROTEIN 55),Os03g0300400(JASMONATE…
CC	GO:0043228	non-membrane-bounded organelle	2	0	2	1512	1	1	Os06g0597250,Os06g0602400(RNA helicase 52A)	-
CC	GO:0043232	intracellular non-membrane-bounded organelle	2	0	2	1512	1	1	Os06g0597250,Os06g0602400(RNA helicase 52A)	-
CC	GO:0044444	cytoplasmic part	14	13	27	5701	1	1	Os01g0232000(TONOPLAST INTRINSIC PROTEIN 4;3),Os01g0600900(CHLOROPHYLL A/B BINDING PROTEIN 2R),Os01g0613500,Os02g0142250,Os02g0611500,Os04g0457000("light-harvesting protein CP24),Os04g0483500("beta-ketoacyl-CoA reductase 1),Os05g0408900(1-DEOXY-D-XYLULOSE 5-PHOSPHATE SYNTHASE 1),Os05g0555600(NADH-DEPENDENT GLUTAMATE SYNTHASE 2),Os06g0299100,Os06g0561800(MULTIDRUG RESISTANCE-ASSOCIATED PROTEIN 11)…	CAA34008,Os01g0902100(MULTIDRUG RESISTANCE-ASSOCIATED PROTEIN 2),Os02g0575900(EXOCYST SUBUNIT EXO70 FAMILY PROTEIN FX6),Os02g0621300("ECERIFERUM 1),Os04g0369000(RECEPTOR-LIKE CYTOPLASMIC KINASE 144),Os04g0506800(STLP3),Os05g0509500,Os06g0273500("leaf senescence protein),Os06g0486900("FDH2),Os06g0708400(CYCLOPHILIN 19-4),Os09g0344500("O-methyltransferase ZRP4),Os09g0417500,Os11g0124500
CC	GO:0005737	cytoplasm	20	19	39	7307	1	1	Os01g0136100(16.9 KDA CLASS I HEAT SHOCK PROTEIN 1),Os01g0232000(TONOPLAST INTRINSIC PROTEIN 4;3),Os01g0600900(CHLOROPHYLL A/B BINDING PROTEIN 2R),Os01g0613500,Os02g0142250,Os02g0611500,Os03g0251350(HAP5C SUBUNIT OF CCAAT-BOX BINDING COMPLEX),Os03g0861400,Os04g0401000(PYRICULARIA ORYZAE RESISTANCE 21),Os04g0457000("light-harvesting protein CP24),Os04g0483500("beta-ketoacyl-CoA reductase 1),Os05g0…	CAA34008,Os01g0558100(TAU GLUTATHIONE S-TRANSFERASE 6),Os01g0902100(MULTIDRUG RESISTANCE-ASSOCIATED PROTEIN 2),Os02g0575900(EXOCYST SUBUNIT EXO70 FAMILY PROTEIN FX6),Os02g0621300("ECERIFERUM 1),Os03g0300400(JASMONATE INDUCIBLE PATHOGENESIS-RELATED CLASS 10 PROTEIN),Os04g0369000(RECEPTOR-LIKE CYTOPLASMIC KINASE 144),Os04g0400000,Os04g0506800(STLP3),Os05g0509500,Os06g0273500("leaf senescence protei…
CC	GO:0044424	intracellular part	39	32	71	11203	1	1	Os01g0122000("OsPR5),Os01g0136100(16.9 KDA CLASS I HEAT SHOCK PROTEIN 1),Os01g0197450,Os01g0232000(TONOPLAST INTRINSIC PROTEIN 4;3),Os01g0566800(basic helix-loop-helix protein 117),Os01g0600900(CHLOROPHYLL A/B BINDING PROTEIN 2R),Os01g0613500,Os01g0715900,Os01g0952800(basic helix-loop-helix protein 056),Os02g0142250,Os02g0611500,Os02g0671300(basic helix-loop-helix protein 076),Os03g0251350(HAP5C …	CAA34008,Os01g0186000(WRKY GENE 10),Os01g0339500(NAC DOMAIN-CONTAINING PROTEIN 30),Os01g0558100(TAU GLUTATHIONE S-TRANSFERASE 6),Os01g0902100(MULTIDRUG RESISTANCE-ASSOCIATED PROTEIN 2),Os02g0564700(basic helix-loop-helix protein 097),Os02g0575900(EXOCYST SUBUNIT EXO70 FAMILY PROTEIN FX6),Os02g0621300("ECERIFERUM 1),Os02g0713700,Os03g0109000(NAC DOMAIN-CONTAINING PROTEIN 55),Os03g0300400(JASMONATE…
CC	GO:0005575	cellular_component	84	75	159	18380	1	1	Os01g0122000("OsPR5),Os01g0136100(16.9 KDA CLASS I HEAT SHOCK PROTEIN 1),Os01g0197450,Os01g0232000(TONOPLAST INTRINSIC PROTEIN 4;3),Os01g0566800(basic helix-loop-helix protein 117),Os01g0600900(CHLOROPHYLL A/B BINDING PROTEIN 2R),Os01g0613500,Os01g0669100(Large spike S-domain receptor like Kinase 1),Os01g0715900,Os01g0755700,Os01g0806000,Os01g0883000(RECEPTOR-LIKE CYTOPLASMIC KINASE 50),Os01g0952…	CAA34008,Os01g0115600(RECEPTOR-LIKE CYTOPLASMIC KINASE 11),Os01g0144800,Os01g0162200,Os01g0186000(WRKY GENE 10),Os01g0339500(NAC DOMAIN-CONTAINING PROTEIN 30),Os01g0558100(TAU GLUTATHIONE S-TRANSFERASE 6),Os01g0902100(MULTIDRUG RESISTANCE-ASSOCIATED PROTEIN 2),Os01g0924200,Os01g0940800("beta-1),Os02g0247000,Os02g0564700(basic helix-loop-helix protein 097),Os02g0575900(EXOCYST SUBUNIT EXO70 FAMILY…
MF	GO:0003674	molecular_function	107	92	199	19522	1	1	Os01g0122000("OsPR5),Os01g0136100(16.9 KDA CLASS I HEAT SHOCK PROTEIN 1),Os01g0191200,Os01g0197450,Os01g0232000(TONOPLAST INTRINSIC PROTEIN 4;3),Os01g0566800(basic helix-loop-helix protein 117),Os01g0577300(TRANSCRIPTIONAL ACTIVATOR B),Os01g0600900(CHLOROPHYLL A/B BINDING PROTEIN 2R),Os01g0613500,Os01g0669100(Large spike S-domain receptor like Kinase 1),Os01g0715900,Os01g0727840("Subtilisin 3),Os…	CAA34008,Os01g0115600(RECEPTOR-LIKE CYTOPLASMIC KINASE 11),Os01g0137700,Os01g0162200,Os01g0186000(WRKY GENE 10),Os01g0339500(NAC DOMAIN-CONTAINING PROTEIN 30),Os01g0558100(TAU GLUTATHIONE S-TRANSFERASE 6),Os01g0676900,Os01g0791033,Os01g0832600,Os01g0902100(MULTIDRUG RESISTANCE-ASSOCIATED PROTEIN 2),Os01g0940800("beta-1),Os02g0247000,Os02g0564700(basic helix-loop-helix protein 097),Os02g0570400(EN…
