# Supplementary material for: Overexpressing PpBURP2 in Rice Increases Plant Defense to Abiotic Stress and Bacterial Leaf Blight
Source: Front Plant Sci. 2022 May 6;13:812279. doi: 10.3389/fpls.2022.812279 (PMC9121072; doi:10.3389/fpls.2022.812279)
Supplement: Supplementary file 7 [file Table_6.xlsx]

## Sheet: Sheet1
PathwayID	Pathway	Level1	Level2	Up_number	Down_number	DEG_number	total_number	Pvalue	FDR	Up_gene	Down_gene	URL
osa00940	Phenylpropanoid biosynthesis - Oryza sativa japonica (Japanese rice) (RefSeq)	Metabolism	Biosynthesis of other secondary metabolites	1	5	6	158	0.00183606	0.0605901	Os02g0240300(class III peroxidase 29)	Os10g0109600(PEROXIDASE A),Os04g0688500(class III peroxidase 62),Os11g0112200(class III peroxidase 131),Os02g0811800(CINNAMOYL-COA REDUCTASE 10),Os09g0127300	http://www.kegg.jp/kegg-bin/show_pathway?map00940/K09753%09%23FFFFFF,green/K00430%09%23FFFFFF,purple/
osa00196	Photosynthesis - antenna proteins - Oryza sativa japonica (Japanese rice) (RefSeq)	Metabolism	Energy metabolism	2	0	2	15	0.00665949	0.109882	Os01g0600900(CHLOROPHYLL A/B BINDING PROTEIN 2R),Os04g0457000("light-harvesting protein CP24)	-	http://www.kegg.jp/kegg-bin/show_pathway?map00196/K08917%09%23FFFFFF,red/K08912%09%23FFFFFF,red/
osa00904	Diterpenoid biosynthesis - Oryza sativa japonica (Japanese rice) (RefSeq)	Metabolism	Metabolism of terpenoids and polyketides	0	2	2	25	0.0180467	0.198513	-	Os02g0570400(ENT-KAURENE SYNTHASE 7),Os12g0491800(KAURENE SYNTHASE-LIKE 10)	http://www.kegg.jp/kegg-bin/show_pathway?map00904/K14037%09%23FFFFFF,green/K14036%09%23FFFFFF,green/
osa00902	Monoterpenoid biosynthesis - Oryza sativa japonica (Japanese rice) (RefSeq)	Metabolism	Metabolism of terpenoids and polyketides	0	1	1	6	0.0489658	0.24089	-	Os04g0532100	http://www.kegg.jp/kegg-bin/show_pathway?map00902/K15095%09%23FFFFFF,green/
osa00604	Glycosphingolipid biosynthesis - ganglio series - Oryza sativa japonica (Japanese rice) (RefSeq)	Metabolism	Glycan biosynthesis and metabolism	1	0	1	6	0.0489658	0.24089	Os07g0575500	-	http://www.kegg.jp/kegg-bin/show_pathway?map00604/K12373%09%23FFFFFF,red/
osa00909	Sesquiterpenoid and triterpenoid biosynthesis - Oryza sativa japonica (Japanese rice) (RefSeq)	Metabolism	Metabolism of terpenoids and polyketides	1	0	1	6	0.0489658	0.24089	Os11g0285000("oxidosqualene cyclase 8)	-	http://www.kegg.jp/kegg-bin/show_pathway?map00909/K19011%09%23FFFFFF,red/
osa04122	Sulfur relay system - Oryza sativa japonica (Japanese rice) (RefSeq)	Genetic Information Processing	Folding, sorting and degradation	1	0	1	8	0.0647597	0.24089	Os02g0258900	-	http://www.kegg.jp/kegg-bin/show_pathway?map04122/K03639%09%23FFFFFF,red/
osa00603	Glycosphingolipid biosynthesis - globo and isoglobo series - Oryza sativa japonica (Japanese rice) (RefSeq)	Metabolism	Glycan biosynthesis and metabolism	1	0	1	9	0.07256	0.24089	Os07g0575500	-	http://www.kegg.jp/kegg-bin/show_pathway?map00603/K12373%09%23FFFFFF,red/
osa00261	Monobactam biosynthesis - Oryza sativa japonica (Japanese rice) (RefSeq)	Metabolism	Biosynthesis of other secondary metabolites	1	0	1	9	0.07256	0.24089	Os09g0294000	-	http://www.kegg.jp/kegg-bin/show_pathway?map00261/K12524%09%23FFFFFF,red/
osa00520	Amino sugar and nucleotide sugar metabolism - Oryza sativa japonica (Japanese rice) (RefSeq)	Metabolism	Carbohydrate metabolism	1	2	3	121	0.079038	0.24089	Os07g0575500	Os06g0726100(CHITINASE 3),Os04g0640700	http://www.kegg.jp/kegg-bin/show_pathway?map00520/K12373%09%23FFFFFF,red/K15920%09%23FFFFFF,green/K20547%09%23FFFFFF,green/
osa00531	Glycosaminoglycan degradation - Oryza sativa japonica (Japanese rice) (RefSeq)	Metabolism	Glycan biosynthesis and metabolism	1	0	1	10	0.0802965	0.24089	Os07g0575500	-	http://www.kegg.jp/kegg-bin/show_pathway?map00531/K12373%09%23FFFFFF,red/
osa00300	Lysine biosynthesis - Oryza sativa japonica (Japanese rice) (RefSeq)	Metabolism	Amino acid metabolism	1	0	1	11	0.0879698	0.241917	Os09g0294000	-	http://www.kegg.jp/kegg-bin/show_pathway?map00300/K12524%09%23FFFFFF,red/
osa00511	Other glycan degradation - Oryza sativa japonica (Japanese rice) (RefSeq)	Metabolism	Glycan biosynthesis and metabolism	1	0	1	15	0.118041	0.269757	Os07g0575500	-	http://www.kegg.jp/kegg-bin/show_pathway?map00511/K12373%09%23FFFFFF,red/
osa00730	Thiamine metabolism - Oryza sativa japonica (Japanese rice) (RefSeq)	Metabolism	Metabolism of cofactors and vitamins	1	0	1	17	0.13271	0.269757	Os05g0408900(1-DEOXY-D-XYLULOSE 5-PHOSPHATE SYNTHASE 1)	-	http://www.kegg.jp/kegg-bin/show_pathway?map00730/K01662%09%23FFFFFF,red/
osa00270	Cysteine and methionine metabolism - Oryza sativa japonica (Japanese rice) (RefSeq)	Metabolism	Amino acid metabolism	2	0	2	78	0.137188	0.269757	Os03g0798300(METHYLTRANSFERASE 1A),Os09g0294000	-	http://www.kegg.jp/kegg-bin/show_pathway?map00270/K00558%09%23FFFFFF,red/K12524%09%23FFFFFF,red/
osa01040	Biosynthesis of unsaturated fatty acids - Oryza sativa japonica (Japanese rice) (RefSeq)	Metabolism	Lipid metabolism	1	0	1	19	0.14714	0.269757	Os04g0483500("beta-ketoacyl-CoA reductase 1)	-	http://www.kegg.jp/kegg-bin/show_pathway?map01040/K10251%09%23FFFFFF,red/
osa00073	Cutin, suberine and wax biosynthesis - Oryza sativa japonica (Japanese rice) (RefSeq)	Metabolism	Lipid metabolism	0	1	1	19	0.14714	0.269757	-	Os02g0621300("ECERIFERUM 1)	http://www.kegg.jp/kegg-bin/show_pathway?map00073/K15404%09%23FFFFFF,green/
osa00790	Folate biosynthesis - Oryza sativa japonica (Japanese rice) (RefSeq)	Metabolism	Metabolism of cofactors and vitamins	1	0	1	19	0.14714	0.269757	Os02g0258900	-	http://www.kegg.jp/kegg-bin/show_pathway?map00790/K03639%09%23FFFFFF,red/
osa00062	Fatty acid elongation - Oryza sativa japonica (Japanese rice) (RefSeq)	Metabolism	Lipid metabolism	1	0	1	26	0.195817	0.340103	Os04g0483500("beta-ketoacyl-CoA reductase 1)	-	http://www.kegg.jp/kegg-bin/show_pathway?map00062/K10251%09%23FFFFFF,red/
osa00350	Tyrosine metabolism - Oryza sativa japonica (Japanese rice) (RefSeq)	Metabolism	Amino acid metabolism	0	1	1	29	0.215836	0.356129	-	Os11g0245100(ZETA GLUTATHIONE S-TRANSFERASE 4)	http://www.kegg.jp/kegg-bin/show_pathway?map00350/K01800%09%23FFFFFF,green/
osa04016	MAPK signaling pathway - plant - Oryza sativa japonica (Japanese rice) (RefSeq)	Environmental Information Processing	Signal transduction	1	1	2	111	0.236079	0.370981	Os08g0508700(ETHYLENE INSENSITIVE-LIKE GENE 4)	Os06g0726100(CHITINASE 3)	http://www.kegg.jp/kegg-bin/show_pathway?map04016/K14514%09%23FFFFFF,red/K20547%09%23FFFFFF,green/
osa00900	Terpenoid backbone biosynthesis - Oryza sativa japonica (Japanese rice) (RefSeq)	Metabolism	Metabolism of terpenoids and polyketides	1	0	1	36	0.260666	0.390999	Os05g0408900(1-DEOXY-D-XYLULOSE 5-PHOSPHATE SYNTHASE 1)	-	http://www.kegg.jp/kegg-bin/show_pathway?map00900/K01662%09%23FFFFFF,red/
osa00380	Tryptophan metabolism - Oryza sativa japonica (Japanese rice) (RefSeq)	Metabolism	Amino acid metabolism	0	1	1	39	0.279102	0.392076	-	Os09g0344500("O-methyltransferase ZRP4)	http://www.kegg.jp/kegg-bin/show_pathway?map00380/K22588%09%23FFFFFF,green/
osa03060	Protein export - Oryza sativa japonica (Japanese rice) (RefSeq)	Genetic Information Processing	Folding, sorting and degradation	0	1	1	40	0.285146	0.392076	-	Os05g0509500	http://www.kegg.jp/kegg-bin/show_pathway?map03060/K03106%09%23FFFFFF,green/
osa00040	Pentose and glucuronate interconversions - Oryza sativa japonica (Japanese rice) (RefSeq)	Metabolism	Carbohydrate metabolism	1	0	1	48	0.331748	0.435251	Os07g0607400(PECTIN METHYLESTERASE 20)	-	http://www.kegg.jp/kegg-bin/show_pathway?map00040/K01051%09%23FFFFFF,red/
osa00260	Glycine, serine and threonine metabolism - Oryza sativa japonica (Japanese rice) (RefSeq)	Metabolism	Amino acid metabolism	1	0	1	50	0.342925	0.435251	Os09g0294000	-	http://www.kegg.jp/kegg-bin/show_pathway?map00260/K12524%09%23FFFFFF,red/
osa00630	Glyoxylate and dicarboxylate metabolism - Oryza sativa japonica (Japanese rice) (RefSeq)	Metabolism	Carbohydrate metabolism	0	1	1	61	0.401203	0.490359	-	Os06g0486900("FDH2)	http://www.kegg.jp/kegg-bin/show_pathway?map00630/K00122%09%23FFFFFF,green/
osa00480	Glutathione metabolism - Oryza sativa japonica (Japanese rice) (RefSeq)	Metabolism	Metabolism of other amino acids	0	1	1	76	0.472584	0.556974	-	Os01g0558100(TAU GLUTATHIONE S-TRANSFERASE 6)	http://www.kegg.jp/kegg-bin/show_pathway?map00480/K00799%09%23FFFFFF,green/
osa00500	Starch and sucrose metabolism - Oryza sativa japonica (Japanese rice) (RefSeq)	Metabolism	Carbohydrate metabolism	1	0	1	105	0.587742	0.658063	Os09g0530200(glycoside hydrolase OsGH9B14)	-	http://www.kegg.jp/kegg-bin/show_pathway?map00500/K01179%09%23FFFFFF,red/
osa03013	RNA transport - Oryza sativa japonica (Japanese rice) (RefSeq)	Genetic Information Processing	Translation	1	0	1	113	0.614911	0.658063	Os02g0611500	-	http://www.kegg.jp/kegg-bin/show_pathway?map03013/K03260%09%23FFFFFF,red/
osa04626	Plant-pathogen interaction - Oryza sativa japonica (Japanese rice) (RefSeq)	Organismal Systems	Environmental adaptation	1	0	1	114	0.618181	0.658063	Os08g0499300(WRKY GENE 30)	-	http://www.kegg.jp/kegg-bin/show_pathway?map04626/K18835%09%23FFFFFF,red/
osa04141	Protein processing in endoplasmic reticulum - Oryza sativa japonica (Japanese rice) (RefSeq)	Genetic Information Processing	Folding, sorting and degradation	1	0	1	155	0.731192	0.754042	Os01g0136100(16.9 KDA CLASS I HEAT SHOCK PROTEIN 1)	-	http://www.kegg.jp/kegg-bin/show_pathway?map04141/K13993%09%23FFFFFF,red/
osa04075	Plant hormone signal transduction - Oryza sativa japonica (Japanese rice) (RefSeq)	Environmental Information Processing	Signal transduction	1	0	1	180	0.783246	0.783246	Os08g0508700(ETHYLENE INSENSITIVE-LIKE GENE 4)	-	http://www.kegg.jp/kegg-bin/show_pathway?map04075/K14514%09%23FFFFFF,red/
