# Supplementary material for: Overexpressing PpBURP2 in Rice Increases Plant Defense to Abiotic Stress and Bacterial Leaf Blight
Source: Front Plant Sci. 2022 May 6;13:812279. doi: 10.3389/fpls.2022.812279 (PMC9121072; doi:10.3389/fpls.2022.812279)
Supplement: Supplementary file 8 [file Table_7.xlsx]

## Sheet: Sheet1
	Gene_ID	PRIMER-F	PRIMER-R
UP01	Os05g0472400	GCTGGAATCCTCAACTACATG	CAAAGCTATCCCAACCAGCAGC
UP02	Os11g0112200	GGATCCAGTGGACAGATCAGG	CTACAGCATCAGGAAAGGGAC
UP03	Os05g0472700	CTCGGCGCAGGGCTCATGTCC	GAGCGCGAGCGTGATCAGACG
UP04	Os03g0235000	CCAGATTCGCAAGAACTGCAG	CACACTTGAGTCCAAGAAGACG
UP05	Os04g0688500	CCAAGACCCCGGTTTCGCTG	CGAACATATACATACATACAGTTGG
UP06	Os07g0519600	GGACCGAGACATTGGTAACC	GGCTTCTGGTCTCAAGTTCC
UP07	Os12g0476200	ATGCACGTGTGCAGTACCAc	AGAGAATATAGGTGAAGAAGTTGCT
UP08	Os09g0127300	TACATGCACACCGATCGACAC	CACACACAGCACTGACGCTA
UP09	Os02g0621300	CTGGAAGGATGGAACATGCAC	CACCATCCATGCTTCCAGAGG
DN01	Os05g0555600	CTGTTGCTAACAAGCTGGGTC	CACGTCTGCAGTCTCCAGCAG
DN02	Os02g0734400	GTGGGAGACGACGTTCAAGC	AGAGGGACCCTTCTTCTTCG
DN3S	Os01g0600900	CGTCTCTGCAGGAGAGTGTG	ACTCGTACATCCATCCACGC
DN04	Os02g0649900	GCACAAGATCAACAGCAAGG	GGTGGCTTAACCTTAGCAAGG
DN05	Os04g0401000	AGGACAACGCCAACGCCTGC	TCCGAGGCAAGGAAAGGAGC
DN06	Os04g0223500	CATGAAGCGCTATTCTCGTGG	CAGCCCAGAATCCGTTCTTCC
DN07	Os04g0578600	AGCAACCGCGTGTACCCGTG	CCTCGGCCCTCCTCCGCTTG
DN08	Os09g0294000	GTGGCGTCTTCTGCGACATC	CGCCTCATCTTCCTCCAGAC
PpBURP2	JQ290006	CAATTGTACTACTGCCACCACG	CCCACATGGTTGTATTCAAATG
PpActin	XM_001783849	GTCGCTGATCGGGATGGAAGC	CCTGTGAACGATTGATGGACC
OsActin	AY212324	TTCCTCATGCCATCCTGCGTCTG	GTCCCTTACAATTTCCCGTTCAGC
